# Supplementary material for: Muscle stem cell polarity requires QKI-mediated alternative splicing of Integrin Alpha-7 (Itga7)
Source: Life Sci Alliance. 2022 Feb 14;5(5):e202101192. doi: 10.26508/lsa.202101192 (PMC8860092; doi:10.26508/lsa.202101192)
Supplement: Supplementary file 1 [file LSA-2021-01192_TableS1.xls]

## Sheet: Up and Down regulated genes
test_id	gene_id	gene	log2(fold_change)	p_value	q_value	significant	fold change	test_stat	locus	sample_1	sample_2	status	value_1	value_2
ENSMUSG00000110887.1	ENSMUSG00000110887.1	Cbx3-ps8	#NAME?	5e-05	0.00437167	yes	#NAME?	#NAME?	chr9:7723146-7723694	q1	q2	OK	0.180295	0
ENSMUSG00000068487.6	ENSMUSG00000068487.6	Ndufa11b	#NAME?	0.00015	0.0107305	yes	#NAME?	#NAME?	chr16:22053509-22053933	q1	q2	OK	0.208469	0
ENSMUSG00000082539.1	ENSMUSG00000082539.1	Gm15207	#NAME?	0.0002	0.0132252	yes	#NAME?	#NAME?	chrX:162845824-162846266	q1	q2	OK	0.170541	0
ENSMUSG00000111085.1	ENSMUSG00000111085.1	Gm7607	inf	5e-05	0.00437167	yes	#VALUE!	#NAME?	chr9:14663021-14665099	q1	q2	OK	0	0.180689
ENSMUSG00000112003.1	ENSMUSG00000112003.1	Gm4864	4.95077	0.00025	0.0158649	yes	30.9265	5.2044	chr12:77623548-77625009	q1	q2	OK	0.0396968	1.22768
ENSMUSG00000101009.6	ENSMUSG00000101009.6	1700108F19Rik	4.72487	5e-05	0.00437167	yes	26.444	1.32589	chr14:76672962-76687169	q1	q2	OK	0.041508	1.09764
ENSMUSG00000112907.1	ENSMUSG00000112907.1	Gm47015	4.091	0.0003	0.0181592	yes	17.0417	4.08119	chr10:79412961-79417905	q1	q2	OK	0.0190017	0.323821
ENSMUSG00000081788.2	ENSMUSG00000081788.2	Gm5898	2.76571	5e-05	0.00437167	yes	6.80083	5.42862	chr7:63444750-63759028	q1	q2	OK	0.557176	3.78925
ENSMUSG00000070605.4	ENSMUSG00000070605.4	Zfp992	2.72283	5e-05	0.00437167	yes	6.60167	5.21299	chr4:146449022-146470292	q1	q2	OK	0.0532683	0.351659
ENSMUSG00000061062.5	ENSMUSG00000061062.5	Hdac1-ps	2.44621	5e-05	0.00437167	yes	5.44983	6.31346	chr17:78491581-78493025	q1	q2	OK	0.504488	2.74936
ENSMUSG00000105345.1	ENSMUSG00000105345.1	BC030343	1.89086	5e-05	0.00437167	yes	3.70856	3.11357	chr5:143270074-143272513	q1	q2	OK	0.077146	0.286101
ENSMUSG00000054752.16	ENSMUSG00000054752.16	Fsd1l	1.86135	5e-05	0.00437167	yes	3.63348	6.27179	chr4:53631470-53707009	q1	q2	OK	0.898206	3.2636
ENSMUSG00000115783.1	ENSMUSG00000115783.1	Bc1	1.57512	5e-05	0.00437167	yes	2.9796	4.80202	chr7:144914469-144914637	q1	q2	OK	103.578	308.621
ENSMUSG00000021957.7	ENSMUSG00000021957.7	Tkt	1.51484	5e-05	0.00437167	yes	2.85767	7.95189	chr14:30548358-30574720	q1	q2	OK	66.2071	189.198
ENSMUSG00000041827.15	ENSMUSG00000041827.15	Oasl1	1.50862	0.00015	0.0107305	yes	2.84538	1.91473	chr5:114917317-114937915	q1	q2	OK	0.201456	0.573218
ENSMUSG00000103103.1	ENSMUSG00000103103.1	4833445I07Rik	1.50613	5e-05	0.00437167	yes	2.84047	2.42979	chr9:108567532-108569174	q1	q2	OK	0.240973	0.68448
ENSMUSG00000086652.1	ENSMUSG00000086652.1	Gm14029	1.5024	0.0006	0.0301687	yes	2.83314	2.30948	chr2:129182481-129183947	q1	q2	OK	0.144249	0.408677
ENSMUSG00000054320.16	ENSMUSG00000054320.16	Lrrc36	1.39343	0.00085	0.0382209	yes	2.62703	1.93892	chr8:105413570-105464086	q1	q2	OK	0.186152	0.489024
ENSMUSG00000038486.9	ENSMUSG00000038486.9	Sv2a	1.39254	5e-05	0.00437167	yes	2.62541	2.65977	chr3:96181150-96195521	q1	q2	OK	0.295651	0.776205
ENSMUSG00000066026.14	ENSMUSG00000066026.14	Dhrs3	1.38856	5e-05	0.00437167	yes	2.61817	4.60714	chr4:144892826-144928209	q1	q2	OK	2.01788	5.28313
ENSMUSG00000049699.4	ENSMUSG00000049699.4	Ucn2	1.37395	5e-05	0.00437167	yes	2.59179	2.69307	chr9:108986009-108987164	q1	q2	OK	0.342169	0.886828
ENSMUSG00000029149.14	ENSMUSG00000029149.14	Krtcap3	1.33257	0.00015	0.0107305	yes	2.51851	2.11205	chr5:31251690-31253202	q1	q2	OK	0.535546	1.34877
ENSMUSG00000051435.11	ENSMUSG00000051435.11	Fhad1	1.30953	0.0002	0.0132252	yes	2.47861	1.95794	chr4:141885653-142015082	q1	q2	OK	0.325938	0.807873
ENSMUSG00000037139.15	ENSMUSG00000037139.15	Myom3	1.22134	5e-05	0.00437167	yes	2.33163	3.66906	chr4:135759714-135815564	q1	q2	OK	0.526434	1.22745
ENSMUSG00000035711.5	ENSMUSG00000035711.5	Dok3	1.22096	5e-05	0.00437167	yes	2.33102	3.13312	chr13:55523230-55529296	q1	q2	OK	0.572582	1.3347
ENSMUSG00000101493.1	ENSMUSG00000101493.1	2810405F17Rik	1.19566	0.00045	0.024937	yes	2.2905	2.14943	chr4:137387265-137388382	q1	q2	OK	0.289546	0.663203
ENSMUSG00000104330.1	ENSMUSG00000104330.1	Gm38285	1.17011	0.0012	0.048055	yes	2.25029	1.96023	chr7:36695437-36696359	q1	q2	OK	0.311023	0.699891
ENSMUSG00000030659.14	ENSMUSG00000030659.14	Nucb2	1.15235	5e-05	0.00437167	yes	2.22276	5.34547	chr7:116504368-116540584	q1	q2	OK	5.74385	12.7672
ENSMUSG00000072915.3	ENSMUSG00000072915.3	Gm12258	1.11952	5e-05	0.00437167	yes	2.17275	2.30793	chr11:58847157-58861956	q1	q2	OK	0.383205	0.832609
ENSMUSG00000008658.16	ENSMUSG00000008658.16	Rbfox1	1.11504	0.0001	0.00771471	yes	2.16601	2.24298	chr16:5885354-7411526	q1	q2	OK	0.534066	1.15679
ENSMUSG00000028217.11	ENSMUSG00000028217.11	Cdh17	1.09067	0.0001	0.00771471	yes	2.12973	2.35251	chr4:11758146-11817895	q1	q2	OK	0.144111	0.306918
ENSMUSG00000027820.12	ENSMUSG00000027820.12	Mme	1.08444	0.00015	0.0107305	yes	2.12055	2.06934	chr3:63241536-63386030	q1	q2	OK	0.475017	1.0073
ENSMUSG00000021678.9	ENSMUSG00000021678.9	F2rl1	1.06968	0.00125	0.0494284	yes	2.09897	2.05324	chr13:95511731-95525227	q1	q2	OK	0.132128	0.277333
ENSMUSG00000002409.18	ENSMUSG00000002409.18	Dyrk1b	1.06397	5e-05	0.00437167	yes	2.09068	4.25527	chr7:28179468-28187294	q1	q2	OK	1.65023	3.45011
ENSMUSG00000025497.15	ENSMUSG00000025497.15	Cdhr5	1.05132	5e-05	0.00437167	yes	2.07243	2.98696	chr7:141269082-141276786	q1	q2	OK	1.45303	3.0113
ENSMUSG00000062078.15	ENSMUSG00000062078.15	Qk	1.03596	5e-05	0.00437167	yes	2.05048	3.30827	chr17:10202600-10319854	q1	q2	OK	127.552	261.542
ENSMUSG00000022382.15	ENSMUSG00000022382.15	Wnt7b	1.00219	5e-05	0.00437167	yes	2.00304	4.7823	chr15:85535436-85593708	q1	q2	OK	3.02937	6.06794
ENSMUSG00000112716.1	ENSMUSG00000112716.1	4930471E19Rik	0.97961	5e-05	0.00437167	yes	1.97193	2.43832	chr10:120632671-120699203	q1	q2	OK	1.4481	2.85556
ENSMUSG00000026841.7	ENSMUSG00000026841.7	Fibcd1	0.966468	5e-05	0.00437167	yes	1.95405	5.20961	chr2:31813289-31846005	q1	q2	OK	3.35855	6.56279
ENSMUSG00000004371.15	ENSMUSG00000004371.15	Il11	0.957193	0.00105	0.0439492	yes	1.94153	1.84121	chr7:4772372-4782859	q1	q2	OK	0.279837	0.543312
ENSMUSG00000046159.16	ENSMUSG00000046159.16	Chrm3	0.955753	5e-05	0.00437167	yes	1.93959	2.35495	chr13:9875485-10830778	q1	q2	OK	0.674761	1.30876
ENSMUSG00000039814.15	ENSMUSG00000039814.15	Xkr5	0.950545	5e-05	0.00437167	yes	1.9326	4.34138	chr8:18932728-18950975	q1	q2	OK	2.34232	4.52677
ENSMUSG00000038517.15	ENSMUSG00000038517.15	Tbkbp1	0.947539	0.0007	0.0332828	yes	1.92858	2.00911	chr11:97136170-97151495	q1	q2	OK	0.663651	1.2799
ENSMUSG00000025475.17	ENSMUSG00000025475.17	Adgra1	0.939906	5e-05	0.00437167	yes	1.9184	4.70643	chr7:139834173-139878088	q1	q2	OK	2.7525	5.28041
ENSMUSG00000022629.17	ENSMUSG00000022629.17	Kif21a	0.934903	0.0001	0.00771471	yes	1.91176	2.40985	chr15:90933275-91049948	q1	q2	OK	2.79312	5.33977
ENSMUSG00000037664.13	ENSMUSG00000037664.13	Cdkn1c	0.926213	0.0005	0.0266746	yes	1.90028	1.91573	chr7:143458338-143461050	q1	q2	OK	0.767194	1.45788
ENSMUSG00000039774.12	ENSMUSG00000039774.12	Galnt12	0.92128	0.0011	0.0450828	yes	1.89379	1.91016	chr4:47091908-47123070	q1	q2	OK	0.216155	0.409353
ENSMUSG00000022156.8	ENSMUSG00000022156.8	Gzme	0.918384	0.0005	0.0266746	yes	1.89	2.11794	chr14:56117625-56120625	q1	q2	OK	0.843845	1.59486
ENSMUSG00000028664.14	ENSMUSG00000028664.14	Ephb2	0.911142	5e-05	0.00437167	yes	1.88053	4.40065	chr4:136647538-136835988	q1	q2	OK	2.67122	5.02333
ENSMUSG00000026443.3	ENSMUSG00000026443.3	Lrrn2	0.903169	0.0001	0.00771471	yes	1.87017	2.3503	chr1:132880272-132940005	q1	q2	OK	0.37928	0.709317
ENSMUSG00000000120.6	ENSMUSG00000000120.6	Ngfr	0.885107	5e-05	0.00437167	yes	1.8469	4.80536	chr11:95568817-95587735	q1	q2	OK	5.53388	10.2205
ENSMUSG00000028841.14	ENSMUSG00000028841.14	Cnksr1	0.877558	5e-05	0.00437167	yes	1.83726	2.51736	chr4:134228040-134238399	q1	q2	OK	0.939177	1.72552
ENSMUSG00000039062.15	ENSMUSG00000039062.15	Anpep	0.874919	5e-05	0.00437167	yes	1.83391	2.77255	chr7:79821802-79861059	q1	q2	OK	2.01143	3.68878
ENSMUSG00000103292.1	ENSMUSG00000103292.1	Gm35048	0.863118	0.0004	0.0230593	yes	1.81897	2.14458	chr1:90520495-90523297	q1	q2	OK	0.294845	0.536313
ENSMUSG00000025494.8	ENSMUSG00000025494.8	Sigirr	0.856789	5e-05	0.00437167	yes	1.811	2.80216	chr7:141091174-141100572	q1	q2	OK	4.51298	8.17301
ENSMUSG00000001227.12	ENSMUSG00000001227.12	Sema6b	0.843941	5e-05	0.00437167	yes	1.79495	4.54717	chr17:56123084-56140343	q1	q2	OK	5.26103	9.44326
ENSMUSG00000092274.3	ENSMUSG00000092274.3	Neat1	0.843712	5e-05	0.00437167	yes	1.79466	4.69921	chr19:5824707-5845478	q1	q2	OK	25.7339	46.1836
ENSMUSG00000025780.7	ENSMUSG00000025780.7	Itih5	0.834323	0.00055	0.0286619	yes	1.78302	2.10502	chr2:10153570-10256529	q1	q2	OK	0.105028	0.187267
ENSMUSG00000023805.17	ENSMUSG00000023805.17	Synj2	0.833112	5e-05	0.00437167	yes	1.78152	2.32111	chr17:5941279-6079741	q1	q2	OK	2.04097	3.63603
ENSMUSG00000038580.13	ENSMUSG00000038580.13	Sct	0.824602	5e-05	0.00437167	yes	1.77105	4.68154	chr7:141278329-141279133	q1	q2	OK	100.295	177.628
ENSMUSG00000056174.8	ENSMUSG00000056174.8	Col8a2	0.821704	0.0005	0.0266746	yes	1.76749	1.62228	chr4:126286792-126314330	q1	q2	OK	0.410616	0.725761
ENSMUSG00000039943.16	ENSMUSG00000039943.16	Plcb4	0.817229	5e-05	0.00437167	yes	1.76202	3.92522	chr2:135659010-136014593	q1	q2	OK	9.71176	17.1123
ENSMUSG00000105703.2	ENSMUSG00000105703.2	Gm43305	0.810532	0.0001	0.00771471	yes	1.75386	2.19331	chr14:54292442-54297456	q1	q2	OK	5.31996	9.33046
ENSMUSG00000018334.18	ENSMUSG00000018334.18	Ksr1	0.806418	0.00015	0.0107305	yes	1.74886	2.43282	chr11:79013439-79146407	q1	q2	OK	6.43146	11.2478
ENSMUSG00000072941.5	ENSMUSG00000072941.5	Sod3	0.804128	5e-05	0.00437167	yes	1.74609	2.46589	chr5:52363790-52371418	q1	q2	OK	0.452416	0.78996
ENSMUSG00000038530.11	ENSMUSG00000038530.11	Rgs4	0.800139	0.00035	0.0203258	yes	1.74127	2.03408	chr1:169741476-169747642	q1	q2	OK	0.38145	0.664207
ENSMUSG00000004347.17	ENSMUSG00000004347.17	Pde1c	0.790957	0.0012	0.048055	yes	1.73022	1.59006	chr6:56069803-56652487	q1	q2	OK	0.581058	1.00536
ENSMUSG00000037580.10	ENSMUSG00000037580.10	Gch1	0.789541	5e-05	0.00437167	yes	1.72852	2.93566	chr14:47153894-47189413	q1	q2	OK	1.10169	1.9043
ENSMUSG00000049916.12	ENSMUSG00000049916.12	2610318N02Rik	0.789344	0.0011	0.0450828	yes	1.72829	1.848	chr16:17113397-17125167	q1	q2	OK	1.53779	2.65774
ENSMUSG00000029094.12	ENSMUSG00000029094.12	Afap1	0.773807	0.00025	0.0158649	yes	1.70978	2.56569	chr5:35893318-36003923	q1	q2	OK	9.91369	16.9502
ENSMUSG00000056313.5	ENSMUSG00000056313.5	Tcim	0.766513	5e-05	0.00437167	yes	1.70115	3.20388	chr8:24422403-24440008	q1	q2	OK	2.82529	4.80625
ENSMUSG00000041923.15	ENSMUSG00000041923.15	Nol4	0.75546	5e-05	0.00437167	yes	1.68817	1.99882	chr18:22693180-23041653	q1	q2	OK	4.58828	7.74581
ENSMUSG00000064141.14	ENSMUSG00000064141.14	Zfp69	0.747646	0.0001	0.00771471	yes	1.67905	2.10185	chr4:120930136-120951699	q1	q2	OK	0.988352	1.65949
ENSMUSG00000102813.1	ENSMUSG00000102813.1	Gm37795	0.741012	5e-05	0.00437167	yes	1.67135	3.62624	chr4:150068453-150070997	q1	q2	OK	4.13118	6.90465
ENSMUSG00000045404.16	ENSMUSG00000045404.16	Kcnk13	0.733271	0.0006	0.0301687	yes	1.6624	1.89896	chr12:99964498-100062682	q1	q2	OK	0.369446	0.614168
ENSMUSG00000034981.9	ENSMUSG00000034981.9	Parm1	0.7303	0.00125	0.0494284	yes	1.65898	1.93477	chr5:91517614-91626894	q1	q2	OK	0.20479	0.339744
ENSMUSG00000080316.11	ENSMUSG00000080316.11	Spaca6	0.724269	5e-05	0.00437167	yes	1.65206	2.47443	chr17:17827157-17843009	q1	q2	OK	16.2819	26.8987
ENSMUSG00000040035.14	ENSMUSG00000040035.14	Disp2	0.720599	5e-05	0.00437167	yes	1.64787	3.61045	chr2:118779718-118811293	q1	q2	OK	2.26725	3.73613
ENSMUSG00000090086.7	ENSMUSG00000090086.7	AI480526	0.718481	0.0001	0.00771471	yes	1.64545	2.28012	chr5:123133722-123141666	q1	q2	OK	6.28096	10.335
ENSMUSG00000116632.1	ENSMUSG00000116632.1	Magef1	0.713604	0.00125	0.0494284	yes	1.6399	1.84404	chr16:21331901-21333356	q1	q2	OK	2.79776	4.58804
ENSMUSG00000052563.13	ENSMUSG00000052563.13	D930048N14Rik	0.708548	5e-05	0.00437167	yes	1.63416	2.45586	chr11:51650953-51657681	q1	q2	OK	0.707305	1.15585
ENSMUSG00000051855.15	ENSMUSG00000051855.15	Mest	0.702253	5e-05	0.00437167	yes	1.62704	3.06569	chr6:30723546-30896794	q1	q2	OK	26.456	43.0451
ENSMUSG00000031137.17	ENSMUSG00000031137.17	Fgf13	0.70045	0.00025	0.0158649	yes	1.62501	2.22122	chrX:59062144-59568071	q1	q2	OK	9.19198	14.9371
ENSMUSG00000043993.6	ENSMUSG00000043993.6	2900052L18Rik	0.696412	0.0007	0.0332828	yes	1.62047	2.06575	chr11:120229801-120231585	q1	q2	OK	1.00919	1.63536
ENSMUSG00000052675.11	ENSMUSG00000052675.11	Zfp112	0.691133	5e-05	0.00437167	yes	1.61455	2.34143	chr7:24112313-24127952	q1	q2	OK	0.874763	1.41235
ENSMUSG00000020758.15	ENSMUSG00000020758.15	Itgb4	0.690507	5e-05	0.00437167	yes	1.61385	3.20454	chr11:115974708-116008412	q1	q2	OK	39.463	63.6874
ENSMUSG00000045763.8	ENSMUSG00000045763.8	Basp1	0.675564	5e-05	0.00437167	yes	1.59722	2.463	chr15:25363276-25413764	q1	q2	OK	2.01043	3.2111
ENSMUSG00000009097.10	ENSMUSG00000009097.10	Tbx1	0.669624	5e-05	0.00437167	yes	1.59066	3.14722	chr16:18580978-18590671	q1	q2	OK	4.91758	7.82219
ENSMUSG00000028464.16	ENSMUSG00000028464.16	Tpm2	0.664685	5e-05	0.00437167	yes	1.58522	3.8484	chr4:43514710-43523765	q1	q2	OK	76.1036	120.641
ENSMUSG00000033565.18	ENSMUSG00000033565.18	Rbfox2	0.661648	5e-05	0.00437167	yes	1.58189	3.06341	chr15:77078989-77307004	q1	q2	OK	44.0503	69.6827
ENSMUSG00000028937.14	ENSMUSG00000028937.14	Acot7	0.660474	5e-05	0.00437167	yes	1.5806	4.02228	chr4:152178133-152271855	q1	q2	OK	89.8096	141.953
ENSMUSG00000022887.9	ENSMUSG00000022887.9	Masp1	0.658851	5e-05	0.00437167	yes	1.57882	3.56008	chr16:23449416-23614222	q1	q2	OK	9.68945	15.2979
ENSMUSG00000019790.17	ENSMUSG00000019790.17	Stxbp5	0.652839	5e-05	0.00437167	yes	1.57226	3.04504	chr10:9755546-9901079	q1	q2	OK	8.77673	13.7993
ENSMUSG00000047250.13	ENSMUSG00000047250.13	Ptgs1	0.64856	5e-05	0.00437167	yes	1.5676	2.33056	chr2:36230425-36252272	q1	q2	OK	6.87002	10.7695
ENSMUSG00000046733.7	ENSMUSG00000046733.7	Gprc5a	0.641858	5e-05	0.00437167	yes	1.56034	3.31697	chr6:135065650-135084709	q1	q2	OK	6.84293	10.6773
ENSMUSG00000021379.2	ENSMUSG00000021379.2	Id4	0.635347	5e-05	0.00437167	yes	1.55331	2.28797	chr13:48044230-48266026	q1	q2	OK	0.723376	1.12363
ENSMUSG00000040690.15	ENSMUSG00000040690.15	Col16a1	0.628428	0.0001	0.00771471	yes	1.54588	1.8791	chr4:130047839-130099283	q1	q2	OK	3.15334	4.87469
ENSMUSG00000028581.17	ENSMUSG00000028581.17	Laptm5	0.622911	5e-05	0.00437167	yes	1.53998	2.60248	chr4:130913124-130936141	q1	q2	OK	12.9442	19.9339
ENSMUSG00000044288.6	ENSMUSG00000044288.6	Cnr1	0.622104	5e-05	0.00437167	yes	1.53912	2.27358	chr4:33924592-33948831	q1	q2	OK	0.681308	1.04861
ENSMUSG00000046318.16	ENSMUSG00000046318.16	Ccbe1	0.618311	0.00065	0.0316709	yes	1.53508	1.91282	chr18:66045301-66319645	q1	q2	OK	0.479468	0.736021
ENSMUSG00000016179.11	ENSMUSG00000016179.11	Camk1g	0.612966	5e-05	0.00437167	yes	1.5294	2.58932	chr1:193346345-193370298	q1	q2	OK	4.0258	6.15706
ENSMUSG00000106847.1	ENSMUSG00000106847.1	Peg13	0.610388	0.0005	0.0266746	yes	1.52667	2.05519	chr15:72588282-73061204	q1	q2	OK	2.56358	3.91374
ENSMUSG00000036545.9	ENSMUSG00000036545.9	Adamts2	0.60107	0.0002	0.0132252	yes	1.51684	1.89481	chr11:50599297-50807573	q1	q2	OK	1.11724	1.69468
ENSMUSG00000039158.11	ENSMUSG00000039158.11	Akna	0.594829	5e-05	0.00437167	yes	1.51029	3.09127	chr4:63367124-63403354	q1	q2	OK	2.56774	3.87804
ENSMUSG00000043165.7	ENSMUSG00000043165.7	Lor	0.593629	0.0003	0.0181592	yes	1.50904	2.21448	chr3:92080270-92083142	q1	q2	OK	1.9631	2.96238
ENSMUSG00000029096.15	ENSMUSG00000029096.15	Htra3	0.583501	0.00025	0.0158649	yes	1.49848	2.11718	chr5:35652022-35679782	q1	q2	OK	9.16138	13.7282
ENSMUSG00000028469.15	ENSMUSG00000028469.15	Npr2	0.579149	5e-05	0.00437167	yes	1.49397	2.50547	chr4:43631424-43651244	q1	q2	OK	10.151	15.1652
ENSMUSG00000028980.14	ENSMUSG00000028980.14	H6pd	0.574017	5e-05	0.00437167	yes	1.48866	2.10514	chr4:149979474-150009023	q1	q2	OK	20.7149	30.8375
ENSMUSG00000043670.4	ENSMUSG00000043670.4	Diras1	0.568815	0.00015	0.0107305	yes	1.4833	2.29522	chr10:81019588-81026567	q1	q2	OK	1.88467	2.79554
ENSMUSG00000044456.16	ENSMUSG00000044456.16	Rin3	0.566722	5e-05	0.00437167	yes	1.48115	3.23529	chr12:102283047-102390855	q1	q2	OK	11.3136	16.7572
ENSMUSG00000099906.2	ENSMUSG00000099906.2	Gm28653	0.565459	0.0004	0.0230593	yes	1.47986	1.84189	chr1:20669881-20684298	q1	q2	OK	1.42063	2.10233
ENSMUSG00000095687.2	ENSMUSG00000095687.2	Rnaset2a	0.564405	5e-05	0.00437167	yes	1.47878	2.8313	chr17:7982521-8148097	q1	q2	OK	9.24629	13.6732
ENSMUSG00000031557.16	ENSMUSG00000031557.16	Plekha2	0.560484	5e-05	0.00437167	yes	1.47476	2.81388	chr8:25024928-25109986	q1	q2	OK	9.60429	14.1641
ENSMUSG00000039385.5	ENSMUSG00000039385.5	Cdh6	0.559604	5e-05	0.00437167	yes	1.47386	3.2746	chr15:13028700-13173675	q1	q2	OK	4.52505	6.66931
ENSMUSG00000089762.3	ENSMUSG00000089762.3	Ier5l	0.556956	5e-05	0.00437167	yes	1.47116	3.27613	chr2:30471536-30474219	q1	q2	OK	15.3877	22.6377
ENSMUSG00000040964.16	ENSMUSG00000040964.16	Arhgef10l	0.551082	5e-05	0.00437167	yes	1.46518	2.80678	chr4:140514484-140666012	q1	q2	OK	5.88375	8.62078
ENSMUSG00000047501.3	ENSMUSG00000047501.3	Cldn4	0.548905	5e-05	0.00437167	yes	1.46297	2.72075	chr5:134945118-134946934	q1	q2	OK	6.36613	9.31348
ENSMUSG00000035314.10	ENSMUSG00000035314.10	Gdpd5	0.547321	5e-05	0.00437167	yes	1.46137	2.16929	chr7:99381413-99461877	q1	q2	OK	10.5133	15.3638
ENSMUSG00000060470.7	ENSMUSG00000060470.7	Adgrg3	0.539182	5e-05	0.00437167	yes	1.45315	2.42121	chr8:95017691-95045250	q1	q2	OK	21.9929	31.959
ENSMUSG00000029816.10	ENSMUSG00000029816.10	Gpnmb	0.534477	0.00045	0.024937	yes	1.44842	2.10821	chr6:49036545-49070929	q1	q2	OK	3.14658	4.55755
ENSMUSG00000044468.14	ENSMUSG00000044468.14	Tent5c	0.531902	0.00105	0.0439492	yes	1.44583	1.73701	chr3:100451627-100489324	q1	q2	OK	0.670382	0.969261
ENSMUSG00000055447.19	ENSMUSG00000055447.19	Cd47	0.529463	5e-05	0.00437167	yes	1.44339	2.47802	chr16:49800532-49915010	q1	q2	OK	20.2195	29.1847
ENSMUSG00000033669.8	ENSMUSG00000033669.8	Zfp7	0.526685	5e-05	0.00437167	yes	1.44062	2.18026	chr15:76879258-76901305	q1	q2	OK	10.5804	15.2423
ENSMUSG00000040694.4	ENSMUSG00000040694.4	Apobec2	0.52548	5e-05	0.00437167	yes	1.43941	2.1765	chr17:48417279-48432930	q1	q2	OK	11.1659	16.0724
ENSMUSG00000049907.8	ENSMUSG00000049907.8	Rasl11b	0.520594	0.0005	0.0266746	yes	1.43455	1.89758	chr5:74195285-74199481	q1	q2	OK	2.54563	3.65183
ENSMUSG00000068335.6	ENSMUSG00000068335.6	Dok1	0.517074	0.00095	0.0411876	yes	1.43105	1.9946	chr6:83030933-83033471	q1	q2	OK	12.187	17.4402
ENSMUSG00000024501.20	ENSMUSG00000024501.20	Dpysl3	0.515851	5e-05	0.00437167	yes	1.42984	2.95356	chr18:43320983-43438286	q1	q2	OK	88.1983	126.109
ENSMUSG00000074738.2	ENSMUSG00000074738.2	Fndc10	0.506174	0.0002	0.0132252	yes	1.42028	2.17605	chr4:155694341-155696481	q1	q2	OK	2.78756	3.95911
ENSMUSG00000032232.14	ENSMUSG00000032232.14	Cgnl1	0.505959	0.00035	0.0203258	yes	1.42007	1.88666	chr9:71626508-71771602	q1	q2	OK	2.6549	3.77013
ENSMUSG00000020262.15	ENSMUSG00000020262.15	Adarb1	0.505874	5e-05	0.00437167	yes	1.41998	2.50579	chr10:77290725-77418270	q1	q2	OK	15.16	21.527
ENSMUSG00000097296.1	ENSMUSG00000097296.1	Gm26532	0.500412	0.0001	0.00771471	yes	1.41462	2.19983	chr8:84208814-84209609	q1	q2	OK	12.671	17.9246
ENSMUSG00000022221.14	ENSMUSG00000022221.14	Ripk3	0.498904	0.0001	0.00771471	yes	1.41314	2.23351	chr14:55784994-55788865	q1	q2	OK	5.0962	7.20164
ENSMUSG00000043102.2	ENSMUSG00000043102.2	Qrfp	0.498863	0.0002	0.0132252	yes	1.4131	2.12793	chr2:31806165-31810580	q1	q2	OK	1.94455	2.74784
ENSMUSG00000046229.10	ENSMUSG00000046229.10	Scand1	0.492992	0.00095	0.0411876	yes	1.40736	2.13411	chr2:156311845-156375638	q1	q2	OK	20.2836	28.5464
ENSMUSG00000044461.6	ENSMUSG00000044461.6	Shisa2	0.489332	5e-05	0.00437167	yes	1.40379	2.49476	chr14:59625307-59631660	q1	q2	OK	5.19335	7.2904
ENSMUSG00000042821.7	ENSMUSG00000042821.7	Snai1	0.479813	5e-05	0.00437167	yes	1.39456	2.93109	chr2:167538194-167542814	q1	q2	OK	40.7664	56.8513
ENSMUSG00000049932.3	ENSMUSG00000049932.3	H2ax	0.479549	5e-05	0.00437167	yes	1.39431	2.95647	chr9:44334693-44336077	q1	q2	OK	80.8425	112.719
ENSMUSG00000050666.14	ENSMUSG00000050666.14	Vstm4	0.478495	0.0003	0.0181592	yes	1.39329	2.08069	chr14:32856755-32939491	q1	q2	OK	2.26892	3.16127
ENSMUSG00000031431.13	ENSMUSG00000031431.13	Tsc22d3	0.478372	5e-05	0.00437167	yes	1.39317	2.50798	chrX:140539527-140600659	q1	q2	OK	8.71183	12.1371
ENSMUSG00000032177.17	ENSMUSG00000032177.17	Pde4a	0.474498	5e-05	0.00437167	yes	1.38943	2.39177	chr9:21165713-21213248	q1	q2	OK	2.90169	4.03171
ENSMUSG00000031451.6	ENSMUSG00000031451.6	Gas6	0.46872	5e-05	0.00437167	yes	1.38388	2.8523	chr8:13435188-13494490	q1	q2	OK	39.8713	55.1771
ENSMUSG00000018672.15	ENSMUSG00000018672.15	Copz2	0.46651	0.00045	0.024937	yes	1.38176	1.98182	chr11:96849869-96861203	q1	q2	OK	7.97706	11.0224
ENSMUSG00000103593.1	ENSMUSG00000103593.1	Gm37352	0.461603	0.0003	0.0181592	yes	1.37707	2.03704	chr8:84200868-84203049	q1	q2	OK	3.36052	4.62767
ENSMUSG00000027796.2	ENSMUSG00000027796.2	Smad9	0.460673	5e-05	0.00437167	yes	1.37618	2.3083	chr3:54755581-54801257	q1	q2	OK	2.13127	2.93302
ENSMUSG00000055148.7	ENSMUSG00000055148.7	Klf2	0.459175	0.0003	0.0181592	yes	1.37476	2.08346	chr8:72319032-72321656	q1	q2	OK	4.49863	6.18452
ENSMUSG00000032816.15	ENSMUSG00000032816.15	Igdcc4	0.458843	5e-05	0.00437167	yes	1.37444	2.15359	chr9:65101485-65137940	q1	q2	OK	4.01205	5.51432
ENSMUSG00000071076.6	ENSMUSG00000071076.6	Jund	0.45643	5e-05	0.00437167	yes	1.37214	2.45961	chr8:70698948-70700616	q1	q2	OK	12.5168	17.1749
ENSMUSG00000029869.7	ENSMUSG00000029869.7	Ephb6	0.45629	0.00035	0.0203258	yes	1.37201	1.91803	chr6:41605481-41620509	q1	q2	OK	1.85463	2.54457
ENSMUSG00000059013.12	ENSMUSG00000059013.12	Sh2d3c	0.453289	0.00075	0.0350252	yes	1.36916	1.86162	chr2:32721054-32755512	q1	q2	OK	2.62496	3.59399
ENSMUSG00000020715.9	ENSMUSG00000020715.9	Ern1	0.452341	0.00015	0.0107305	yes	1.36826	2.26131	chr11:106394649-106487852	q1	q2	OK	9.96244	13.6312
ENSMUSG00000059456.13	ENSMUSG00000059456.13	Ptk2b	0.452187	0.0009	0.0397871	yes	1.36811	1.96229	chr14:66153256-66281052	q1	q2	OK	2.13294	2.9181
ENSMUSG00000033213.16	ENSMUSG00000033213.16	AA467197	0.451014	0.00045	0.024937	yes	1.367	2.05223	chr2:122636985-122641191	q1	q2	OK	13.0746	17.873
ENSMUSG00000024921.17	ENSMUSG00000024921.17	Smarca2	0.449291	0.00115	0.0464069	yes	1.36537	1.84796	chr19:26605049-26823907	q1	q2	OK	14.3102	19.5388
ENSMUSG00000037419.9	ENSMUSG00000037419.9	Endod1	0.447707	0.0003	0.0181592	yes	1.36387	1.97715	chr9:14353989-14381507	q1	q2	OK	5.59729	7.63398
ENSMUSG00000023391.8	ENSMUSG00000023391.8	Dlx2	0.446077	0.0003	0.0181592	yes	1.36233	2.03154	chr2:71543407-71546754	q1	q2	OK	10.8798	14.8219
ENSMUSG00000096472.2	ENSMUSG00000096472.2	Cdkn2d	0.438786	0.00025	0.0158649	yes	1.35546	2.09743	chr9:21288409-21291407	q1	q2	OK	9.79194	13.2726
ENSMUSG00000026249.10	ENSMUSG00000026249.10	Serpine2	0.43874	5e-05	0.00437167	yes	1.35542	2.28152	chr1:79794196-79861180	q1	q2	OK	45.1348	61.1767
ENSMUSG00000038175.10	ENSMUSG00000038175.10	Mylip	0.433193	0.00105	0.0439492	yes	1.35022	1.85956	chr13:45389741-45412022	q1	q2	OK	1.97212	2.6628
ENSMUSG00000003344.14	ENSMUSG00000003344.14	Btbd2	0.43285	0.00055	0.0286619	yes	1.3499	2.01938	chr10:80642616-80657071	q1	q2	OK	9.97075	13.4595
ENSMUSG00000030782.17	ENSMUSG00000030782.17	Tgfb1i1	0.431653	5e-05	0.00437167	yes	1.34878	2.58224	chr7:128246811-128255699	q1	q2	OK	37.9229	51.1495
ENSMUSG00000024134.11	ENSMUSG00000024134.11	Six2	0.429777	0.00045	0.024937	yes	1.34703	1.99395	chr17:85684276-85688274	q1	q2	OK	4.04962	5.45494
ENSMUSG00000029385.14	ENSMUSG00000029385.14	Ccng2	0.427324	0.0006	0.0301687	yes	1.34474	1.95088	chr5:93267256-93276231	q1	q2	OK	7.4686	10.0433
ENSMUSG00000022358.7	ENSMUSG00000022358.7	Fbxo32	0.425122	0.00095	0.0411876	yes	1.34269	1.93598	chr15:58175878-58324169	q1	q2	OK	1.0457	1.40405
ENSMUSG00000032122.15	ENSMUSG00000032122.15	Slc37a2	0.424757	0.00045	0.024937	yes	1.34235	2.00382	chr9:37227584-37256149	q1	q2	OK	4.35841	5.8505
ENSMUSG00000038037.5	ENSMUSG00000038037.5	Socs1	0.421356	0.001	0.0425351	yes	1.33919	1.93137	chr16:10782239-10785536	q1	q2	OK	2.93142	3.92572
ENSMUSG00000027805.16	ENSMUSG00000027805.16	Pfn2	0.421233	0.00015	0.0107305	yes	1.33907	2.1865	chr3:57841894-57848079	q1	q2	OK	9.58356	12.8331
ENSMUSG00000098557.1	ENSMUSG00000098557.1	Kctd12	0.421037	5e-05	0.00437167	yes	1.33889	2.57337	chr14:102976580-102982637	q1	q2	OK	23.1805	31.0362
ENSMUSG00000033542.13	ENSMUSG00000033542.13	Arhgef5	0.420608	0.00065	0.0316709	yes	1.33849	1.82855	chr6:43264541-43289320	q1	q2	OK	8.9471	11.9756
ENSMUSG00000024907.7	ENSMUSG00000024907.7	Gal	0.419896	5e-05	0.00437167	yes	1.33783	2.6229	chr19:3409914-3414544	q1	q2	OK	621.306	831.203
ENSMUSG00000019768.16	ENSMUSG00000019768.16	Esr1	0.419334	0.0009	0.0397871	yes	1.33731	1.90713	chr10:4611592-5005614	q1	q2	OK	5.52403	7.38734
ENSMUSG00000059555.6	ENSMUSG00000059555.6	Tor4a	0.417676	0.0002	0.0132252	yes	1.33577	2.0793	chr2:25192965-25196886	q1	q2	OK	4.68145	6.25336
ENSMUSG00000028743.7	ENSMUSG00000028743.7	Akr7a5	0.417272	0.0002	0.0132252	yes	1.3354	2.22146	chr4:139310743-139318426	q1	q2	OK	15.2301	20.3382
ENSMUSG00000015937.15	ENSMUSG00000015937.15	Macroh2a1	0.417098	0.0002	0.0132252	yes	1.33524	2.18878	chr13:55825050-56136361	q1	q2	OK	99.445	132.783
ENSMUSG00000029016.13	ENSMUSG00000029016.13	Clcn6	0.413342	0.0006	0.0301687	yes	1.33177	1.77665	chr4:148004258-148038821	q1	q2	OK	3.4884	4.64574
ENSMUSG00000046447.3	ENSMUSG00000046447.3	Camk2n1	0.410726	0.00085	0.0382209	yes	1.32935	2.02907	chr4:138454313-138460123	q1	q2	OK	2.45692	3.26612
ENSMUSG00000000957.11	ENSMUSG00000000957.11	Mmp14	0.409943	5e-05	0.00437167	yes	1.32863	2.41752	chr14:54431611-54445364	q1	q2	OK	46.5245	61.8139
ENSMUSG00000026748.13	ENSMUSG00000026748.13	Plxdc2	0.408656	0.0009	0.0397871	yes	1.32745	1.93988	chr2:16356303-16755839	q1	q2	OK	7.97288	10.5836
ENSMUSG00000021585.10	ENSMUSG00000021585.10	Cast	0.406455	0.0006	0.0301687	yes	1.32542	1.78964	chr13:74639567-74808810	q1	q2	OK	34.7105	46.0061
ENSMUSG00000053137.7	ENSMUSG00000053137.7	Mapk11	0.406212	0.0008	0.0367067	yes	1.3252	1.83777	chr15:89142485-89149628	q1	q2	OK	3.43255	4.54883
ENSMUSG00000033088.19	ENSMUSG00000033088.19	Triobp	0.405582	0.00075	0.0350252	yes	1.32462	1.94006	chr15:78947723-79011041	q1	q2	OK	8.72728	11.5604
ENSMUSG00000026456.18	ENSMUSG00000026456.18	Cyb5r1	0.404742	0.0001	0.00771471	yes	1.32385	2.20309	chr1:134405558-134411740	q1	q2	OK	42.573	56.3603
ENSMUSG00000019467.15	ENSMUSG00000019467.15	Arhgef25	0.403442	0.0008	0.0367067	yes	1.32266	1.80554	chr10:127182524-127190083	q1	q2	OK	13.771	18.2143
ENSMUSG00000037266.18	ENSMUSG00000037266.18	Rsrp1	0.400423	0.00065	0.0316709	yes	1.31989	1.91749	chr4:134923591-134927671	q1	q2	OK	52.4358	69.2097
ENSMUSG00000028019.9	ENSMUSG00000028019.9	Pdgfc	0.40012	5e-05	0.00437167	yes	1.31962	2.20705	chr3:81036415-81214040	q1	q2	OK	6.99338	9.22859
ENSMUSG00000066595.9	ENSMUSG00000066595.9	Flvcr1	0.394118	0.00035	0.0203258	yes	1.31414	1.95142	chr1:191005846-191029781	q1	q2	OK	10.0982	13.2705
ENSMUSG00000020484.19	ENSMUSG00000020484.19	Xbp1	0.393529	0.00025	0.0158649	yes	1.3136	2.26775	chr11:5520658-5525893	q1	q2	OK	41.7348	54.823
ENSMUSG00000031508.14	ENSMUSG00000031508.14	Ankrd10	0.393449	0.00015	0.0107305	yes	1.31353	2.25563	chr8:11611582-11635757	q1	q2	OK	82.9021	108.894
ENSMUSG00000004791.7	ENSMUSG00000004791.7	Pgf	0.392326	0.0002	0.0132252	yes	1.31251	2.17913	chr12:85166634-85177790	q1	q2	OK	22.3861	29.382
ENSMUSG00000001020.8	ENSMUSG00000001020.8	S100a4	0.390934	5e-05	0.00437167	yes	1.31124	2.43316	chr3:90560362-90606045	q1	q2	OK	1492.18	1956.6
ENSMUSG00000036867.7	ENSMUSG00000036867.7	Smad6	0.38763	0.0002	0.0132252	yes	1.30824	2.02976	chr9:63953075-64022059	q1	q2	OK	7.14633	9.34913
ENSMUSG00000031762.7	ENSMUSG00000031762.7	Mt2	0.384007	0.0005	0.0266746	yes	1.30496	2.09091	chr8:94170747-94173568	q1	q2	OK	83.5013	108.966
ENSMUSG00000038481.13	ENSMUSG00000038481.13	Cdk19	0.383581	0.0008	0.0367067	yes	1.30458	1.9068	chr10:40339563-40483818	q1	q2	OK	4.45621	5.81347
ENSMUSG00000037568.12	ENSMUSG00000037568.12	Vash2	0.379995	0.001	0.0425351	yes	1.30134	2.00543	chr1:190947645-190979296	q1	q2	OK	9.21241	11.9885
ENSMUSG00000038648.5	ENSMUSG00000038648.5	Creb3l2	0.377421	0.0005	0.0266746	yes	1.29902	2.08089	chr6:37327254-37442146	q1	q2	OK	11.1049	14.4255
ENSMUSG00000022676.7	ENSMUSG00000022676.7	Snai2	0.375932	0.0003	0.0181592	yes	1.29768	2.25454	chr16:14705851-14709385	q1	q2	OK	24.0409	31.1973
ENSMUSG00000029249.15	ENSMUSG00000029249.15	Rest	0.37462	5e-05	0.00437167	yes	1.2965	2.28587	chr5:77265490-77286432	q1	q2	OK	8.81195	11.4247
ENSMUSG00000045136.6	ENSMUSG00000045136.6	Tubb2b	0.373524	0.00025	0.0158649	yes	1.29551	1.98492	chr13:34126747-34130466	q1	q2	OK	13.5068	17.4983
ENSMUSG00000063415.12	ENSMUSG00000063415.12	Cyp26b1	0.371698	0.0002	0.0132252	yes	1.29387	2.15581	chr6:84571413-84593908	q1	q2	OK	7.17435	9.28271
ENSMUSG00000030301.17	ENSMUSG00000030301.17	Ccdc91	0.371623	0.00075	0.0350252	yes	1.29381	1.80705	chr6:147438361-147632612	q1	q2	OK	11.9591	15.4728
ENSMUSG00000017631.19	ENSMUSG00000017631.19	Abr	0.368095	0.0002	0.0132252	yes	1.29065	2.07115	chr11:76416733-76623558	q1	q2	OK	14.199	18.3259
ENSMUSG00000049307.6	ENSMUSG00000049307.6	Fut4	0.366612	0.00045	0.024937	yes	1.28932	2.03804	chr9:14748319-14752393	q1	q2	OK	5.58729	7.20382
ENSMUSG00000056708.5	ENSMUSG00000056708.5	Ier5	0.365815	0.0002	0.0132252	yes	1.28861	1.99714	chr1:155096360-155099636	q1	q2	OK	6.10234	7.86353
ENSMUSG00000067787.10	ENSMUSG00000067787.10	Blcap	0.361238	0.00065	0.0316709	yes	1.28453	1.76672	chr2:157556361-157571274	q1	q2	OK	36.6521	47.0806
ENSMUSG00000074457.10	ENSMUSG00000074457.10	S100a16	0.361183	0.00025	0.0158649	yes	1.28448	2.08855	chr3:90537253-90543151	q1	q2	OK	94.9376	121.945
ENSMUSG00000028378.6	ENSMUSG00000028378.6	Ptgr1	0.361155	0.0002	0.0132252	yes	1.28445	2.28177	chr4:58965438-58987119	q1	q2	OK	80.1389	102.935
ENSMUSG00000072623.6	ENSMUSG00000072623.6	Zfp9	0.359586	0.00115	0.0464069	yes	1.28306	1.86124	chr6:118461949-118479320	q1	q2	OK	3.80141	4.87743
ENSMUSG00000028799.15	ENSMUSG00000028799.15	Zfp362	0.356788	0.0012	0.048055	yes	1.28057	1.7134	chr4:128773087-128806045	q1	q2	OK	8.27519	10.597
ENSMUSG00000030203.17	ENSMUSG00000030203.17	Dusp16	0.356412	0.00085	0.0382209	yes	1.28024	1.81802	chr6:134715467-134792625	q1	q2	OK	4.69618	6.01223
ENSMUSG00000029068.16	ENSMUSG00000029068.16	Ccnl2	0.354981	0.00095	0.0411876	yes	1.27897	2.01235	chr4:155812488-155824543	q1	q2	OK	45.9149	58.7237
ENSMUSG00000092837.1	ENSMUSG00000092837.1	Rpph1	0.354946	0.0011	0.0450828	yes	1.27894	1.85478	chr14:50789247-50807767	q1	q2	OK	142.761	182.583
ENSMUSG00000046785.8	ENSMUSG00000046785.8	Epm2aip1	0.354282	0.00045	0.024937	yes	1.27835	2.01415	chr9:111271928-111279093	q1	q2	OK	5.80208	7.41709
ENSMUSG00000030122.12	ENSMUSG00000030122.12	Ptms	0.35368	0.00085	0.0382209	yes	1.27782	1.95978	chr6:124913680-124925844	q1	q2	OK	355.862	454.726
ENSMUSG00000041926.15	ENSMUSG00000041926.15	Rnpep	0.353104	0.0005	0.0266746	yes	1.27731	1.93581	chr1:135248560-135284084	q1	q2	OK	23.9265	30.5615
ENSMUSG00000031807.10	ENSMUSG00000031807.10	Pgls	0.352042	0.0006	0.0301687	yes	1.27637	1.97641	chr8:71592175-71607936	q1	q2	OK	58.713	74.9392
ENSMUSG00000022048.8	ENSMUSG00000022048.8	Dpysl2	0.342895	0.00085	0.0382209	yes	1.2683	1.90038	chr14:66802863-66868688	q1	q2	OK	4.7829	6.06615
ENSMUSG00000054675.5	ENSMUSG00000054675.5	Tmem119	0.342739	0.00115	0.0464069	yes	1.26816	1.59142	chr5:113793728-113800516	q1	q2	OK	17.3467	21.9985
ENSMUSG00000015944.9	ENSMUSG00000015944.9	Castor2	0.342271	0.00015	0.0107305	yes	1.26775	1.85235	chr5:134099710-134144343	q1	q2	OK	5.4547	6.9152
ENSMUSG00000006360.11	ENSMUSG00000006360.11	Crip1	0.341566	0.0008	0.0367067	yes	1.26713	2.00379	chr12:113146315-113153879	q1	q2	OK	170.763	216.379
ENSMUSG00000050335.17	ENSMUSG00000050335.17	Lgals3	0.338545	0.00075	0.0350252	yes	1.26448	1.61327	chr14:47367750-47386160	q1	q2	OK	50.3933	63.7213
ENSMUSG00000025372.16	ENSMUSG00000025372.16	Baiap2	0.338146	0.00035	0.0203258	yes	1.26413	2.01403	chr11:119942762-120006782	q1	q2	OK	26.1348	33.0378
ENSMUSG00000067071.8	ENSMUSG00000067071.8	Hes6	0.335898	0.0002	0.0132252	yes	1.26216	2.08278	chr1:91411482-91414038	q1	q2	OK	248.589	313.76
ENSMUSG00000037573.5	ENSMUSG00000037573.5	Tob1	0.331677	0.0005	0.0266746	yes	1.25848	1.94156	chr11:94211453-94215495	q1	q2	OK	15.9933	20.1272
ENSMUSG00000002265.17	ENSMUSG00000002265.17	Peg3	0.326106	0.00035	0.0203258	yes	1.25363	1.99973	chr7:6703891-6730431	q1	q2	OK	55.8627	70.0308
ENSMUSG00000039740.6	ENSMUSG00000039740.6	Alg2	0.323595	0.00105	0.0439492	yes	1.25145	1.85986	chr4:47465066-47474333	q1	q2	OK	12.991	16.2575
ENSMUSG00000063146.11	ENSMUSG00000063146.11	Clip2	0.320667	0.0011	0.0450828	yes	1.24891	1.87927	chr5:134489382-134560171	q1	q2	OK	7.15329	8.9338
ENSMUSG00000044533.15	ENSMUSG00000044533.15	Rps2	0.318277	0.00125	0.0494284	yes	1.24684	1.80817	chr17:24718115-24721929	q1	q2	OK	2185.25	2724.66
ENSMUSG00000041995.8	ENSMUSG00000041995.8	Zbed3	0.318198	0.0011	0.0450828	yes	1.24677	1.88882	chr13:95323611-95337841	q1	q2	OK	28.037	34.9557
ENSMUSG00000029552.19	ENSMUSG00000029552.19	Tes	0.316942	0.0006	0.0301687	yes	1.24569	1.93542	chr6:17065009-17171833	q1	q2	OK	31.8084	39.6233
ENSMUSG00000028843.8	ENSMUSG00000028843.8	Sh3bgrl3	0.310844	0.0009	0.0397871	yes	1.24043	1.83462	chr4:134102569-134128789	q1	q2	OK	87.2971	108.286
ENSMUSG00000060143.7	ENSMUSG00000060143.7	Gm10076	0.30911	0.00065	0.0316709	yes	1.23894	1.95872	chr14:105681827-105682211	q1	q2	OK	1217.41	1508.3
ENSMUSG00000040322.10	ENSMUSG00000040322.10	Slc25a24	0.292474	0.00115	0.0464069	yes	1.22474	1.7565	chr3:109123148-109168457	q1	q2	OK	34.8014	42.6226
ENSMUSG00000079215.8	ENSMUSG00000079215.8	Zfp664	-0.290928	0.00125	0.0494284	yes	0.817376	-1.81497	chr5:124862690-124902693	q1	q2	OK	40.2377	32.8893
ENSMUSG00000037411.10	ENSMUSG00000037411.10	Serpine1	-0.295619	0.00115	0.0464069	yes	0.814723	-1.80881	chr5:137061503-137072268	q1	q2	OK	251.637	205.014
ENSMUSG00000021822.3	ENSMUSG00000021822.3	Plau	-0.301801	0.00115	0.0464069	yes	0.811239	-1.86842	chr14:20836659-20843385	q1	q2	OK	52.0156	42.1971
ENSMUSG00000039953.13	ENSMUSG00000039953.13	Clstn1	-0.316451	0.00045	0.024937	yes	0.803043	-1.96395	chr4:149586467-149648899	q1	q2	OK	36.1801	29.0542
ENSMUSG00000032380.9	ENSMUSG00000032380.9	Dapk2	-0.318198	0.001	0.0425351	yes	0.802071	-1.84006	chr9:66158222-66272242	q1	q2	OK	27.833	22.324
ENSMUSG00000041571.9	ENSMUSG00000041571.9	Selenow	-0.320734	0.0011	0.0450828	yes	0.800662	-1.86896	chr7:15917207-15922402	q1	q2	OK	76.4269	61.1921
ENSMUSG00000021468.8	ENSMUSG00000021468.8	Sptlc1	-0.326325	0.00075	0.0350252	yes	0.797566	-1.93688	chr13:53332747-53377397	q1	q2	OK	21.317	17.0017
ENSMUSG00000017721.15	ENSMUSG00000017721.15	Pigt	-0.328281	0.0006	0.0301687	yes	0.796485	-1.96314	chr2:164497519-164508301	q1	q2	OK	36.9834	29.4567
ENSMUSG00000031432.3	ENSMUSG00000031432.3	Prps1	-0.331093	0.0003	0.0181592	yes	0.794934	-2.03714	chrX:140456612-140476140	q1	q2	OK	75.0914	59.6927
ENSMUSG00000020009.13	ENSMUSG00000020009.13	Ifngr1	-0.334285	0.0008	0.0367067	yes	0.793177	-1.80705	chr10:19591948-19610229	q1	q2	OK	19.4473	15.4252
ENSMUSG00000022565.15	ENSMUSG00000022565.15	Plec	-0.335932	0.00025	0.0158649	yes	0.792272	-1.99026	chr15:76170973-76243441	q1	q2	OK	84.7836	67.1716
ENSMUSG00000078521.2	ENSMUSG00000078521.2	Aunip	-0.336782	0.001	0.0425351	yes	0.791806	-1.80544	chr4:134510998-134523927	q1	q2	OK	19.9714	15.8135
ENSMUSG00000027195.10	ENSMUSG00000027195.10	Hsd17b12	-0.340002	0.0003	0.0181592	yes	0.79004	-2.11297	chr2:94032688-94157964	q1	q2	OK	71.0931	56.1664
ENSMUSG00000038264.8	ENSMUSG00000038264.8	Sema7a	-0.358328	0.00015	0.0107305	yes	0.780068	-1.95001	chr9:57940111-57962865	q1	q2	OK	65.9931	51.4791
ENSMUSG00000041936.18	ENSMUSG00000041936.18	Agrn	-0.361265	0.0011	0.0450828	yes	0.778482	-1.75332	chr4:156165289-156197488	q1	q2	OK	14.3901	11.2024
ENSMUSG00000057497.8	ENSMUSG00000057497.8	Fam136a	-0.363265	0.0001	0.00771471	yes	0.777403	-2.11126	chr6:86365645-86370058	q1	q2	OK	42.9187	33.3651
ENSMUSG00000064339.1	ENSMUSG00000064339.1	mt-Rnr2	-0.364049	5e-05	0.00437167	yes	0.776981	-2.2953	chrM:1093-2675	q1	q2	OK	343.037	266.533
ENSMUSG00000064341.1	ENSMUSG00000064341.1	mt-Nd1	-0.36554	0.00065	0.0316709	yes	0.776178	-2.00013	chrM:2750-3842	q1	q2	OK	4134.59	3209.18
ENSMUSG00000037434.7	ENSMUSG00000037434.7	Slc30a1	-0.366203	0.00085	0.0382209	yes	0.775822	-1.85557	chr1:191886129-191913247	q1	q2	OK	3.31366	2.57081
ENSMUSG00000008348.9	ENSMUSG00000008348.9	Ubc	-0.372528	5e-05	0.00437167	yes	0.772428	-2.31409	chr5:125385964-125390555	q1	q2	OK	52.2678	40.3731
ENSMUSG00000046324.12	ENSMUSG00000046324.12	Ermp1	-0.373976	0.0009	0.0397871	yes	0.771653	-1.81891	chr19:29608213-29648415	q1	q2	OK	10.199	7.87009
ENSMUSG00000022474.15	ENSMUSG00000022474.15	Pmm1	-0.37757	0.0001	0.00771471	yes	0.769733	-2.07618	chr15:81951107-81960930	q1	q2	OK	38.247	29.44
ENSMUSG00000021760.5	ENSMUSG00000021760.5	Gpx8	-0.380242	0.0001	0.00771471	yes	0.768309	-2.30486	chr13:113035110-113091195	q1	q2	OK	109.854	84.4015
ENSMUSG00000009549.14	ENSMUSG00000009549.14	Srp14	-0.381209	0.0001	0.00771471	yes	0.767794	-2.25958	chr2:118475849-118479711	q1	q2	OK	86.9909	66.7911
ENSMUSG00000031176.8	ENSMUSG00000031176.8	Dynlt3	-0.383817	5e-05	0.00437167	yes	0.766407	-2.14587	chrX:9654266-9663003	q1	q2	OK	25.0485	19.1973
ENSMUSG00000097195.10	ENSMUSG00000097195.10	Snhg5	-0.384631	0.00015	0.0107305	yes	0.765975	-2.25347	chr9:88495267-88523562	q1	q2	OK	121.057	92.7266
ENSMUSG00000037855.15	ENSMUSG00000037855.15	Zfp365	-0.385705	0.00035	0.0203258	yes	0.765405	-2.08232	chr10:67886102-67912662	q1	q2	OK	8.43581	6.45681
ENSMUSG00000038168.5	ENSMUSG00000038168.5	P3h2	-0.38756	0.00095	0.0411876	yes	0.764421	-1.86903	chr16:25956474-26105784	q1	q2	OK	5.65909	4.32593
ENSMUSG00000021843.17	ENSMUSG00000021843.17	Ktn1	-0.40022	0.0001	0.00771471	yes	0.757743	-1.74187	chr14:47648447-47739894	q1	q2	OK	37.3585	28.3081
ENSMUSG00000054793.8	ENSMUSG00000054793.8	Cadm4	-0.400429	0.00105	0.0439492	yes	0.757633	-1.8039	chr7:24482022-24504539	q1	q2	OK	5.43317	4.11635
ENSMUSG00000005413.8	ENSMUSG00000005413.8	Hmox1	-0.40496	5e-05	0.00437167	yes	0.755257	-2.4893	chr8:75093620-75100589	q1	q2	OK	571.351	431.517
ENSMUSG00000039476.13	ENSMUSG00000039476.13	Prrx2	-0.431063	0.00055	0.0286619	yes	0.741715	-1.97335	chr2:30834971-30881251	q1	q2	OK	22.6308	16.7856
ENSMUSG00000106106.3	ENSMUSG00000106106.3	CT010467.1	-0.433207	5e-05	0.00437167	yes	0.740614	-2.45152	chr17:39846352-39848827	q1	q2	OK	1002.45	742.426
ENSMUSG00000011256.16	ENSMUSG00000011256.16	Adam19	-0.440685	5e-05	0.00437167	yes	0.736785	-2.46844	chr11:46055991-46147343	q1	q2	OK	24.4566	18.0193
ENSMUSG00000032570.17	ENSMUSG00000032570.17	Atp2c1	-0.442686	0.00085	0.0382209	yes	0.735763	-1.797	chr9:105162155-105527319	q1	q2	OK	48.4487	35.6468
ENSMUSG00000039376.13	ENSMUSG00000039376.13	Synpo2l	-0.444603	5e-05	0.00437167	yes	0.734786	-2.46346	chr14:20658945-20668354	q1	q2	OK	9.33659	6.8604
ENSMUSG00000006418.17	ENSMUSG00000006418.17	Rnf114	-0.445261	0.00055	0.0286619	yes	0.734451	-1.99037	chr2:167481132-167516173	q1	q2	OK	23.3677	17.1625
ENSMUSG00000030110.13	ENSMUSG00000030110.13	Ret	-0.445608	5e-05	0.00437167	yes	0.734275	-2.5231	chr6:118151744-118197718	q1	q2	OK	7.3436	5.39222
ENSMUSG00000023923.10	ENSMUSG00000023923.10	Tbc1d5	-0.446481	5e-05	0.00437167	yes	0.733831	-2.55147	chr17:50733123-51179352	q1	q2	OK	9.14526	6.71107
ENSMUSG00000061436.15	ENSMUSG00000061436.15	Hipk2	-0.446511	0.00035	0.0203258	yes	0.733815	-2.03086	chr6:38694389-39084585	q1	q2	OK	6.22381	4.56713
ENSMUSG00000037933.16	ENSMUSG00000037933.16	Bicd2	-0.44964	5e-05	0.00437167	yes	0.732226	-2.65213	chr13:49341584-49387026	q1	q2	OK	20.6325	15.1077
ENSMUSG00000032860.5	ENSMUSG00000032860.5	P2ry2	-0.45142	0.00065	0.0316709	yes	0.731323	-2.01774	chr7:100996567-101012866	q1	q2	OK	4.74182	3.4678
ENSMUSG00000117123.1	ENSMUSG00000117123.1	Gm49890	-0.458916	0.00055	0.0286619	yes	0.727533	-1.95812	chr4:88909854-88938521	q1	q2	OK	8.402	6.11273
ENSMUSG00000028583.14	ENSMUSG00000028583.14	Pdpn	-0.463618	5e-05	0.00437167	yes	0.725165	-2.6969	chr4:143267430-143299564	q1	q2	OK	140.719	102.045
ENSMUSG00000020859.16	ENSMUSG00000020859.16	Spag9	-0.467157	5e-05	0.00437167	yes	0.723389	-2.61343	chr11:93996090-94126085	q1	q2	OK	24.1359	17.4597
ENSMUSG00000063696.7	ENSMUSG00000063696.7	Gm8730	-0.470005	0.00065	0.0316709	yes	0.721962	-2.0388	chr8:102864844-102865798	q1	q2	OK	12.073	8.71625
ENSMUSG00000040466.16	ENSMUSG00000040466.16	Blvrb	-0.475973	5e-05	0.00437167	yes	0.718982	-2.69469	chr7:27447977-27466144	q1	q2	OK	46.387	33.3514
ENSMUSG00000027220.2	ENSMUSG00000027220.2	Syt13	-0.477215	5e-05	0.00437167	yes	0.718363	-2.71757	chr2:92915097-92956058	q1	q2	OK	9.54935	6.8599
ENSMUSG00000023953.9	ENSMUSG00000023953.9	Polh	-0.485609	5e-05	0.00437167	yes	0.714196	-2.70618	chr17:46171354-46202645	q1	q2	OK	12.5495	8.96277
ENSMUSG00000027641.13	ENSMUSG00000027641.13	Rbl1	-0.48617	5e-05	0.00437167	yes	0.713918	-2.70749	chr2:157145892-157204534	q1	q2	OK	18.3244	13.0821
ENSMUSG00000022103.10	ENSMUSG00000022103.10	Gfra2	-0.492054	0.0001	0.00771471	yes	0.711012	-2.25596	chr14:70890119-70979838	q1	q2	OK	6.14226	4.36722
ENSMUSG00000001864.13	ENSMUSG00000001864.13	Aif1l	-0.49738	0.001	0.0425351	yes	0.708392	-1.68035	chr2:31950138-31973442	q1	q2	OK	48.3698	34.2648
ENSMUSG00000044700.15	ENSMUSG00000044700.15	Tmem201	-0.509152	5e-05	0.00437167	yes	0.702635	-2.998	chr4:149715374-149738044	q1	q2	OK	22.8231	16.0363
ENSMUSG00000028599.10	ENSMUSG00000028599.10	Tnfrsf1b	-0.514726	0.00025	0.0158649	yes	0.699926	-2.43273	chr4:145213462-145246870	q1	q2	OK	10.7917	7.5534
ENSMUSG00000025790.14	ENSMUSG00000025790.14	Slco3a1	-0.530172	0.0001	0.00771471	yes	0.692472	-2.16448	chr7:74275418-74554780	q1	q2	OK	4.6283	3.20497
ENSMUSG00000117875.1	ENSMUSG00000117875.1	Gm6789	-0.540683	5e-05	0.00437167	yes	0.687445	-2.35841	chr18:63543750-63545135	q1	q2	OK	7.79742	5.3603
ENSMUSG00000032548.14	ENSMUSG00000032548.14	Slco2a1	-0.550781	0.001	0.0425351	yes	0.68265	-1.88806	chr9:102988711-103096002	q1	q2	OK	0.809032	0.552286
ENSMUSG00000116048.1	ENSMUSG00000116048.1	Septin2	-0.552249	5e-05	0.00437167	yes	0.681956	-3.08255	chr1:93478963-93510260	q1	q2	OK	97.1746	66.2688
ENSMUSG00000029022.18	ENSMUSG00000029022.18	Miip	-0.554067	0.0001	0.00771471	yes	0.681097	-2.47953	chr4:147860777-147868816	q1	q2	OK	22.5828	15.3811
ENSMUSG00000021190.14	ENSMUSG00000021190.14	Lgmn	-0.561375	5e-05	0.00437167	yes	0.677656	-3.11923	chr12:102394083-102439813	q1	q2	OK	17.7223	12.0096
ENSMUSG00000020303.2	ENSMUSG00000020303.2	Stc2	-0.562704	5e-05	0.00437167	yes	0.677032	-2.51922	chr11:31357306-31370074	q1	q2	OK	5.00432	3.38809
ENSMUSG00000028655.11	ENSMUSG00000028655.11	Mfsd2a	-0.562826	5e-05	0.00437167	yes	0.676975	-2.51874	chr4:122946849-122961188	q1	q2	OK	18.8954	12.7917
ENSMUSG00000051359.15	ENSMUSG00000051359.15	Ncald	-0.574849	0.001	0.0425351	yes	0.671357	-1.80101	chr15:37366174-37792570	q1	q2	OK	1.86019	1.24885
ENSMUSG00000027962.14	ENSMUSG00000027962.14	Vcam1	-0.577725	5e-05	0.00437167	yes	0.67002	-3.05938	chr3:116109948-116141016	q1	q2	OK	67.0541	44.9275
ENSMUSG00000009894.15	ENSMUSG00000009894.15	Snap47	-0.590836	5e-05	0.00437167	yes	0.663958	-2.3964	chr11:59407133-59458567	q1	q2	OK	25.6571	17.0352
ENSMUSG00000118220.1	ENSMUSG00000118220.1	Gm6192	-0.591435	5e-05	0.00437167	yes	0.663682	-2.86523	chr19:7864387-7966027	q1	q2	OK	13.6831	9.08122
ENSMUSG00000064354.1	ENSMUSG00000064354.1	mt-Co2	-0.591822	0.0001	0.00771471	yes	0.663504	-2.36989	chrM:7012-7696	q1	q2	OK	13.6854	9.08033
ENSMUSG00000017417.14	ENSMUSG00000017417.14	Plxdc1	-0.600281	0.00075	0.0350252	yes	0.659625	-1.90923	chr11:97923237-97986444	q1	q2	OK	1.27002	0.83774
ENSMUSG00000017737.2	ENSMUSG00000017737.2	Mmp9	-0.601319	5e-05	0.00437167	yes	0.659151	-2.06465	chr2:164940779-164955850	q1	q2	OK	2.02773	1.33658
ENSMUSG00000032744.4	ENSMUSG00000032744.4	Heyl	-0.606796	0.00015	0.0107305	yes	0.656653	-1.92837	chr4:123233555-123249875	q1	q2	OK	2.41675	1.58697
ENSMUSG00000101111.1	ENSMUSG00000101111.1	Gm28437	-0.608194	0.00035	0.0203258	yes	0.656017	-2.06173	chr1:24613188-24613971	q1	q2	OK	6.07622	3.98611
ENSMUSG00000082575.1	ENSMUSG00000082575.1	Eef2-ps2	-0.609678	0.0007	0.0332828	yes	0.655343	-2.02903	chr4:143242023-143243368	q1	q2	OK	2.93163	1.92122
ENSMUSG00000101795.2	ENSMUSG00000101795.2	Gm5835	-0.614713	5e-05	0.00437167	yes	0.65306	-2.45969	chr1:143093346-143094616	q1	q2	OK	6.22189	4.06327
ENSMUSG00000033752.7	ENSMUSG00000033752.7	Mnd1	-0.6185	0.0001	0.00771471	yes	0.651348	-2.42714	chr3:84087932-84155786	q1	q2	OK	8.51976	5.54933
ENSMUSG00000030091.17	ENSMUSG00000030091.17	Nup210	-0.62714	0.0007	0.0332828	yes	0.647459	-2.02287	chr6:91013067-91116829	q1	q2	OK	7.71226	4.99337
ENSMUSG00000010064.15	ENSMUSG00000010064.15	Slc38a3	-0.627924	5e-05	0.00437167	yes	0.647107	-2.25949	chr9:107650633-107669530	q1	q2	OK	3.21442	2.08008
ENSMUSG00000031684.11	ENSMUSG00000031684.11	Slc10a7	-0.629955	5e-05	0.00437167	yes	0.646197	-3.81905	chr8:78509345-78734003	q1	q2	OK	20.1358	13.0117
ENSMUSG00000083619.3	ENSMUSG00000083619.3	Gm14414	-0.642534	5e-05	0.00437167	yes	0.640587	-2.48573	chr2:177460274-177460847	q1	q2	OK	17.4698	11.1909
ENSMUSG00000095041.7	ENSMUSG00000095041.7	AC149090.1	-0.645247	5e-05	0.00437167	yes	0.639383	-3.35272	JH584304.1:52189-59690	q1	q2	OK	37.7023	24.1063
ENSMUSG00000118345.1	ENSMUSG00000118345.1	Gm7105	-0.650554	5e-05	0.00437167	yes	0.637036	-2.95753	chr19:8251967-8317179	q1	q2	OK	10.5377	6.7129
ENSMUSG00000082901.1	ENSMUSG00000082901.1	Rps8-ps5	-0.6574	5e-05	0.00437167	yes	0.63402	-2.56251	chr2:177892637-177893264	q1	q2	OK	15.8881	10.0734
ENSMUSG00000029669.14	ENSMUSG00000029669.14	Tspan12	-0.65759	5e-05	0.00437167	yes	0.633936	-2.8532	chr6:21771394-21858178	q1	q2	OK	27.7191	17.5721
ENSMUSG00000100798.1	ENSMUSG00000100798.1	Gm19589	-0.661838	0.00095	0.0411876	yes	0.632073	-1.88893	chr1:88551516-88562167	q1	q2	OK	0.816887	0.516332
ENSMUSG00000033581.17	ENSMUSG00000033581.17	Igf2bp2	-0.665771	5e-05	0.00437167	yes	0.630352	-2.20894	chr16:22059008-22163299	q1	q2	OK	2.74846	1.7325
ENSMUSG00000058914.12	ENSMUSG00000058914.12	C1qtnf3	-0.676873	5e-05	0.00437167	yes	0.62552	-4.07845	chr15:10952331-10980150	q1	q2	OK	48.9187	30.5996
ENSMUSG00000000296.8	ENSMUSG00000000296.8	Tpd52l1	-0.681491	0.0003	0.0181592	yes	0.623521	-2.17447	chr10:31332375-31445958	q1	q2	OK	3.58315	2.23417
ENSMUSG00000038296.14	ENSMUSG00000038296.14	Galnt18	-0.682942	5e-05	0.00437167	yes	0.622894	-2.93543	chr7:111471660-111779977	q1	q2	OK	3.53179	2.19993
ENSMUSG00000094344.1	ENSMUSG00000094344.1	Gm11942	-0.686309	0.00065	0.0316709	yes	0.621442	-1.96367	chr4:32964887-32965232	q1	q2	OK	17.7307	11.0186
ENSMUSG00000033967.4	ENSMUSG00000033967.4	Rnf225	-0.698226	5e-05	0.00437167	yes	0.61633	-2.4617	chr7:12927415-12931072	q1	q2	OK	1.2952	0.798273
ENSMUSG00000039323.18	ENSMUSG00000039323.18	Igfbp2	-0.701741	5e-05	0.00437167	yes	0.61483	-2.63208	chr1:72824502-72852474	q1	q2	OK	4.91547	3.02218
ENSMUSG00000056671.7	ENSMUSG00000056671.7	Prelid2	-0.703058	0.0009	0.0397871	yes	0.614269	-1.89406	chr18:41875599-41951242	q1	q2	OK	2.75211	1.69053
ENSMUSG00000104913.1	ENSMUSG00000104913.1	Gm6560	-0.706591	5e-05	0.00437167	yes	0.612766	-2.72924	chr5:22550431-23275597	q1	q2	OK	6.45667	3.95643
ENSMUSG00000025348.9	ENSMUSG00000025348.9	Itga7	-0.706736	5e-05	0.00437167	yes	0.612705	-3.68929	chr10:128933817-128960988	q1	q2	OK	237.425	145.471
ENSMUSG00000060548.13	ENSMUSG00000060548.13	Tnfrsf19	-0.706976	0.0002	0.0132252	yes	0.612603	-2.32559	chr14:60963874-61076802	q1	q2	OK	1.34128	0.821672
ENSMUSG00000028348.7	ENSMUSG00000028348.7	Cavin4	-0.70943	5e-05	0.00437167	yes	0.611562	-3.32753	chr4:48663513-48673502	q1	q2	OK	6.68516	4.08839
ENSMUSG00000020312.12	ENSMUSG00000020312.12	Shc2	-0.716165	0.00035	0.0203258	yes	0.608713	-2.03628	chr10:79618050-79639520	q1	q2	OK	1.12262	0.683352
ENSMUSG00000028175.15	ENSMUSG00000028175.15	Depdc1a	-0.726685	5e-05	0.00437167	yes	0.604291	-3.75341	chr3:159495432-159529955	q1	q2	OK	9.1228	5.51282
ENSMUSG00000042834.15	ENSMUSG00000042834.15	Nrep	-0.731278	5e-05	0.00437167	yes	0.60237	-3.12853	chr18:33437018-33464029	q1	q2	OK	5.79443	3.4904
ENSMUSG00000059252.5	ENSMUSG00000059252.5	Tpt1-ps5	-0.752703	0.0006	0.0301687	yes	0.593491	-2.03032	chr9:37696514-37697030	q1	q2	OK	6.30384	3.74127
ENSMUSG00000023092.16	ENSMUSG00000023092.16	Fhl1	-0.761024	5e-05	0.00437167	yes	0.590077	-3.64502	chrX:56731786-56793346	q1	q2	OK	28.6735	16.9196
ENSMUSG00000050777.7	ENSMUSG00000050777.7	Tmem37	-0.776342	5e-05	0.00437167	yes	0.583845	-3.56707	chr1:120067376-120074074	q1	q2	OK	10.319	6.02472
ENSMUSG00000038418.7	ENSMUSG00000038418.7	Egr1	-0.780269	5e-05	0.00437167	yes	0.582258	-4.74925	chr18:34859822-34864984	q1	q2	OK	41.2239	24.003
ENSMUSG00000067106.6	ENSMUSG00000067106.6	Gm5529	-0.786555	0.0007	0.0332828	yes	0.579727	-1.97819	chr1:79922535-79923426	q1	q2	OK	2.23128	1.29353
ENSMUSG00000026418.16	ENSMUSG00000026418.16	Tnni1	-0.789764	5e-05	0.00437167	yes	0.578439	-2.97934	chr1:135779433-135810989	q1	q2	OK	7.60734	4.40038
ENSMUSG00000044350.14	ENSMUSG00000044350.14	Lacc1	-0.794478	5e-05	0.00437167	yes	0.576552	-2.69259	chr14:77024199-77112257	q1	q2	OK	2.90767	1.67642
ENSMUSG00000002289.16	ENSMUSG00000002289.16	Angptl4	-0.79568	5e-05	0.00437167	yes	0.576072	-4.38783	chr17:33773749-33781830	q1	q2	OK	31.6397	18.2267
ENSMUSG00000032827.15	ENSMUSG00000032827.15	Ppp1r9a	-0.814492	5e-05	0.00437167	yes	0.568609	-2.34539	chr6:4902916-5165661	q1	q2	OK	1.48286	0.843167
ENSMUSG00000114737.1	ENSMUSG00000114737.1	Gm8483	-0.818867	0.00045	0.024937	yes	0.566887	-2.15856	chr14:14447660-14448944	q1	q2	OK	1.59986	0.906941
ENSMUSG00000084350.1	ENSMUSG00000084350.1	Znf41-ps	-0.827572	0.00095	0.0411876	yes	0.563477	-1.96613	chr4:145825236-145829942	q1	q2	OK	0.546588	0.307989
ENSMUSG00000100033.1	ENSMUSG00000100033.1	Gm8337	-0.850708	0.00045	0.024937	yes	0.554513	-2.07681	chr1:47657692-47659630	q1	q2	OK	0.778492	0.431684
ENSMUSG00000032826.19	ENSMUSG00000032826.19	Ank2	-0.854632	5e-05	0.00437167	yes	0.553006	-2.53377	chr3:126921611-127499350	q1	q2	OK	6.90732	3.81979
ENSMUSG00000090290.2	ENSMUSG00000090290.2	Tarbp1	-0.862395	5e-05	0.00437167	yes	0.550039	-4.42938	chr8:126422514-126475065	q1	q2	OK	7.24248	3.98364
ENSMUSG00000101262.1	ENSMUSG00000101262.1	Gm8326	-0.875217	0.0001	0.00771471	yes	0.545172	-2.3053	chr1:46414501-46416932	q1	q2	OK	1.01098	0.551157
ENSMUSG00000082424.4	ENSMUSG00000082424.4	Gm13292	-0.886496	0.0005	0.0266746	yes	0.540926	-2.12308	chr2:11409030-11410030	q1	q2	OK	1.71387	0.927079
ENSMUSG00000030560.17	ENSMUSG00000030560.17	Ctsc	-0.890126	0.0001	0.00771471	yes	0.539567	-2.15214	chr7:88278084-88310888	q1	q2	OK	1.21057	0.653182
ENSMUSG00000050751.14	ENSMUSG00000050751.14	Pgbd5	-0.89075	0.00055	0.0286619	yes	0.539334	-1.76989	chr8:124369048-124439658	q1	q2	OK	0.85686	0.462134
ENSMUSG00000083563.1	ENSMUSG00000083563.1	Gm13340	-0.892556	5e-05	0.00437167	yes	0.538659	-2.52699	chr2:22227502-22618252	q1	q2	OK	7.25572	3.90836
ENSMUSG00000033174.17	ENSMUSG00000033174.17	Mgll	-0.900849	0.0005	0.0266746	yes	0.535571	-1.6997	chr6:88716421-88828360	q1	q2	OK	1.04601	0.560212
ENSMUSG00000060550.16	ENSMUSG00000060550.16	H2-Q7	-0.925347	0.00015	0.0107305	yes	0.526554	-2.22174	chr17:35439154-35443773	q1	q2	OK	1.53826	0.809978
ENSMUSG00000056328.14	ENSMUSG00000056328.14	Myh1	-0.93908	5e-05	0.00437167	yes	0.521565	-2.77516	chr11:67200051-67237573	q1	q2	OK	1.02331	0.533723
ENSMUSG00000108873.1	ENSMUSG00000108873.1	Gm44609	-0.946468	5e-05	0.00437167	yes	0.518901	-2.31484	chr7:66839734-67153171	q1	q2	OK	8.24122	4.27638
ENSMUSG00000100862.1	ENSMUSG00000100862.1	Gm10925	-0.9583	5e-05	0.00437167	yes	0.514663	-3.08347	chr1:24613973-24614651	q1	q2	OK	7.58707	3.90478
ENSMUSG00000027287.14	ENSMUSG00000027287.14	Snap23	-0.958379	5e-05	0.00437167	yes	0.514635	-2.79195	chr2:120567670-120601255	q1	q2	OK	12.675	6.52297
ENSMUSG00000028194.15	ENSMUSG00000028194.15	Ddah1	-0.960969	5e-05	0.00437167	yes	0.513712	-4.6137	chr3:145758674-145894277	q1	q2	OK	9.10869	4.67924
ENSMUSG00000082064.3	ENSMUSG00000082064.3	Rpl5-ps2	-0.961945	0.0003	0.0181592	yes	0.513364	-2.22418	chr2:154703808-154704699	q1	q2	OK	1.86858	0.959261
ENSMUSG00000060284.7	ENSMUSG00000060284.7	Sp7	-0.962126	5e-05	0.00437167	yes	0.5133	-5.0952	chr15:102356605-102367182	q1	q2	OK	6.07703	3.11934
ENSMUSG00000023460.13	ENSMUSG00000023460.13	Rab12	-0.986756	5e-05	0.00437167	yes	0.504611	-4.07831	chr17:66494511-66519729	q1	q2	OK	30.3452	15.3126
ENSMUSG00000005360.14	ENSMUSG00000005360.14	Slc1a3	-1.03198	0.0006	0.0301687	yes	0.489039	-1.74148	chr15:8634123-8710764	q1	q2	OK	0.964653	0.471754
ENSMUSG00000026062.12	ENSMUSG00000026062.12	Slc9a2	-1.05705	5e-05	0.00437167	yes	0.480614	-3.46438	chr1:40680573-40769273	q1	q2	OK	0.852685	0.409813
ENSMUSG00000087377.1	ENSMUSG00000087377.1	AV099323	-1.11259	0.00105	0.0439492	yes	0.462463	-2.01757	chr2:132253356-132261333	q1	q2	OK	0.828377	0.383093
ENSMUSG00000100131.1	ENSMUSG00000100131.1	Gm28439	-1.14093	0.00015	0.0107305	yes	0.453467	-2.45379	chr1:24611534-24612700	q1	q2	OK	2.06241	0.935236
ENSMUSG00000032500.10	ENSMUSG00000032500.10	Dclk3	-1.14809	5e-05	0.00437167	yes	0.451222	-2.89784	chr9:111439080-111489118	q1	q2	OK	0.590486	0.26644
ENSMUSG00000017002.14	ENSMUSG00000017002.14	Slpi	-1.16352	0.00065	0.0316709	yes	0.446422	-2.23206	chr2:164354069-164389095	q1	q2	OK	1.63373	0.729334
ENSMUSG00000052374.16	ENSMUSG00000052374.16	Actn2	-1.17841	0.0002	0.0132252	yes	0.441838	-1.81117	chr13:12269425-12340760	q1	q2	OK	0.744228	0.328828
ENSMUSG00000068614.7	ENSMUSG00000068614.7	Actc1	-1.18319	5e-05	0.00437167	yes	0.440377	-4.74074	chr2:114009600-114068324	q1	q2	OK	7.80864	3.43876
ENSMUSG00000042367.12	ENSMUSG00000042367.12	Gjb3	-1.18917	5e-05	0.00437167	yes	0.438555	-6.58767	chr4:127325234-127330844	q1	q2	OK	26.5368	11.6379
ENSMUSG00000042379.8	ENSMUSG00000042379.8	Esm1	-1.19462	5e-05	0.00437167	yes	0.436902	-5.7622	chr13:113171607-113225908	q1	q2	OK	9.26407	4.04748
ENSMUSG00000006542.13	ENSMUSG00000006542.13	Prkag3	-1.20575	0.0007	0.0332828	yes	0.433544	-1.68462	chr1:74738921-74749221	q1	q2	OK	0.386247	0.167455
ENSMUSG00000080877.1	ENSMUSG00000080877.1	Rpl22-ps1	-1.21786	5e-05	0.00437167	yes	0.42992	-2.40164	chrX:8038610-8038996	q1	q2	OK	5.27933	2.2697
ENSMUSG00000067916.9	ENSMUSG00000067916.9	Zfp991	-1.24153	5e-05	0.00437167	yes	0.422924	-2.4624	chr4:147132037-147180579	q1	q2	OK	0.827375	0.349915
ENSMUSG00000096449.2	ENSMUSG00000096449.2	Gm4076	-1.24675	0.0002	0.0132252	yes	0.421396	-2.44616	chr13:85126549-85127514	q1	q2	OK	1.12702	0.47492
ENSMUSG00000028923.14	ENSMUSG00000028923.14	Necap2	-1.25351	5e-05	0.00437167	yes	0.419427	-5.1608	chr4:141066511-141078357	q1	q2	OK	27.9856	11.7379
ENSMUSG00000056771.7	ENSMUSG00000056771.7	Gm10010	-1.26935	0.0008	0.0367067	yes	0.414847	-2.18399	chr6:128185276-128200623	q1	q2	OK	0.258111	0.107076
ENSMUSG00000095600.2	ENSMUSG00000095600.2	Gm9457	-1.286	0.0006	0.0301687	yes	0.410086	-2.18002	chr8:4812816-4813434	q1	q2	OK	3.76872	1.5455
ENSMUSG00000042510.7	ENSMUSG00000042510.7	AA986860	-1.32292	0.00015	0.0107305	yes	0.399725	-2.24189	chr1:130731975-130744622	q1	q2	OK	0.669703	0.267697
ENSMUSG00000083863.1	ENSMUSG00000083863.1	Gm13341	-1.35233	5e-05	0.00437167	yes	0.391659	-3.33107	chr2:22227502-22618252	q1	q2	OK	19.4087	7.6016
ENSMUSG00000030672.12	ENSMUSG00000030672.12	Mylpf	-1.37071	5e-05	0.00437167	yes	0.386701	-4.44106	chr7:127208889-127214298	q1	q2	OK	15.2638	5.90253
ENSMUSG00000006221.7	ENSMUSG00000006221.7	Hspb7	-1.37861	5e-05	0.00437167	yes	0.384589	-3.20633	chr4:141420778-141425311	q1	q2	OK	0.557047	0.214235
ENSMUSG00000081593.1	ENSMUSG00000081593.1	Gm11841	-1.40777	0.0007	0.0332828	yes	0.376894	-2.2105	chr4:12125289-12127252	q1	q2	OK	0.266257	0.100351
ENSMUSG00000061086.12	ENSMUSG00000061086.12	Myl4	-1.41538	5e-05	0.00437167	yes	0.374911	-4.08393	chr11:104550662-104595753	q1	q2	OK	5.92983	2.22316
ENSMUSG00000024905.15	ENSMUSG00000024905.15	Tesmin	-1.44725	0.0011	0.0450828	yes	0.36672	-1.88592	chr19:3388856-3407823	q1	q2	OK	0.236807	0.0868417
ENSMUSG00000044086.8	ENSMUSG00000044086.8	Lmod3	-1.4725	5e-05	0.00437167	yes	0.360357	-3.16355	chr6:97238533-97252759	q1	q2	OK	0.61033	0.219937
ENSMUSG00000030255.13	ENSMUSG00000030255.13	Sspn	-1.49246	5e-05	0.00437167	yes	0.355406	-7.66882	chr6:145931640-145965223	q1	q2	OK	6.68909	2.37735
ENSMUSG00000078495.10	ENSMUSG00000078495.10	Zfp984	-1.59395	5e-05	0.00437167	yes	0.331263	-5.17649	chr4:147753973-147809840	q1	q2	OK	2.60611	0.863308
ENSMUSG00000079588.3	ENSMUSG00000079588.3	Tmem182	-1.5987	5e-05	0.00437167	yes	0.330174	-4.16205	chr1:40805600-40856887	q1	q2	OK	0.907445	0.299615
ENSMUSG00000086743.2	ENSMUSG00000086743.2	Hnrnpa1l2-ps	-1.63788	0.00035	0.0203258	yes	0.321328	-2.37114	chr13:74864304-74865356	q1	q2	OK	0.596196	0.191574
ENSMUSG00000019718.8	ENSMUSG00000019718.8	L3hypdh	-1.66472	5e-05	0.00437167	yes	0.315406	-5.30845	chr12:72073427-72085439	q1	q2	OK	5.94013	1.87355
ENSMUSG00000042828.12	ENSMUSG00000042828.12	Trim72	-1.7888	5e-05	0.00437167	yes	0.289413	-3.84623	chr7:128001898-128011033	q1	q2	OK	0.845779	0.244779
ENSMUSG00000020908.14	ENSMUSG00000020908.14	Myh3	-2.00009	5e-05	0.00437167	yes	0.249984	-7.96203	chr11:67078299-67102291	q1	q2	OK	2.26201	0.565468
ENSMUSG00000031461.4	ENSMUSG00000031461.4	Myom2	-2.31677	0.0001	0.00771471	yes	0.200716	-1.30461	chr8:15057652-15133541	q1	q2	OK	0.308962	0.0620139
ENSMUSG00000083219.1	ENSMUSG00000083219.1	Gm11410	-2.69641	0.00055	0.0286619	yes	0.154276	-2.98116	chr4:80003988-80005131	q1	q2	OK	0.480279	0.0740955
ENSMUSG00000032549.7	ENSMUSG00000032549.7	Rab6b	-2.916	5e-05	0.00437167	yes	0.132494	-7.48491	chr9:103111786-103185276	q1	q2	OK	1.62849	0.215766
ENSMUSG00000027861.13	ENSMUSG00000027861.13	Casq2	-2.91671	5e-05	0.00437167	yes	0.132429	-2.26113	chr3:102086414-102146514	q1	q2	OK	0.893126	0.118275
ENSMUSG00000061816.15	ENSMUSG00000061816.15	Myl1	-2.92763	5e-05	0.00437167	yes	0.13143	-5.43702	chr1:66924294-66945404	q1	q2	OK	4.75406	0.624827
ENSMUSG00000097339.5	ENSMUSG00000097339.5	Gm26671	-3.22577	0.0007	0.0332828	yes	0.106892	-1.89758	chr3:57612696-57625824	q1	q2	OK	0.864679	0.0924278
ENSMUSG00000042451.12	ENSMUSG00000042451.12	Mybph	-3.27418	5e-05	0.00437167	yes	0.103365	-6.20525	chr1:134193447-134235431	q1	q2	OK	2.0513	0.212032
ENSMUSG00000002732.14	ENSMUSG00000002732.14	Fkbp7	-3.51983	5e-05	0.00437167	yes	0.0871818	-9.67129	chr2:76663043-76673116	q1	q2	OK	15.7069	1.36936
