# Supplementary material for: Muscle stem cell polarity requires QKI-mediated alternative splicing of Integrin Alpha-7 (Itga7)
Source: Life Sci Alliance. 2022 Feb 14;5(5):e202101192. doi: 10.26508/lsa.202101192 (PMC8860092; doi:10.26508/lsa.202101192)
Supplement: Supplementary file 2 [file LSA-2021-01192_TableS2.xlsx]

## Sheet: SE
geneSymbol	chr	QRE in intron(y/n)	within 200 nt(y/n)	strand	exonStart_0base	exonEnd	upstreamES	upstreamEE	downstreamES	downstreamEE	ID	IJC_SAMPLE_1	SJC_SAMPLE_1	IJC_SAMPLE_2	SJC_SAMPLE_2	IncFormLen	SkipFormLen	PValue	FDR	IncLevel1	IncLevel2	IncLevelDifference
Map4k4	chr1	y	y	+	40001429	40001591	40000530	40000749	40003756	40003987	15046	222154208	608457578	196816221941	167123157	262	100	0	0	0.122,0.114,0.121	0.818,0.834,0.825	-0.707
Map4k4	chr1	y	y	+	40001429	40001591	40000530	40000749	40003762	40003987	15047	147109131	43,53,24	137411001295	9,9,10	262	100	0	0	0.566,0.44,0.676	0.983,0.979,0.98	-0.42
Map4k4	chr1	y	y	+	40001429	40001591	40000530	40000749	40004806	40004913	15048	155111136	828756771	148011461339	424353408	262	100	0	0	0.067,0.053,0.063	0.571,0.553,0.556	-0.499
Map4k4	chr1	y	y	+	40003762	40003987	40000530	40000749	40004806	40004910	15053	212118402057	828756771	285524022890	424353408	325	100	0	0	0.441,0.428,0.451	0.674,0.677,0.685	-0.239
Myo1b	chr1	y	y	-	51768649	51768736	51763889	51763964	51769003	51769090	16792	153,90,129	20,13,13	74,69,64	53,46,43	187	100	0	0	0.804,0.787,0.841	0.427,0.445,0.443	0.372
Lrrfip1	chr1	y	y	+	91103246	91103318	91101184	91101310	91105126	91105297	24432	588479608	473540537	9,25,20	10418031011	172	100	0	0	0.42,0.34,0.397	0.005,0.018,0.011	0.374
Fn1	chr1	y	y	-	71613762	71614035	71612467	71612650	71615359	71615551	27260	632361454	302220237	147212291479	55,65,62	373	100	0	0	0.359,0.306,0.339	0.878,0.835,0.865	-0.525
Uap1	chr1	y	y	-	170147995	170148043	170143396	170143463	170149270	170149459	32733	256185260	50,31,29	149115131	204184266	148	100	0	0	0.776,0.801,0.858	0.33,0.297,0.25	0.519
Uap1	chr1	y	y	-	170147995	170148046	170143396	170143463	170149270	170149459	32734	400349410	50,31,29	211207223	204184266	151	100	0	0	0.841,0.882,0.904	0.407,0.427,0.357	0.479
Smg7	chr1	y	y	-	152843229	152843379	152841512	152841593	152844035	152844407	54360	34,30,19	285266239	259170229	292215275	250	100	0	0	0.046,0.043,0.031	0.262,0.24,0.25	-0.211
Relch	chr1	y	y	+	105741012	105741095	105740434	105740517	105741296	105741360	55691	10,6,6	78,80,67	41,32,39	43,16,45	183	100	0	0	0.065,0.039,0.047	0.343,0.522,0.321	-0.345
Pam	chr1	y	y	-	97864202	97864520	97853102	97853232	97884125	97884197	55966	809619766	288240254	10919011157	166144164	418	100	1.11e-16	1.66e-14	0.402,0.382,0.419	0.611,0.599,0.628	-0.212
Myo1b	chr1	y	y	-	51768649	51768736	51766821	51766908	51769003	51769090	16793	307196225	63,97,40	142133126	107,99,122	187	100	5.53e-07	4.11e-05	0.723,0.519,0.751	0.415,0.418,0.356	0.268
Gas5	chr1	y	y	+	161036819	161036852	161036207	161036244	161038224	161038272	25708	11,18,10	0,2,0	14,11,9	4,7,0	133	100	0.00040339	0.015883	1.0,0.871,1.0	0.725,0.542,1.0	0.201
Ank3	chr10	y	y	+	69904447	69904510	69904197	69904270	69920437	69920491	52207	114106167	0,0,2	4,5,8	8,2,9	163	100	0	0	1.0,1.0,0.981	0.235,0.605,0.353	0.596
Ank3	chr10	y	y	+	69904447	69904510	69904197	69904270	69927694	69927818	52208	257240309	63,46,56	18,20,16	254199247	163	100	0	0	0.715,0.762,0.772	0.042,0.058,0.038	0.704
Syne1	chr10	y	y	-	5193031	5193172	5185752	5185920	5194472	5194667	1300	9,18,13	2,5,4	24,24,24	0,1,0	241	100	2.2e-07	1.74e-05	0.651,0.599,0.574	1.0,0.909,1.0	-0.362
Aftph	chr11	y	y	-	20696750	20696831	20692464	20692588	20698312	20698373	5438	4,3,8	108,74,122	84,61,72	122,73,99	181	100	0	0	0.02,0.022,0.035	0.276,0.316,0.287	-0.267
Ccdc88a	chr11	y	y	+	29497342	29497426	29493878	29494093	29498408	29498612	18086	206114143	63,53,68	71,44,57	127113137	184	100	0	0	0.64,0.539,0.533	0.233,0.175,0.184	0.373
Ndel1	chr11	y	y	-	68826169	68826204	68822109	68822665	68829914	68830066	50750	141144157	107,87,115	12,13,19	265169207	135	100	0	0	0.494,0.551,0.503	0.032,0.054,0.064	0.466
Synrg	chr11	y	y	+	84039655	84039691	84039210	84039321	84040796	84040928	43841	35,40,35	47,30,32	3,9,12	63,56,61	136	100	6e-15	8.49e-13	0.354,0.495,0.446	0.034,0.106,0.126	0.343
Ehbp1	chr11	y	y	-	22062779	22062887	22059136	22059261	22068358	22068506	56982	7,14,8	32,17,30	53,47,60	5,14,12	208	100	1.31e-14	1.81e-12	0.095,0.284,0.114	0.836,0.617,0.706	-0.555
Coro6	chr11	y	y	+	77467223	77467343	77466417	77466599	77468265	77468370	8009	14,14,20	26,17,27	28,34,51	8,5,4	220	100	2.98e-11	3.32e-09	0.197,0.272,0.252	0.614,0.756,0.853	-0.501
Tanc2	chr11	y	y	+	105914040	105914070	105913356	105913489	105914891	105914983	3162	17,20,21	38,33,40	2,7,6	59,59,48	130	100	9.09e-10	9.05e-08	0.256,0.318,0.288	0.025,0.084,0.088	0.222
Rhot1	chr11	y	y	+	80255861	80255957	80254659	80254862	80257513	80257636	30315	87,61,91	54,62,56	115119115	42,31,32	196	100	2.89e-06	0.000190591	0.451,0.334,0.453	0.583,0.662,0.647	-0.218
Slc16a3	chr11	y	y	+	120954173	120954268	120949052	120949150	120955225	120955273	41920	103,98,76	8,6,3	68,70,61	10,18,20	195	100	5.44e-06	0.000343132	0.868,0.893,0.929	0.777,0.666,0.61	0.212
Ralgapa1	chr12	y	y	-	55612072	55612103	55602898	55604268	55612633	55612758	24302	175210186	1,0,0	106,86,125	69,68,83	131	100	0	0	0.993,1.0,1.0	0.54,0.491,0.535	0.476
Strn3	chr12	y	y	-	51643103	51643214	51629373	51629507	51647993	51648135	32617	51,46,60	404344336	279212251	333279323	211	100	0	0	0.056,0.06,0.078	0.284,0.265,0.269	-0.208
Strn3	chr12	y	y	-	51643103	51643214	51633578	51633719	51647993	51648135	32618	50,40,62	22,27,17	252181272	2,1,6	211	100	0	0	0.519,0.412,0.633	0.984,0.988,0.956	-0.455
Numb	chr12	y	y	-	83825258	83825291	83811285	83811360	83831921	83831996	46540	61,49,57	50,42,36	5,4,2	104,89,75	133	100	0	0	0.478,0.467,0.543	0.035,0.033,0.02	0.467
Mia2	chr12	y	y	+	59146335	59146362	59137697	59137786	59146846	59146872	48337	52,63,64	47,40,42	1,1,2	105,66,101	127	100	0	0	0.466,0.554,0.545	0.007,0.012,0.015	0.51
Mia2	chr12	y	y	+	59146335	59146362	59144698	59144770	59146846	59146872	48338	253212235	129,94,105	1,11,4	242211253	127	100	0	0	0.607,0.64,0.638	0.003,0.039,0.012	0.61
Mark3	chr12	y	y	+	111653389	111653434	111647470	111647728	111655269	111655615	48388	244215248	27,31,13	336239324	339219322	145	100	0	0	0.862,0.827,0.929	0.406,0.429,0.41	0.458
Slc38a6	chr12	y	y	+	73293698	73293799	73292159	73292233	73310144	73310197	4874	24,23,26	79,49,70	101,60,95	29,41,41	201	100	2.31e-14	3.14e-12	0.131,0.189,0.156	0.634,0.421,0.535	-0.371
Tut7	chr13	y	y	-	59779136	59779201	59778751	59778815	59782017	59782343	45518	71,91,87	30,61,46	15,20,12	89,70,98	165	100	0	0	0.589,0.475,0.534	0.093,0.148,0.069	0.429
Rps24	chr14	y	y	+	24494051	24494069	24493382	24493493	24495429	24495449	1111	360186304	189291251316326	143173152	294551296	118	100	0	0	0.016,0.012,0.016	0.292,0.21,0.303	-0.254
Rps24	chr14	y	y	+	24495429	24495449	24493382	24493493	24495774	24495823	1113	190541264216403	152013671243	296554297	151501292716505	120	100	0	0	0.913,0.885,0.917	0.016,0.034,0.015	0.883
Rps24	chr14	y	y	+	24495429	24495449	24494051	24494069	24495774	24495823	1114	356241253	16,18,22	30,57,42	350287355	120	100	0	0	0.949,0.918,0.906	0.067,0.142,0.09	0.825
Zdhhc20	chr14	y	y	-	57837590	57837667	57832702	57836646	57839089	57839205	10578	97,101,85	66,51,64	351267348	1,1,1	177	100	0	0	0.454,0.528,0.429	0.995,0.993,0.995	-0.524
Slc4a7	chr14	y	y	+	14793949	14794057	14791051	14791164	14796076	14796309	27364	216278259	56,29,40	403292349	1,1,0	208	100	0	0	0.65,0.822,0.757	0.995,0.993,1.0	-0.253
Ccser2	chr14	y	y	-	36890341	36890426	36874935	36879762	36896254	36896344	39732	108,73,103	8,9,14	35,39,43	37,51,64	185	100	0	0	0.879,0.814,0.799	0.338,0.292,0.266	0.532
Slmap	chr14	y	y	-	26416202	26416292	26413167	26414988	26418112	26418247	42675	397395387	11,19,14	147120165	163120160	190	100	0	0	0.95,0.916,0.936	0.322,0.345,0.352	0.594
Pbrm1	chr14	y	y	+	31113848	31114004	31107108	31107310	31117012	31117083	51277	650552566	140102117	1013770934	62,43,48	256	100	0	0	0.645,0.679,0.654	0.865,0.875,0.884	-0.215
Akap11	chr14	y	y	-	78502938	78503022	78502189	78502236	78507724	78507880	63468	87,86,61	130125167	218172195	65,71,81	184	100	0	0	0.267,0.272,0.166	0.646,0.568,0.567	-0.359
Ccser2	chr14	y	y	-	36890293	36890426	36879142	36879762	36896254	36896344	39731	38,24,36	8,9,14	13,22,14	37,51,64	233	100	2.22e-16	3.3e-14	0.671,0.534,0.525	0.131,0.156,0.086	0.452
Rai14	chr15	y	y	-	10589258	10589345	10587837	10587924	10591586	10591615	35370	77,37,58	152101145	389308401	0,6,0	187	100	0	0	0.213,0.164,0.176	1.0,0.965,1.0	-0.804
Kif21a	chr15	y	y	-	90964974	90964995	90959687	90959748	90965466	90965632	54952	53,33,39	9,4,9	28,29,25	66,40,56	121	100	0	0	0.83,0.872,0.782	0.26,0.375,0.27	0.526
Sbf1	chr15	y	y	-	89295951	89296029	89295394	89295576	89299482	89299620	63230	983869933	11,10,8	109109117	494377486	178	100	0	0	0.98,0.98,0.985	0.11,0.14,0.119	0.859
Tmbim6	chr15	y	y	+	99399656	99399871	99392985	99393040	99400060	99400207	7229	54,51,19	3,0,0	33,36,54	4,6,5	315	100	0.000128564	0.00584147	0.851,1.0,1.0	0.724,0.656,0.774	0.232
Acap2	chr16	y	y	-	31122620	31122641	31119395	31119447	31127320	31127433	6688	29,22,30	98,76,84	0,1,0	112,103,87	121	100	0	0	0.197,0.193,0.228	0.0,0.008,0.0	0.203
Cd47	chr16	y	y	+	49908702	49908735	49906780	49906812	49910868	49910876	7923	1,0,0	249253266	116110127	6,11,1	133	100	0	0	0.003,0.0,0.0	0.936,0.883,0.99	-0.935
Cd47	chr16	y	y	+	49908702	49908735	49906780	49906812	49910873	49911091	7924	0,0,0	3,2,5	10,10,9	0,0,0	133	100	0	0	0.0,0.0,0.0	1.0,1.0,1.0	-1
Cd47	chr16	y	y	+	49908702	49908735	49908053	49908078	49910868	49910876	7925	6,2,5	15,17,10	464430516	0,3,1	133	100	0	0	0.231,0.081,0.273	1.0,0.991,0.997	-0.801
Phldb2	chr16	y	y	-	45788988	45789117	45781301	45781457	45801491	45801571	48812	203206224	47,36,43	375241293	4,7,3	229	100	0	0	0.654,0.714,0.695	0.976,0.938,0.977	-0.276
Atp13a3	chr16	y	y	-	30321805	30321895	30312422	30315901	30322871	30322952	19968	543363502	345294317	763532723	151184234	190	100	1.48e-11	1.69e-09	0.453,0.394,0.455	0.727,0.603,0.619	-0.216
Tjap1	chr17	y	y	-	46271799	46271929	46264882	46264978	46282345	46282439	7813	551449504	513418491	135911031433	193198198	230	100	0	0	0.318,0.318,0.309	0.754,0.708,0.759	-0.425
Spast	chr17	y	y	+	74359253	74359349	74356085	74356169	74367247	74367435	23291	171171223	35,45,54	356249315	1,0,5	196	100	0	0	0.714,0.66,0.678	0.995,1.0,0.97	-0.304
Atat1	chr17	y	y	-	35902355	35902438	35901982	35902054	35904107	35904176	58630	9,14,25	17,12,25	28,22,25	3,4,3	183	100	3.05e-09	2.93e-07	0.224,0.389,0.353	0.836,0.75,0.82	-0.48
Atp9b	chr18	y	y	-	80736811	80736844	80734140	80736149	80738652	80738781	48421	29,25,39	178116149	115,93,156	57,69,82	133	100	0	0	0.109,0.139,0.164	0.603,0.503,0.589	-0.428
Sorbs1	chr19	y	y	-	40300242	40300302	40299462	40299521	40311668	40311748	21899	23,17,22	7,1,2	7,6,4	14,9,12	160	100	2.54e-09	2.45e-07	0.673,0.914,0.873	0.238,0.294,0.172	0.585
Nsfl1c	chr2	y	y	+	151502454	151502460	151500714	151500789	151503013	151503179	18065	843643764	57,60,42	627545670	344287334	106	100	0	0	0.933,0.91,0.945	0.632,0.642,0.654	0.287
Neb	chr2	y	y	-	52165166	52165277	52164591	52164702	52167559	52167664	21466	185,71,169	21,6,8	2,6,3	102,77,103	211	100	0	0	0.807,0.849,0.909	0.009,0.036,0.014	0.835
Osbpl6	chr2	y	y	+	76555889	76555982	76555013	76555117	76564783	76564949	32474	25,17,29	37,31,34	80,56,77	0,2,1	193	100	0	0	0.259,0.221,0.306	1.0,0.936,0.976	-0.709
Sec16a	chr2	y	y	-	26413678	26413738	26412835	26412913	26414370	26414445	35757	169136162	114,92,109	13,16,7	259182229	160	100	0	0	0.481,0.48,0.482	0.03,0.052,0.019	0.447
Prpf40a	chr2	y	y	-	53159262	53159316	53157892	53157917	53159557	53159678	46233	969774933	0,1,0	651593590	221136202	154	100	0	0	1.0,0.998,1.0	0.657,0.739,0.655	0.316
Fmnl2	chr2	y	y	+	53128716	53128842	53126852	53126976	53130411	53130505	51706	1,1,1	51,46,38	27,22,29	50,24,46	226	100	0	0	0.009,0.01,0.012	0.193,0.289,0.218	-0.223
Fmnl2	chr2	y	y	+	53128716	53128842	53126852	53126976	53131839	53132203	51707	1,1,1	6,14,13	16,22,24	2,2,1	226	100	0	0	0.069,0.031,0.033	0.78,0.83,0.914	-0.797
Sptan1	chr2	y	y	+	30001099	30001159	29999913	30000062	30002230	30002429	59921	479301388	362265326	1023783975	52,82,75	160	100	0	0	0.453,0.415,0.427	0.925,0.856,0.89	-0.459
Ect2	chr3	y	y	-	27148794	27148887	27146836	27147019	27148992	27149069	4557	176128174	245192258	334269320	90,68,127	193	100	0	0	0.271,0.257,0.259	0.658,0.672,0.566	-0.37
Nexn	chr3	y	y	-	152253611	152253803	152253050	152253129	152255284	152255311	17216	359235304	219133230	76,44,93	319276293	292	100	0	0	0.36,0.377,0.312	0.075,0.052,0.098	0.275
Ank2	chr3	y	y	-	126941609	126947807	126940071	126940146	126950734	126950756	24854	82,91,58	41,40,54	571446525	30,16,31	6298	100	0	0	0.031,0.035,0.017	0.232,0.307,0.212	-0.223
Adgrl2	chr3	y	y	-	148821279	148821408	148815585	148817928	148822954	148823051	31122	0,0,2	60,27,57	92,75,102	47,42,70	229	100	0	0	0.0,0.0,0.015	0.461,0.438,0.389	-0.424
Depdc1a	chr3	y	y	+	159522525	159523356	159520829	159520970	159523776	159523949	53382	184126223	120,95,132	923643871	2,1,0	931	100	0	0	0.141,0.125,0.154	0.98,0.986,1.0	-0.849
Gpsm2	chr3	y	y	-	108711276	108711580	108702864	108703086	108722040	108722309	62806	218166226	51,58,64	473350502	16,19,24	404	100	0	0	0.514,0.415,0.466	0.88,0.82,0.838	-0.381
Adgrl2	chr3	y	y	-	148821279	148821408	148815585	148817928	148822987	148823051	31123	0,0,2	1,2,4	69,39,63	3,0,2	229	100	1.3e-11	1.5e-09	0.0,0.0,0.179	0.909,1.0,0.932	-0.887
Adgrl2	chr3	y	y	-	148821279	148821408	148820972	148821054	148822954	148823051	31126	0,0,2	2,3,2	39,45,65	2,2,2	229	100	1.28e-10	1.36e-08	0.0,0.0,0.304	0.895,0.908,0.934	-0.811
Rapgef2	chr3	y	y	-	79169738	79169756	79112170	79112302	79172907	79173075	13842	20,27,19	9,6,20	7,8,7	34,36,34	118	100	6.12e-09	5.66e-07	0.653,0.792,0.446	0.149,0.158,0.149	0.478
4932438A13Rik	chr3	y	y	+	36992676	36992727	36989794	36989888	36994774	36994981	52740	21,11,14	19,20,19	7,4,0	23,42,24	151	100	3.27e-07	2.54e-05	0.423,0.267,0.328	0.168,0.059,0.0	0.264
Emc1	chr4	y	y	+	139364330	139364339	139363656	139363779	139365194	139365394	11531	42,27,52	167193141	135140173	61,43,78	109	100	0	0	0.187,0.114,0.253	0.67,0.749,0.67	-0.512
Map3k6	chr4	y	y	+	133243052	133243076	133242817	133242957	133243310	133243501	16953	71,70,62	0,0,0	32,20,26	22,9,17	124	100	0	0	1.0,1.0,1.0	0.54,0.642,0.552	0.422
Ptprd	chr4	y	y	-	76095519	76095546	76091421	76091539	76099411	76099605	27433	76,58,62	3,9,1	48,51,31	39,32,31	127	100	0	0	0.952,0.835,0.98	0.492,0.557,0.441	0.426
Clstn1	chr4	y	y	+	149626086	149626116	149614049	149614172	149627211	149627325	39429	137190149	125114109	1,4,0	215150279	130	100	0	0	0.457,0.562,0.513	0.004,0.02,0.0	0.503
Nfib	chr4	y	y	-	82310302	82310391	82290172	82296811	82320473	82320556	54514	45,41,46	32,26,46	132103125	10,9,19	189	100	0	0	0.427,0.455,0.346	0.875,0.858,0.777	-0.427
Dock7	chr4	y	y	-	98993646	98993736	98991392	98991459	99001032	99001202	58023	24,19,23	10,8,8	143,92,146	1,0,3	190	100	0	0	0.558,0.556,0.602	0.987,1.0,0.962	-0.411
Dock7	chr4	y	y	-	98993646	98993736	98992368	98992458	99001032	99001202	58024	36,43,42	167164157	301244300	86,79,96	190	100	0	0	0.102,0.121,0.123	0.648,0.619,0.622	-0.514
Tnc	chr4	y	y	-	63984459	63984732	63982650	63982923	63993026	63993299	61903	326826722634	159514701566	840608759	210816032125	373	100	0	0	0.355,0.328,0.311	0.097,0.092,0.087	0.239
Tnc	chr4	y	y	-	63984459	63984732	63982650	63982923	64000697	64000970	61905	240720631958	8,12,5	684495617	83,65,71	373	100	0	0	0.988,0.979,0.991	0.688,0.671,0.7	0.3
Tnc	chr4	y	y	-	63984459	63984732	63982650	63982923	64006245	64006509	61906	240820631958	28,29,31	684494617	86,81,91	373	100	0	0	0.958,0.95,0.944	0.681,0.621,0.645	0.302
Fsd1l	chr4	y	y	+	53655740	53655763	53649791	53649893	53659512	53659634	27632	0,0,7	6,8,4	60,42,58	1,1,1	123	100	4.71e-14	6.29e-12	0.0,0.0,0.587	0.98,0.972,0.979	-0.781
Eif4g3	chr4	y	y	+	138087532	138087565	138084256	138084370	138096751	138096931	52444	16,6,9	31,22,16	1,1,0	28,29,27	133	100	3.09e-10	3.16e-08	0.28,0.17,0.297	0.026,0.025,0.0	0.232
Nfib	chr4	y	y	-	82310302	82310391	82290172	82296811	82327728	82327913	54515	20,25,20	61,43,75	67,65,62	57,47,61	189	100	5.64e-09	5.27e-07	0.148,0.235,0.124	0.383,0.423,0.35	-0.216
Clip1	chr5	y	y	-	123638955	123638988	123630224	123631169	123640493	123640554	56898	47,45,42	72,52,65	0,0,0	106,96,116	133	100	0	0	0.329,0.394,0.327	0.0,0.0,0.0	0.35
Clip1	chr5	y	y	-	123638955	123638988	123635173	123635278	123640493	123640554	56899	63,49,58	1,1,0	0,0,0	31,15,24	133	100	0	0	0.979,0.974,1.0	0.0,0.0,0.0	0.984
Wasf3	chr5	y	y	+	146465849	146466019	146460964	146461140	146466797	146467064	26783	45,46,30	0,0,0	19,11,20	8,8,7	270	100	3.66e-15	5.22e-13	1.0,1.0,1.0	0.468,0.337,0.514	0.56
Thap6	chr5	y	y	+	91963682	91963785	91962889	91962978	91965095	91965304	28286	26,11,18	0,4,0	10,4,11	9,4,9	203	100	3.42e-06	0.000223028	1.0,0.575,1.0	0.354,0.33,0.376	0.505
Cald1	chr6	y	y	+	34747885	34747969	34745980	34746639	34753442	34753588	15738	212173216	243275262	887727932	257209280	184	100	0	0	0.322,0.255,0.309	0.652,0.654,0.644	-0.355
Cald1	chr6	y	y	+	34747885	34747969	34746006	34746015	34753442	34753588	15739	239201256	799646669	566461589	445393460	184	100	0	0	0.14,0.145,0.172	0.409,0.389,0.41	-0.25
Cald1	chr6	y	y	+	34747891	34747969	34745618	34746015	34753442	34753588	15740	143117156	799646669	440359444	445393460	178	100	0	0	0.091,0.092,0.116	0.357,0.339,0.352	-0.25
Cald1	chr6	y	y	+	34747891	34747969	34745618	34746639	34753442	34753588	15741	144117156	243275262	447359444	257209280	178	100	0	0	0.25,0.193,0.251	0.494,0.491,0.471	-0.254
Erc1	chr6	y	y	-	119777978	119778071	119773733	119773901	119779476	119779632	38816	95,84,84	23,23,17	26,11,11	82,95,95	193	100	0	0	0.682,0.654,0.719	0.141,0.057,0.057	0.6
Erc1	chr6	y	y	-	119777987	119778071	119773733	119773901	119779476	119779632	38817	187142158	23,23,17	48,18,25	82,95,95	184	100	0	0	0.815,0.77,0.835	0.241,0.093,0.125	0.654
Osbpl3	chr6	y	y	-	50333185	50333293	50328669	50328804	50336214	50336345	41016	42,38,34	117,93,98	252216274	39,31,30	208	100	0	0	0.147,0.164,0.143	0.756,0.77,0.815	-0.629
Wnk1	chr6	y	y	-	119952684	119952969	119951897	119951995	119956070	119956196	65191	166412721321	438426413	333526362969	38,27,23	385	100	0	0	0.497,0.437,0.454	0.958,0.962,0.971	-0.501
Wnk1	chr6	y	y	-	119953770	119953902	119951897	119951995	119956070	119956170	65192	24,32,30	438426413	78,63,66	38,27,23	232	100	0	0	0.023,0.031,0.03	0.469,0.501,0.553	-0.48
Wnk1	chr6	y	y	-	119953770	119954232	119951897	119951995	119956070	119956196	65194	277212217	438426413	837589696	38,27,23	562	100	0	0	0.101,0.081,0.085	0.797,0.795,0.843	-0.723
Ppfia1	chr7	y	y	-	144488690	144488717	144485032	144485208	144489196	144489259	7178	0,0,0	12,4,4	180161180	5,4,4	127	100	0	0	0.0,0.0,0.0	0.966,0.969,0.973	-0.969
Ppfia1	chr7	y	y	-	144488690	144488717	144485032	144485208	144491451	144491652	7179	0,0,0	354280347	54,51,69	161133191	127	100	0	0	0.0,0.0,0.0	0.209,0.232,0.221	-0.221
Tnnt3	chr7	y	y	+	142502739	142502757	142501828	142501842	142504047	142504065	23510	241,52,205	115,82,98	4,16,8	219213236	118	100	0	0	0.64,0.35,0.639	0.015,0.06,0.028	0.509
Picalm	chr7	y	y	+	90182218	90182368	90177499	90177603	90189149	90189257	29915	832575724	10938191016	325024863148	179,94,143	250	100	0	0	0.233,0.219,0.222	0.879,0.914,0.898	-0.672
Prc1	chr7	y	y	+	80313526	80313568	80313031	80313131	80315113	80315517	39626	313262299	289253290	165113115	546435562	142	100	0	0	0.433,0.422,0.421	0.175,0.155,0.126	0.273
Prc1	chr7	y	y	+	80313526	80313568	80313031	80313208	80315113	80315517	39627	730520679	293191272	326240311	372305379	142	100	0	0	0.637,0.657,0.637	0.382,0.357,0.366	0.275
Prc1	chr7	y	y	+	80313529	80313568	80313031	80313131	80315113	80316257	39628	237182226	289253290	112,77,93	546435562	139	100	0	0	0.371,0.341,0.359	0.129,0.113,0.106	0.241
Prc1	chr7	y	y	+	80313529	80313568	80313031	80313208	80315113	80316257	39629	247190233	293191272	120,80,92	372305379	139	100	0	0	0.378,0.417,0.381	0.188,0.159,0.149	0.227
Sytl2	chr7	y	y	+	90388867	90388915	90386998	90387556	90392358	90392453	59410	10967401015	32,19,29	17,46,30	778609723	148	100	0	0	0.959,0.963,0.959	0.015,0.049,0.027	0.93
Nav2	chr7	y	y	+	49575246	49575255	49572307	49572453	49575647	49575820	31278	56,28,64	20,17,28	38,31,27	49,34,69	109	100	1.19e-06	8.41e-05	0.72,0.602,0.677	0.416,0.455,0.264	0.288
Pard3	chr8	y	y	+	127410728	127410773	127409555	127409707	127415569	127415797	5088	27,37,26	85,65,81	230184229	0,4,0	145	100	0	0	0.18,0.282,0.181	1.0,0.969,1.0	-0.775
Pard3	chr8	y	y	+	127410731	127410773	127409555	127409707	127415569	127415797	5091	15,21,11	85,65,81	104,58,78	0,4,0	142	100	0	0	0.111,0.185,0.087	1.0,0.911,1.0	-0.843
Pard3	chr8	y	y	+	127410728	127410773	127409555	127409704	127415569	127415797	5087	16,23,12	5,9,5	123,71,96	0,0,0	145	100	9.99e-16	1.46e-13	0.688,0.638,0.623	1.0,1.0,1.0	-0.35
Pard3	chr8	y	y	+	127410731	127410773	127409555	127409617	127415569	127415797	5090	15,19,11	4,2,3	103,58,78	0,0,0	142	100	1.34e-06	9.36e-05	0.725,0.87,0.721	1.0,1.0,1.0	-0.228
Pard3	chr8	y	y	+	127410728	127410773	127409555	127409707	127426521	127426684	5089	8,13,8	3,2,2	69,71,87	0,0,0	145	100	3.6e-05	0.00191884	0.648,0.818,0.734	1.0,1.0,1.0	-0.267
Clasp2	chr9	y	y	+	113887044	113887047	113881687	113881751	113889957	113890121	26384	77,47,70	4,0,3	21,12,3	90,64,73	103	100	0	0	0.949,1.0,0.958	0.185,0.154,0.038	0.843
Anln	chr9	y	y	-	22349246	22349300	22339001	22339088	22350919	22351032	43501	292238330	616356565	54,47,68	694538670	154	100	0	0	0.235,0.303,0.275	0.048,0.054,0.062	0.216
Golga4	chr9	y	y	+	118519085	118519184	118514179	118514269	118522517	118522583	46158	78,49,66	22,19,21	0,0,0	60,59,72	199	100	0	0	0.64,0.564,0.612	0.0,0.0,0.0	0.605
Golga4	chr9	y	y	+	118579541	118579606	118577141	118577228	118581848	118582519	46170	9,6,13	184174179	277186262	54,52,45	165	100	0	0	0.029,0.02,0.042	0.757,0.684,0.779	-0.71
Myo5a	chr9	y	y	+	75192383	75192464	75189899	75190000	75193938	75194100	48359	501532525	15,14,5	24,26,26	333227272	181	100	0	0	0.949,0.955,0.983	0.038,0.06,0.05	0.913
Myo9a	chr9	y	y	+	59790035	59790092	59788414	59788514	59801913	59802011	53553	3,9,2	32,26,19	37,33,17	15,25,11	157	100	1.25e-11	1.45e-09	0.056,0.181,0.063	0.611,0.457,0.496	-0.421
Cask	chrX	y	y	-	13550946	13550982	13549164	13549361	13552372	13552441	20665	87,80,89	36,42,36	9,8,10	123108118	136	100	0	0	0.64,0.583,0.645	0.051,0.052,0.059	0.569
Cask	chrX	y	y	-	13552372	13552441	13550946	13550982	13554877	13554946	20668	108,98,97	34,25,40	85,83,85	0,2,2	169	100	0	0	0.653,0.699,0.589	1.0,0.961,0.962	-0.327
Cask	chrX	y	y	-	13550946	13550982	13549164	13549361	13554877	13554946	20666	73,53,67	6,6,11	4,4,5	11,8,12	136	100	4.44e-16	6.57e-14	0.899,0.867,0.817	0.211,0.269,0.235	0.623
Arhgef6	chrX	y	y	-	57241805	57241826	57240593	57240687	57243389	57243515	60474	30,23,33	14,9,24	56,65,50	1,1,4	121	100	6.38e-14	8.39e-12	0.639,0.679,0.532	0.979,0.982,0.912	-0.341
Arhgef6	chrX	y	y	-	57241805	57241826	57240593	57240687	57244604	57244750	60475	7,3,7	4,10,10	11,11,9	1,0,2	121	100	5.69e-07	4.22e-05	0.591,0.199,0.366	0.901,1.0,0.788	-0.511
Mff	chr1	y	n	+	82741817	82741976	82735418	82735507	82747082	82747142	527	176,85,160	124131131	499444557	79,48,57	259	100	0	0	0.354,0.2,0.32	0.709,0.781,0.79	-0.469
Prrc2c	chr1	y	n	-	162675604	162675841	162670726	162673656	162676690	162676817	3706	12078601058	896647757	303621662799	743575612	337	100	0	0	0.286,0.283,0.293	0.548,0.528,0.576	-0.263
Prrc2c	chr1	y	n	-	162675604	162675841	162674102	162674151	162676690	162676817	3707	1042746930	637468541	249417742247	428300353	337	100	0	0	0.327,0.321,0.338	0.634,0.637,0.654	-0.313
Fam135a	chr1	y	n	-	24049129	24049207	24046357	24046407	24053182	24053336	11491	141137176	5,2,6	38,38,38	58,58,61	178	100	0	0	0.941,0.975,0.943	0.269,0.269,0.259	0.687
Ppip5k2	chr1	y	n	-	97721105	97721279	97719833	97719906	97723669	97723834	19131	172169151	144128148	11,9,3	275160245	274	100	0	0	0.304,0.325,0.271	0.014,0.02,0.004	0.287
Dst	chr1	y	n	+	34296741	34296759	34295461	34295536	34299720	34299838	36099	369309321	59,74,64	72,92,92	410300390	118	100	0	0	0.841,0.78,0.81	0.13,0.206,0.167	0.643
Kifap3	chr1	y	n	+	163912071	163912137	163888205	163888305	163915724	163917109	54936	37,37,35	148130166	185168147	64,49,55	166	100	0	0	0.131,0.146,0.113	0.635,0.674,0.617	-0.512
Relch	chr1	y	n	+	105740434	105740517	105735922	105736022	105741012	105741095	55688	78,62,74	1,1,0	47,34,41	16,12,29	183	100	0	0	0.977,0.971,1.0	0.616,0.608,0.436	0.429
Map2	chr1	y	n	+	66431526	66431619	66425196	66425528	66433513	66433595	64529	94,90,81	0,2,1	34,22,41	25,17,23	193	100	0	0	1.0,0.959,0.977	0.413,0.401,0.48	0.547
Pikfyve	chr1	y	n	+	65192530	65192566	65192144	65192294	65195655	65195774	25516	9,2,8	22,33,28	24,27,33	13,13,17	136	100	1.88e-11	2.13e-09	0.231,0.043,0.174	0.576,0.604,0.588	-0.44
Lrrfip1	chr1	y	n	+	91073323	91073341	91068562	91068649	91082140	91082179	24367	3,4,0	4,3,5	5,1,10	0,0,0	118	100	5.82e-11	6.36e-09	0.389,0.531,0.0	1.0,1.0,1.0	-0.693
Myl1	chr1	y	n	-	66925022	66925065	66924294	66924557	66926207	66926285	63298	138,11,77	0,0,0	8,3,8	4,3,3	143	100	3e-10	3.07e-08	1.0,1.0,1.0	0.583,0.412,0.651	0.451
Pikfyve	chr1	y	n	+	65192533	65192566	65192144	65192294	65195655	65195774	25517	6,2,3	22,33,28	15,20,16	13,13,17	133	100	4.41e-10	4.45e-08	0.17,0.044,0.075	0.465,0.536,0.414	-0.375
Lrrfip1	chr1	y	n	+	91093559	91093637	91084945	91085005	91100576	91100581	24428	205147188	67,88,66	99,100,88	114102123	178	100	1.21e-09	1.2e-07	0.632,0.484,0.615	0.328,0.355,0.287	0.254
Lrrfip1	chr1	y	n	+	91079030	91079081	91068562	91068649	91082140	91082179	24385	9,4,12	4,3,5	7,2,3	0,0,0	151	100	2.38e-08	2.1e-06	0.598,0.469,0.614	1.0,1.0,1.0	-0.44
Cspp1	chr1	y	n	+	10085746	10085952	10083500	10083558	10088050	10088184	1877	209176176	17,6,7	115,88,135	20,13,25	306	100	1.75e-06	0.000120504	0.801,0.906,0.892	0.653,0.689,0.638	0.206
Mgat5	chr1	y	n	+	127249789	127249839	127205017	127205427	127306633	127307016	47000	21,35,24	5,12,8	27,29,28	2,2,1	150	100	3.5e-05	0.0018712	0.737,0.66,0.667	0.9,0.906,0.949	-0.23
Osbpl8	chr10	y	n	+	111224671	111224708	111204734	111204840	111233552	111233690	22975	23,28,31	37,33,27	77,77,96	5,10,13	137	100	0	0	0.312,0.382,0.456	0.918,0.849,0.844	-0.487
Reps1	chr10	y	n	+	18107667	18107748	18104153	18104275	18114398	18114486	45696	217157201	131105136	391278368	57,32,40	181	100	0	0	0.478,0.452,0.45	0.791,0.828,0.836	-0.358
Reps1	chr10	y	n	+	18107670	18107748	18104153	18104275	18114398	18114486	45697	130105107	131105136	236198237	57,32,40	178	100	0	0	0.358,0.36,0.307	0.699,0.777,0.769	-0.407
Stxbp5	chr10	y	n	-	9784187	9784235	9778020	9778071	9784340	9784400	36611	70,41,75	5,3,11	8,12,21	20,13,18	148	100	1.96e-13	2.49e-11	0.904,0.902,0.822	0.213,0.384,0.441	0.53
Nhsl1	chr10	y	n	+	18516028	18516160	18511549	18511742	18523790	18525959	36516	18,18,4	20,12,27	65,43,43	13,18,11	232	100	6.39e-06	0.000397786	0.28,0.393,0.06	0.683,0.507,0.628	-0.362
Bptf	chr11	y	n	-	107095001	107095190	107082512	107082700	107095715	107095925	10740	202225225	90,100,62	39,31,24	139139143	289	100	0	0	0.437,0.438,0.557	0.088,0.072,0.055	0.406
Nf1	chr11	y	n	+	79463232	79463295	79458770	79458906	79468716	79468875	30477	127110127	17,19,18	50,39,40	81,70,80	163	100	0	0	0.821,0.78,0.812	0.275,0.255,0.235	0.549
Synrg	chr11	y	n	+	83985248	83985551	83982195	83982307	83987912	83987990	43832	103122111	0,0,0	17,15,12	28,45,42	403	100	0	0	1.0,1.0,1.0	0.131,0.076,0.066	0.909
Nf2	chr11	y	n	-	4780577	4780622	4767664	4768273	4782186	4782352	54773	437299378	64,78,88	199155192	170156176	145	100	0	0	0.825,0.726,0.748	0.447,0.407,0.429	0.339
Ogdh	chr11	y	n	+	6316977	6317080	6316764	6316855	6334532	6334648	58694	691502649	26,34,29	503416485	150121176	203	100	0	0	0.929,0.879,0.917	0.623,0.629,0.576	0.299
Bptf	chr11	y	n	-	107095001	107095190	107086711	107086897	107095715	107095925	10741	156178159	1,2,2	33,23,20	9,7,8	289	100	2.22e-16	3.3e-14	0.982,0.969,0.965	0.559,0.532,0.464	0.454
Coro6	chr11	y	n	+	77467749	77467869	77466417	77466599	77468265	77468370	8010	33,20,31	26,17,27	57,56,51	8,5,4	220	100	8.53e-14	1.11e-11	0.366,0.348,0.343	0.764,0.836,0.853	-0.465
Ogdh	chr11	y	n	+	6316977	6317080	6316764	6316855	6324877	6324922	58693	22,23,19	0,0,0	12,4,14	3,1,12	203	100	2.95e-10	3.04e-08	1.0,1.0,1.0	0.663,0.663,0.365	0.436
Bcas3	chr11	y	n	+	85822021	85822112	85801820	85801952	85825201	85825390	37739	21,12,34	23,25,48	47,57,50	20,10,18	191	100	4.97e-08	4.25e-06	0.323,0.201,0.271	0.552,0.749,0.593	-0.366
Strada	chr11	y	n	-	106184561	106184619	106173678	106173781	106187124	106187180	61418	20,27,30	84,55,85	41,35,48	48,36,40	158	100	2e-07	1.6e-05	0.131,0.237,0.183	0.351,0.381,0.432	-0.204
Strada	chr11	y	n	-	106184561	106184619	106173678	106173781	106187100	106187180	61417	46,37,31	49,37,52	54,52,93	40,27,33	158	100	0.000258351	0.0108994	0.373,0.388,0.274	0.461,0.549,0.641	-0.205
Inf2	chr12	y	n	+	112612547	112612604	112611409	112612036	112614894	112614957	18666	1077750997	24,40,36	149125102	656452563	157	100	0	0	0.966,0.923,0.946	0.126,0.15,0.103	0.819
Klc1	chr12	y	n	+	111793648	111793699	111789324	111789486	111795547	111795678	32136	50,34,51	259221227	105,81,89	150118128	151	100	0	0	0.113,0.092,0.13	0.317,0.313,0.315	-0.203
Mark3	chr12	y	n	+	111651957	111651984	111639936	111640040	111655269	111656160	48385	10,18,7	0,0,2	0,0,0	7,2,6	127	100	0	0	1.0,1.0,0.734	0.0,0.0,0.0	0.911
Mark3	chr12	y	n	+	111651957	111651984	111647470	111647728	111653389	111653434	48386	709550616	3,0,1	7,23,8	218155213	127	100	0	0	0.995,1.0,0.998	0.025,0.105,0.029	0.945
Mark3	chr12	y	n	+	111651957	111651984	111647470	111647728	111655269	111656160	48387	156139151	27,31,13	0,2,2	339219322	127	100	0	0	0.82,0.779,0.901	0.0,0.007,0.005	0.829
Heatr5a	chr12	y	n	-	51912204	51912231	51909957	51910093	51914973	51915143	53347	69,40,53	265172230	179155206	102,87,125	127	100	0	0	0.17,0.155,0.154	0.58,0.584,0.565	-0.417
Nin	chr12	y	n	-	70042131	70044252	70040754	70040880	70045146	70045637	64393	330331532951	0,0,0	200260195	95,70,104	2221	100	0	0	1.0,1.0,1.0	0.087,0.143,0.078	0.897
Spata7	chr12	y	n	+	98634223	98634319	98631962	98632037	98637565	98637613	48881	55,49,46	3,2,3	35,33,48	11,11,11	196	100	1.96e-06	0.000133781	0.903,0.926,0.887	0.619,0.605,0.69	0.267
Strn3	chr12	y	n	-	51633578	51633719	51629373	51629507	51643103	51643214	32614	97,96,100	11,15,13	197133197	75,61,50	241	100	4.91e-06	0.00031327	0.785,0.726,0.761	0.522,0.475,0.62	0.218
Pcnx	chr12	y	n	+	81928241	81928374	81913385	81913475	81946930	81947021	45891	3,15,5	2,1,3	19,9,19	0,2,0	233	100	0.000228944	0.00981962	0.392,0.866,0.417	1.0,0.659,1.0	-0.328
Kif13a	chr13	y	n	-	46760662	46760767	46752080	46752872	46761272	46761424	14191	25,23,31	68,63,77	105,87,168	50,25,37	205	100	0	0	0.152,0.151,0.164	0.506,0.629,0.689	-0.452
Mast4	chr13	y	n	-	102754055	102754256	102751380	102751610	102758501	102758737	49260	87,56,88	152130159	418354442	86,77,92	301	100	0	0	0.16,0.125,0.155	0.618,0.604,0.615	-0.466
Trappc13	chr13	y	n	-	104152164	104152182	104150049	104150183	104154295	104154340	55672	176124173	155132192	46,41,37	306214254	118	100	0	0	0.49,0.443,0.433	0.113,0.14,0.11	0.334
Erbin	chr13	y	n	-	103824719	103824848	103823313	103823406	103833497	103835028	57707	236189226	255184214	547452510	65,53,61	229	100	0	0	0.288,0.31,0.316	0.786,0.788,0.785	-0.482
Erbin	chr13	y	n	-	103824719	103824926	103823313	103823406	103833497	103835028	57710	359301351	255184214	879686785	65,53,61	307	100	0	0	0.314,0.348,0.348	0.815,0.808,0.807	-0.473
Erbin	chr13	y	n	-	103830187	103830331	103823313	103823406	103833497	103835028	57716	20,12,11	255184214	280203239	65,53,61	244	100	0	0	0.031,0.026,0.021	0.638,0.611,0.616	-0.596
Erbin	chr13	y	n	-	103830187	103830331	103824719	103824926	103833497	103835028	57717	20,13,11	12,13,17	280203233	13,13,15	244	100	0	0	0.406,0.291,0.21	0.898,0.865,0.864	-0.573
Erbin	chr13	y	n	-	103830187	103830331	103827906	103828023	103833497	103835028	57718	31,22,17	154151143	421321411	209168227	244	100	0	0	0.076,0.056,0.046	0.452,0.439,0.426	-0.38
Slmap	chr14	y	n	-	26429787	26429910	26428241	26428316	26438678	26438738	42677	406318362	68,51,61	632439633	2,0,0	223	100	0	0	0.728,0.737,0.727	0.993,1.0,1.0	-0.267
Pbrm1	chr14	y	n	+	31110414	31110579	31107108	31107310	31117012	31117083	51276	174186216	140102117	449298458	62,43,48	265	100	0	0	0.319,0.408,0.411	0.732,0.723,0.783	-0.367
Ppp3cb	chr14	y	n	-	20503246	20503276	20499363	20501662	20508623	20508721	60727	364322365	185162207	328235282	372286341	130	100	4.07e-14	5.47e-12	0.602,0.605,0.576	0.404,0.387,0.389	0.201
Pbrm1	chr14	y	n	+	31110414	31110579	31107108	31107310	31113848	31114004	51275	212220229	177140144	681423610	165144197	265	100	6.66e-13	8.27e-11	0.311,0.372,0.375	0.609,0.526,0.539	-0.205
Mycbp2	chr14	y	n	-	103269357	103269465	103262701	103262821	103275788	103275890	52938	90,66,59	10,8,6	56,41,61	22,18,15	208	100	3.53e-05	0.00188616	0.812,0.799,0.825	0.55,0.523,0.662	0.234
Fbxo34	chr14	y	n	+	47509056	47509229	47507264	47507446	47526204	47526314	283	7,5,3	3,3,0	3,7,4	0,1,0	273	100	4.58e-05	0.00237171	0.461,0.379,1.0	1.0,0.719,1.0	-0.293
Fbxo34	chr14	y	n	+	47507264	47507446	47504985	47505132	47526204	47526236	278	10,9,2	6,5,7	16,17,13	2,2,2	282	100	0.000137731	0.00621808	0.371,0.39,0.092	0.739,0.751,0.697	-0.445
Ptk2	chr15	y	n	-	73211986	73211995	73210741	73210897	73215978	73216085	15109	142,95,119	297219241	281206270	187142192	109	100	0	0	0.305,0.285,0.312	0.58,0.571,0.563	-0.271
Nadk2	chr15	y	n	+	9098808	9098874	9096013	9096092	9100105	9100145	15631	148128148	104,97,89	25,14,38	144139167	166	100	0	0	0.462,0.443,0.5	0.095,0.057,0.121	0.377
Pphln1	chr15	y	n	+	93452116	93452173	93441500	93441712	93455450	93455530	28480	196172223	320248339	429285377	251213233	157	100	1.11e-15	1.61e-13	0.281,0.306,0.295	0.521,0.46,0.508	-0.202
Rai14	chr15	y	n	-	10589258	10589345	10583781	10583836	10591586	10591615	35369	43,13,32	16,3,11	184136171	3,2,4	187	100	1.89e-15	2.73e-13	0.59,0.699,0.609	0.97,0.973,0.958	-0.334
Cd47	chr16	y	n	+	49908053	49908078	49906780	49906812	49910868	49911081	7920	21,22,14	249253266	130100107	6,11,1	125	100	0	0	0.063,0.065,0.04	0.945,0.879,0.988	-0.881
Robo1	chr16	y	n	+	72993666	72993693	72989598	72989796	72995116	72995159	38313	99,73,90	39,25,35	180180141	2,3,3	127	100	0	0	0.667,0.697,0.669	0.986,0.979,0.974	-0.302
Dgcr8	chr16	y	n	-	18285100	18285308	18284591	18284696	18289102	18289231	41848	7,15,22	76,83,78	85,73,65	71,50,90	308	100	0	0	0.029,0.055,0.084	0.28,0.322,0.19	-0.208
App	chr16	y	n	-	85040250	85040307	85030231	85030365	85043575	85043743	58130	10418551077	414325351	144611561313	148144151	157	100	0	0	0.616,0.626,0.662	0.862,0.836,0.847	-0.214
Smpd4	chr16	y	n	+	17635481	17635568	17631985	17632057	17638495	17638641	24556	129101159	261193249	202163244	138123131	187	100	1.11e-16	1.66e-14	0.209,0.219,0.255	0.439,0.415,0.499	-0.223
Dlg1	chr16	y	n	+	31846836	31846933	31842769	31842839	31847635	31847669	6839	101,81,103	48,23,49	91,51,60	108116111	197	100	8.16e-13	1.01e-10	0.516,0.641,0.516	0.3,0.182,0.215	0.325
Bbx	chr16	y	n	-	50210444	50210534	50209084	50209144	50220444	50220593	61547	56,42,73	67,67,82	148118124	62,42,58	190	100	1.54e-12	1.87e-10	0.306,0.248,0.319	0.557,0.597,0.529	-0.27
Cd47	chr16	y	n	+	49908053	49908082	49906780	49906812	49910873	49911081	7922	6,5,4	3,2,5	130,98,106	0,0,0	129	100	1.42e-10	1.5e-08	0.608,0.66,0.383	1.0,1.0,1.0	-0.45
Cd47	chr16	y	n	+	49908053	49908078	49906780	49906812	49910873	49911091	7921	7,5,4	3,2,5	130,97,106	0,0,0	125	100	3.3e-10	3.36e-08	0.651,0.667,0.39	1.0,1.0,1.0	-0.431
Rbfox1	chr16	y	n	+	7363864	7363904	7352931	7353064	7407963	7408039	43750	0,5,3	2,7,1	9,8,5	1,0,0	140	100	8.47e-07	6.11e-05	0.0,0.338,0.682	0.865,1.0,1.0	-0.615
Gm45338	chr16	y	n	+	23543622	23543871	23534579	23534799	23559771	23560080	33636	11,7,9	7,4,5	25,24,40	5,2,1	349	100	9.1e-05	0.00429473	0.31,0.334,0.34	0.589,0.775,0.92	-0.433
Gm45338	chr16	y	n	+	23543622	23543871	23534579	23534799	23554697	23554933	33635	11,8,8	14,6,7	25,25,40	9,10,8	349	100	0.000810178	0.0291521	0.184,0.276,0.247	0.443,0.417,0.589	-0.247
Qk	chr17	y	n	-	10282838	10282981	10273946	10274063	10318731	10319361	2690	278623242408	2,4,2	0,58,12	158513801774	243	100	0	0	0.998,0.996,0.998	0.0,0.017,0.003	0.991
Rab12	chr17	y	n	-	66504988	66505178	66500348	66500448	66506032	66506093	7767	12,23,20	304238293	105,90,106	116110117	290	100	0	0	0.013,0.032,0.023	0.238,0.22,0.238	-0.209
Eml4	chr17	y	n	+	83428215	83428248	83427999	83428025	83440030	83440154	25804	110,80,139	11,11,22	66,40,49	44,36,40	133	100	0	0	0.883,0.845,0.826	0.53,0.455,0.479	0.363
Trim26	chr17	y	n	+	36854283	36854301	36852462	36852693	36856201	36856224	42362	135103122	5,13,17	50,44,49	114,73,99	118	100	0	0	0.958,0.87,0.859	0.271,0.338,0.296	0.594
Anks1	chr17	y	n	+	27978426	27978489	27976560	27976717	27985065	27985362	63713	38,23,25	37,23,32	60,35,38	24,11,15	163	100	5.27e-06	0.000332908	0.387,0.38,0.324	0.605,0.661,0.608	-0.261
Diaph1	chr18	y	n	-	37906387	37906414	37905003	37905159	37935201	37935381	44741	134,141,92	0,7,0	84,73,101	48,30,36	127	100	0	0	1.0,0.941,1.0	0.579,0.657,0.688	0.339
Csnk1g3	chr18	y	n	+	53936852	53936948	53933449	53933545	53948047	53948154	56403	244176199	174164145	26,27,27	311246280	196	100	0	0	0.417,0.354,0.412	0.041,0.053,0.047	0.347
Malt1	chr18	y	n	+	65449574	65449607	65448921	65449018	65451546	65451573	27038	14,8,10	4,5,4	1,2,0	25,19,17	133	100	7.77e-16	1.14e-13	0.725,0.546,0.653	0.029,0.073,0.0	0.607
Add3	chr19	y	n	+	53244309	53244405	53242503	53242627	53244997	53246940	29353	30,30,22	138105118	228218237	11,7,4	196	100	0	0	0.1,0.127,0.087	0.914,0.941,0.968	-0.836
Myof	chr19	y	n	-	37969906	37969945	37968327	37968452	37972174	37972257	31687	11948871055	137104138	25,40,34	10148441065	139	100	0	0	0.862,0.86,0.846	0.017,0.033,0.022	0.832
Sorbs1	chr19	y	n	-	40321792	40321960	40318021	40318068	40324746	40324832	21901	18,22,17	10,7,3	36,25,58	0,0,0	268	100	2.86e-12	3.46e-10	0.402,0.54,0.679	1.0,1.0,1.0	-0.46
Prune2	chr19	y	n	+	17211677	17211713	17208230	17208329	17216325	17216373	62168	7,2,8	0,0,0	4,6,7	1,2,5	136	100	3.89e-07	3e-05	1.0,1.0,1.0	0.746,0.688,0.507	0.353
Prune2	chr19	y	n	+	17211677	17211713	17208230	17208329	17212291	17212330	62167	18,2,13	1,1,4	9,7,15	22,5,13	136	100	0.000240901	0.010278	0.93,0.595,0.705	0.231,0.507,0.459	0.344
Atp5c1	chr2	y	n	-	10056769	10056806	10056029	10056161	10058995	10059092	21129	208814121664	545285453	234520052572	2,12,1	137	100	0	0	0.737,0.783,0.728	0.999,0.992,0.999	-0.247
Neb	chr2	y	n	-	52150536	52150629	52149589	52149697	52159476	52159569	21422	123,44,124	8,0,1	0,0,0	101,57,99	193	100	0	0	0.888,1.0,0.985	0.0,0.0,0.0	0.958
Neb	chr2	y	n	-	52161370	52161475	52160655	52160748	52162067	52162172	21463	62,7,60	87,28,84	1,0,0	117109128	205	100	0	0	0.258,0.109,0.258	0.004,0.0,0.0	0.207
Abi1	chr2	y	n	-	22963213	22963228	22962400	22962501	22971082	22971259	42662	147,97,165	385349343	23,27,16	618524618	115	100	0	0	0.249,0.195,0.295	0.031,0.043,0.022	0.214
Osbpl6	chr2	y	n	+	76560185	76560260	76555013	76555117	76564783	76564949	32475	14,7,8	37,31,34	9,10,5	0,2,1	175	100	6.63e-11	7.21e-09	0.178,0.114,0.119	1.0,0.741,0.741	-0.69
Sema6d	chr2	y	n	+	124662203	124662371	124660282	124660344	124664020	124665309	7355	151115117	3,6,12	81,80,112	27,23,30	268	100	2.31e-10	2.39e-08	0.949,0.877,0.784	0.528,0.565,0.582	0.312
Baz2b	chr2	y	n	-	59959820	59960105	59958431	59958492	59962020	59962630	51540	47,45,41	28,16,26	145122129	18,13,17	385	100	8.56e-10	8.54e-08	0.304,0.422,0.291	0.677,0.709,0.663	-0.344
Osbpl6	chr2	y	n	+	76555889	76555982	76555013	76555117	76560185	76560260	32473	12,7,20	3,6,3	50,25,49	0,0,0	193	100	3.27e-09	3.11e-07	0.675,0.377,0.775	1.0,1.0,1.0	-0.391
Fmnl2	chr2	y	n	+	53130411	53130505	53126852	53126976	53131839	53133804	51709	58,58,59	6,14,13	59,55,65	2,2,1	194	100	7.79e-07	5.67e-05	0.833,0.681,0.701	0.938,0.934,0.971	-0.209
Vps39	chr2	y	n	-	120346856	120346889	120346327	120346392	120350163	120350229	32926	27,39,45	75,59,70	77,53,93	53,43,36	133	100	1.18e-06	8.32e-05	0.213,0.332,0.326	0.522,0.481,0.66	-0.264
Fmnl2	chr2	y	n	+	53130411	53130458	53126852	53126976	53131839	53133804	51708	45,54,27	6,14,13	55,20,41	2,2,1	147	100	9.34e-06	0.000564055	0.836,0.724,0.586	0.949,0.872,0.965	-0.213
Cd44	chr2	y	n	-	102845284	102845410	102839357	102839477	102853014	102853236	50414	4,1,3	1,1,3	9,8,8	0,0,0	226	100	3.45e-05	0.00184913	0.639,0.307,0.307	1.0,1.0,1.0	-0.582
Npnt	chr3	y	n	-	132931581	132931632	132917460	132917553	132948046	132948147	22349	176202237	274237305	101,58,99	395325409	151	100	0	0	0.298,0.361,0.34	0.145,0.106,0.138	0.203
Adgrl2	chr3	y	n	-	148820972	148821025	148815854	148817928	148821279	148821408	31117	10,5,10	0,0,0	8,5,2	54,32,40	153	100	0	0	1.0,1.0,1.0	0.088,0.093,0.032	0.929
Adgrl2	chr3	y	n	-	148820972	148821054	148817721	148817928	148821279	148821408	31120	12,7,10	0,0,0	9,8,8	54,32,40	182	100	0	0	1.0,1.0,1.0	0.084,0.121,0.099	0.899
Tuft1	chr3	y	n	-	94639394	94639469	94638924	94639026	94658724	94658871	32914	24,23,19	10,13,3	1,2,2	27,24,26	175	100	0	0	0.578,0.503,0.784	0.021,0.045,0.042	0.586
Igsf3	chr3	y	n	+	101432914	101432974	101431203	101431593	101435330	101435732	43119	63,51,62	35,41,31	18,8,8	89,65,81	160	100	0	0	0.529,0.437,0.556	0.112,0.071,0.058	0.427
Npnt	chr3	y	n	-	132931581	132931632	132909895	132910015	132948046	132948147	22348	73,81,86	30,26,39	31,24,34	59,53,48	151	100	6.11e-15	8.63e-13	0.617,0.674,0.594	0.258,0.231,0.319	0.359
Tuft1	chr3	y	n	-	94639386	94639469	94638924	94639026	94658724	94658803	32913	11,9,9	10,13,3	0,1,0	27,24,26	183	100	5.93e-13	7.44e-11	0.375,0.274,0.621	0.0,0.022,0.0	0.416
Adgrl2	chr3	y	n	-	148849765	148849804	148846848	148847032	148850835	148851021	31132	20,18,15	48,54,43	76,43,65	44,42,45	139	100	9.58e-10	9.52e-08	0.231,0.193,0.201	0.554,0.424,0.51	-0.288
Fnip2	chr3	y	n	-	79507838	79507928	79506206	79506278	79508086	79508187	18633	38,32,30	34,18,24	48,47,58	16,10,3	190	100	2.04e-05	0.00114028	0.37,0.483,0.397	0.612,0.712,0.911	-0.328
Kif1b	chr4	y	n	-	149261159	149261201	149257869	149258003	149262135	149262278	6127	5,5,22	120,92,109	55,46,48	81,62,94	142	100	0	0	0.029,0.037,0.124	0.323,0.343,0.264	-0.247
Mpdz	chr4	y	n	-	81313499	81313598	81310156	81310319	81317593	81317704	18749	33,27,31	60,44,65	215162176	60,50,61	199	100	0	0	0.217,0.236,0.193	0.643,0.62,0.592	-0.403
Mpdz	chr4	y	n	-	81313499	81313598	81310156	81310319	81320345	81320523	18750	15,11,16	84,71,86	103,80,81	23,27,27	199	100	0	0	0.082,0.072,0.085	0.692,0.598,0.601	-0.551
Mpdz	chr4	y	n	-	81317593	81317704	81310156	81310319	81320345	81320523	18751	138112130	84,71,86	232170204	23,27,27	211	100	0	0	0.438,0.428,0.417	0.827,0.749,0.782	-0.358
Clstn1	chr4	y	n	+	149641657	149641714	149638232	149638395	149643194	149643352	39431	772697702	1,4,2	456394421	170120159	157	100	0	0	0.998,0.991,0.996	0.631,0.677,0.628	0.35
Lrp8	chr4	y	n	+	107850103	107850142	107848280	107848403	107851307	107851427	49291	61,71,59	3,1,1	45,46,70	19,14,9	139	100	3.13e-09	2.99e-07	0.936,0.981,0.977	0.63,0.703,0.848	0.238
Kif24	chr4	y	n	-	41429266	41429411	41428344	41428982	41464709	41464846	27504	16,13,13	11,18,12	4,3,4	17,13,23	245	100	1.09e-05	0.000643295	0.373,0.228,0.307	0.088,0.086,0.066	0.223
Apbb2	chr5	y	n	-	66392272	66392335	66391771	66391857	66400075	66400281	16819	159118130	21,29,27	234156201	1,0,0	163	100	0	0	0.823,0.714,0.747	0.993,1.0,1.0	-0.236
Wdfy3	chr5	y	n	-	101878005	101878059	101875840	101876009	101882422	101882650	24269	185,94,121	22,19,18	7,15,9	105,79,117	154	100	0	0	0.845,0.763,0.814	0.041,0.11,0.048	0.741
Wdfy3	chr5	y	n	-	101935989	101936073	101930827	101931005	101937281	101937739	24276	27,19,22	50,35,48	89,80,115	3,4,2	184	100	0	0	0.227,0.228,0.199	0.942,0.916,0.969	-0.724
Slain2	chr5	y	n	+	72965803	72965881	72958148	72958286	72974530	72974702	27065	258147210	254227238	471359446	123133132	178	100	0	0	0.363,0.267,0.331	0.683,0.603,0.655	-0.327
Exoc1	chr5	y	n	+	76557818	76557863	76554099	76554205	76559003	76559167	27096	7,12,7	121117135	185151147	4,8,6	145	100	0	0	0.038,0.066,0.035	0.97,0.929,0.944	-0.901
Sec31a	chr5	y	n	-	100373379	100373715	100368293	100368352	100375207	100375331	40838	148212121408	518331440	339424313370	42,25,32	436	100	0	0	0.396,0.456,0.423	0.949,0.957,0.96	-0.53
Sec31a	chr5	y	n	-	100373424	100373715	100368293	100368352	100375207	100375331	40839	128010721228	518331440	296321332970	42,25,32	391	100	0	0	0.387,0.453,0.416	0.947,0.956,0.96	-0.536
Vps29	chr5	y	n	+	122356793	122356805	122354384	122354476	122360012	122360204	63994	160106142	336252310	533386507	66,61,51	112	100	0	0	0.298,0.273,0.29	0.878,0.85,0.899	-0.589
Clip1	chr5	y	n	-	123635173	123635278	123630224	123631169	123638955	123638988	56896	71,57,76	23,29,20	23,9,26	0,0,0	205	100	8.88e-12	1.04e-09	0.601,0.489,0.65	1.0,1.0,1.0	-0.42
Wasf3	chr5	y	n	+	146460964	146461140	146455543	146455661	146465849	146466019	26780	8,7,6	7,32,18	22,12,19	3,5,0	276	100	3.62e-07	2.79e-05	0.293,0.073,0.108	0.727,0.465,1.0	-0.573
Immt	chr6	y	n	+	71866725	71866740	71863140	71863270	71868579	71868803	1183	827641764	734568676	175813051824	8,21,12	115	100	0	0	0.495,0.495,0.496	0.995,0.982,0.992	-0.494
Ankrd26	chr6	y	n	-	118540450	118540549	118539846	118539875	118542889	118542983	64811	111,89,77	0,2,3	65,51,63	19,18,18	199	100	1.11e-16	1.66e-14	1.0,0.957,0.928	0.632,0.587,0.638	0.343
Dennd5a	chr7	y	n	-	109935481	109935553	109934692	109934802	109960073	109960470	26555	395389423	0,0,0	256218286	53,40,71	172	100	0	0	1.0,1.0,1.0	0.737,0.76,0.701	0.267
Plekha1	chr7	y	n	+	130909587	130909658	130908335	130908425	130910831	130911163	28191	66,61,47	0,2,1	44,48,52	20,31,26	171	100	0	0	1.0,0.947,0.965	0.563,0.475,0.539	0.445
Plekha1	chr7	y	n	+	130909587	130909735	130908335	130908425	130910831	130913312	28192	119,98,74	0,2,1	47,58,60	20,31,26	248	100	0	0	1.0,0.952,0.968	0.487,0.43,0.482	0.507
Tnnt3	chr7	y	n	+	142505287	142505299	142504249	142504264	142505515	142505530	23527	5,5,12	27,5,22	20,17,19	0,0,3	112	100	4.85e-14	6.47e-12	0.142,0.472,0.328	1.0,1.0,0.85	-0.636
Tnnt3	chr7	y	n	+	142505287	142505299	142504249	142504264	142507749	142507788	23528	6,4,14	30,14,24	22,16,28	4,4,4	112	100	8.1e-14	1.06e-11	0.152,0.203,0.342	0.831,0.781,0.862	-0.592
Ano5	chr7	y	n	+	51535447	51535489	51526197	51526251	51537721	51537835	54793	17,8,20	16,11,10	0,0,1	15,20,12	142	100	2.35e-13	2.97e-11	0.428,0.339,0.585	0.0,0.0,0.055	0.432
Tead1	chr7	y	n	+	112856052	112856064	112839415	112839480	112856797	112856932	55646	35,37,36	3,2,0	35,24,43	8,14,11	112	100	1.17e-06	8.3e-05	0.912,0.943,1.0	0.796,0.605,0.777	0.226
Tnnt3	chr7	y	n	+	142505287	142505299	142504047	142504065	142505515	142505530	23523	4,1,4	66,20,60	5,9,10	17,25,18	112	100	2.01e-06	0.000136776	0.051,0.043,0.056	0.208,0.243,0.332	-0.211
Zfp78	chr7	y	n	+	6370958	6371105	6363331	6363347	6371305	6371396	37874	4,3,2	0,0,2	4,1,2	5,3,1	247	100	0.000683537	0.0251321	1.0,1.0,0.288	0.245,0.119,0.447	0.492
Myo9b	chr8	y	n	+	71336875	71336965	71334312	71334394	71338906	71339008	35216	226180192	66,50,47	219160196	13,5,8	190	100	0	0	0.643,0.655,0.683	0.899,0.944,0.928	-0.263
Fat1	chr8	y	n	+	45049841	45049877	45045030	45045168	45050780	45050918	39585	415283377	278248224	14,41,17	652433585	136	100	0	0	0.523,0.456,0.553	0.016,0.065,0.021	0.477
Nek1	chr8	y	n	+	61071750	61071834	61054519	61054622	61072275	61072359	52040	45,56,39	44,34,40	5,1,4	74,54,89	184	100	0	0	0.357,0.472,0.346	0.035,0.01,0.024	0.369
Zfp821	chr8	y	n	+	109708028	109708144	109706087	109706419	109709410	109709527	42163	122,68,119	17,18,30	101,65,70	54,32,38	216	100	1.53e-05	0.000875154	0.769,0.636,0.647	0.464,0.485,0.46	0.214
Bnip2	chr9	y	n	+	70004305	70004341	70003568	70003667	70007063	70008317	403	627422589	451446448	11,11,13	10119281046	136	100	0	0	0.505,0.41,0.492	0.008,0.009,0.009	0.46
Phldb1	chr9	y	n	-	44708393	44708522	44707884	44708040	44710922	44710946	5387	31,27,15	261265230	457326433	130,88,119	229	100	0	0	0.049,0.043,0.028	0.606,0.618,0.614	-0.573
Lrrfip2	chr9	y	n	+	111193046	111193118	111190167	111190284	111199664	111199774	32392	816758823	11,22,20	504466562	283246314	172	100	0	0	0.977,0.952,0.96	0.509,0.524,0.51	0.449
Myo5a	chr9	y	n	+	75196125	75196200	75193938	75194137	75197642	75197736	48360	276206264	118172129	60,29,49	366244370	175	100	0	0	0.572,0.406,0.539	0.086,0.064,0.07	0.432
Scn5a	chr9	y	n	-	119543098	119543190	119539523	119539754	119543323	119543415	50009	471377402	145160170	249196240	311238364	192	100	0	0	0.629,0.551,0.552	0.294,0.3,0.256	0.294
Slc37a2	chr9	y	n	-	37233052	37233109	37230315	37231656	37233309	37233374	57322	3,0,3	80,55,78	47,42,36	60,52,41	157	100	0	0	0.023,0.0,0.024	0.333,0.34,0.359	-0.328
Tpm1	chr9	y	n	-	67029663	67029742	67027891	67028167	67031028	67031098	64661	12856271025	19,8,16	55,73,71	15,9,16	179	100	0	0	0.974,0.978,0.973	0.672,0.819,0.713	0.24
Nme6	chr9	y	n	+	109835269	109835414	109833195	109833295	109841926	109842038	52512	7,3,3	0,0,0	19,12,7	3,5,4	245	100	7.04e-09	6.45e-07	1.0,1.0,1.0	0.721,0.495,0.417	0.456
Septin6	chrX	y	n	-	36920368	36920413	36911325	36913254	36922839	36923030	2623	0,3,0	16,9,16	51,41,54	24,14,18	145	100	0	0	0.0,0.187,0.0	0.594,0.669,0.674	-0.583
Septin6	chrX	y	n	-	36920368	36920413	36913445	36916545	36922839	36923030	2624	5,4,2	33,37,44	168145169	2,5,3	145	100	0	0	0.095,0.069,0.03	0.983,0.952,0.975	-0.905
Septin6	chrX	y	n	-	36920368	36920413	36915030	36915347	36922839	36923030	2625	0,3,0	32,27,29	55,50,58	1,2,4	145	100	0	0	0.0,0.071,0.0	0.974,0.945,0.909	-0.919
Ocrl	chrX	y	n	+	47956209	47956233	47948124	47948360	47960452	47960569	14415	12,5,8	80,58,73	106,82,111	12,22,16	124	100	0	0	0.108,0.065,0.081	0.877,0.75,0.848	-0.74
Atp11c	chrX	y	n	-	60229147	60229252	60223289	60225793	60236556	60236710	23764	171,97,192	30,46,43	42,45,37	111,64,98	205	100	0	0	0.735,0.507,0.685	0.156,0.255,0.156	0.453
Rragb	chrX	y	n	+	153148451	153148535	153143975	153144075	153150361	153150428	25212	5,5,8	66,45,53	42,48,49	31,13,18	184	100	0	0	0.04,0.057,0.076	0.424,0.667,0.597	-0.505
Slc35a2	chrX	y	n	+	7892729	7892867	7889611	7889763	7894190	7894460	42585	84,69,104	1,3,0	51,37,51	16,9,12	238	100	1.08e-13	1.4e-11	0.972,0.906,1.0	0.573,0.633,0.641	0.344
Dmd	chrX	y	n	+	85197503	85197535	85190609	85190702	85202470	85202498	10781	23,26,12	37,42,20	7,3,8	36,36,51	132	100	3.13e-07	2.44e-05	0.32,0.319,0.313	0.128,0.059,0.106	0.22
Ints6l	chrX	y	n	+	56494132	56494243	56493038	56493133	56496515	56496734	49746	57,30,60	0,2,2	41,37,39	16,3,11	211	100	1.31e-06	9.14e-05	1.0,0.877,0.934	0.548,0.854,0.627	0.261
Sytl4	chrX	y	n	-	133943559	133943668	133936384	133938050	133947736	133947898	11206	16,10,9	2,0,11	13,6,8	29,15,20	209	100	0.000400445	0.015778	0.793,1.0,0.281	0.177,0.161,0.161	0.525
Uggt1	chr1	n	n	-	36176775	36176799	36176232	36176327	36177517	36177616	3234	324247356	39,32,37	255160231	114,92,107	124	100	0	0	0.87,0.862,0.886	0.643,0.584,0.635	0.252
Dst	chr1	n	n	+	34303420	34303531	34302829	34303032	34306527	34306651	36101	11229711021	0,0,1	173105177	492442582	211	100	0	0	1.0,1.0,0.998	0.143,0.101,0.126	0.876
Igsf9	chr1	n	n	+	172484781	172484970	172484280	172484546	172489512	172489593	53869	81,38,46	1,2,1	52,19,31	13,22,14	289	100	1.58e-11	1.81e-09	0.966,0.868,0.941	0.581,0.23,0.434	0.51
Inpp4a	chr1	n	n	+	37374271	37374289	37372310	37372419	37377577	37377761	58258	0,0,8	14,18,17	5,13,7	5,3,0	118	100	4.6e-07	3.49e-05	0.0,0.0,0.285	0.459,0.786,1.0	-0.653
Msc	chr1	n	n	-	14754505	14754542	14753745	14754325	14755229	14755353	28953	13,9,9	9,13,10	3,1,1	14,11,21	137	100	4.76e-07	3.59e-05	0.513,0.336,0.396	0.135,0.062,0.034	0.338
Lrrfip1	chr1	n	n	+	91110354	91110447	91108579	91108672	91112155	91112297	24436	50,45,56	4,3,3	25,36,36	11,9,10	193	100	1.54e-05	0.000879877	0.866,0.886,0.906	0.541,0.675,0.651	0.264
Lama2	chr10	n	n	-	27021460	27021472	27018406	27018527	27023271	27023410	10305	16,6,16	181119204	158167144	64,55,71	112	100	0	0	0.073,0.043,0.065	0.688,0.731,0.644	-0.627
Lama2	chr10	n	n	-	27053027	27053033	27050197	27050352	27054502	27054685	10307	139103126	7,0,4	57,42,38	131131145	106	100	0	0	0.949,1.0,0.967	0.291,0.232,0.198	0.732
Col13a1	chr10	n	n	-	61862014	61862113	61860439	61860484	61862627	61862771	30509	76,101,78	67,79,62	174131179	29,25,27	199	100	0	0	0.363,0.391,0.387	0.751,0.725,0.769	-0.368
Col13a1	chr10	n	n	-	61891207	61891264	61887248	61887356	61892955	61892982	30516	24,17,16	85,71,79	92,69,89	24,18,31	157	100	0	0	0.152,0.132,0.114	0.709,0.709,0.646	-0.555
Itga7	chr10	n	n	+	128941444	128941576	128940681	128940937	128941821	128941941	36322	269238265	156111261333	10638871085	314281321	232	100	0	0	0.069,0.083,0.079	0.593,0.576,0.593	-0.51
Itga7	chr10	n	n	+	128941821	128941941	128941444	128941576	128942807	128943015	36325	219718132065	249215198	691465696	767663698	220	100	0	0	0.8,0.793,0.826	0.291,0.242,0.312	0.525
Stxbp5	chr10	n	n	-	9784340	9784400	9778020	9778071	9789362	9789428	36613	36,17,39	7,0,4	47,28,39	141,83,137	160	100	0	0	0.763,1.0,0.859	0.172,0.174,0.151	0.708
L3mbtl3	chr10	n	n	-	26344176	26344251	26342507	26342667	26344611	26344723	42873	119111107	0,1,3	64,52,60	39,50,41	175	100	0	0	1.0,0.984,0.953	0.484,0.373,0.455	0.542
Med23	chr10	n	n	+	24883203	24883221	24882553	24882649	24888399	24888600	62500	59,38,51	78,75,58	19,24,17	87,76,110	118	100	2.9e-08	2.54e-06	0.391,0.3,0.427	0.156,0.211,0.116	0.212
Phactr2	chr10	n	n	-	13255309	13255321	13253341	13253879	13261765	13261924	47121	24,35,22	18,21,16	14,26,15	37,27,38	112	100	0.000609559	0.0228873	0.543,0.598,0.551	0.253,0.462,0.261	0.239
Spag9	chr11	n	n	+	94113262	94113301	94112032	94112146	94114172	94114349	5289	366306361	67,67,63	32,14,12	344231286	139	100	0	0	0.797,0.767,0.805	0.063,0.042,0.029	0.745
Synrg	chr11	n	n	+	83986813	83987047	83982195	83982307	83987912	83987990	43834	155135135	0,0,0	1,8,7	28,45,42	334	100	0	0	1.0,1.0,1.0	0.011,0.051,0.048	0.963
Myo18a	chr11	n	n	+	77854677	77854722	77853751	77853891	77857722	77857845	64568	240183242	0,1,1	116,93,117	143100127	145	100	0	0	1.0,0.992,0.994	0.359,0.391,0.389	0.616
Cacnb1	chr11	n	n	-	98010626	98010646	98010295	98010376	98011865	98011942	21274	2,1,2	24,16,16	24,26,27	15,12,18	120	100	3.55e-15	5.07e-13	0.065,0.05,0.094	0.571,0.644,0.556	-0.521
Mxra7	chr11	n	n	-	116810787	116810867	116807728	116807968	116811922	116812016	9921	210137225	34,54,57	112,89,100	73,95,122	180	100	1.76e-09	1.73e-07	0.774,0.585,0.687	0.46,0.342,0.313	0.31
Cacnb1	chr11	n	n	-	98010626	98010646	98009857	98009916	98011865	98011942	21273	1,0,1	0,1,3	9,5,6	2,0,0	120	100	0.000273296	0.0114447	1.0,0.0,0.217	0.789,1.0,1.0	-0.524
Myo18a	chr11	n	n	+	77821529	77821550	77821041	77821186	77822662	77822674	64559	0,0,0	17,5,14	1,1,4	7,4,3	121	100	0.00120431	0.0404716	0.0,0.0,0.0	0.106,0.171,0.524	-0.267
Jag2	chr12	n	n	-	112915604	112915718	112915470	112915517	112915879	112915993	35391	674507635	173,97,126	314266381	231162210	214	100	0	0	0.645,0.71,0.702	0.388,0.434,0.459	0.259
Actn1	chr12	n	n	-	80170685	80170766	80170182	80170248	80171728	80171875	39251	256723092445	87,52,85	207417502105	843631805	181	100	0	0	0.942,0.961,0.941	0.576,0.605,0.591	0.357
Evl	chr12	n	n	+	108683347	108683410	108683194	108683261	108686049	108686116	65172	527402400	81,58,56	90,76,83	398314391	163	100	0	0	0.8,0.81,0.814	0.122,0.129,0.115	0.686
Nrcam	chr12	n	n	+	44566839	44566869	44566287	44566412	44568543	44568645	6229	2,6,0	16,19,10	10,18,12	1,2,3	130	100	2.05e-14	2.81e-12	0.088,0.195,0.0	0.885,0.874,0.755	-0.744
Numb	chr12	n	n	-	83797196	83797343	83794035	83796154	83799507	83799523	46537	13,10,22	71,89,95	76,66,46	78,41,70	247	100	5.76e-14	7.61e-12	0.069,0.044,0.086	0.283,0.395,0.21	-0.23
Erbin	chr13	n	n	-	103827906	103828023	103823313	103823406	103833497	103835028	57712	190183184	255184214	302239322	65,53,61	217	100	0	0	0.256,0.314,0.284	0.682,0.675,0.709	-0.404
Macroh2a1	chr13	n	n	-	56088251	56088342	56084195	56084285	56096123	56096234	15508	363265354	8,6,5	85,78,68	16,10,15	191	100	2.14e-14	2.92e-12	0.96,0.959,0.974	0.736,0.803,0.704	0.217
Ktn1	chr14	n	n	+	47726470	47726554	47726225	47726309	47730339	47730423	13868	687557600	153138131	333287346	257203256	184	100	0	0	0.709,0.687,0.713	0.413,0.435,0.423	0.279
Mbnl2	chr14	n	n	+	120395711	120395765	120388899	120389163	120396450	120396604	39444	90,120,96	175176120	212206206	140,93,109	154	100	9.3e-14	1.21e-11	0.25,0.307,0.342	0.496,0.59,0.551	-0.246
Ndrg2	chr14	n	n	-	51911085	51911127	51910505	51910785	51911465	51911546	42267	27,9,18	63,69,62	26,53,44	48,27,51	142	100	6.32e-05	0.00315271	0.232,0.084,0.17	0.276,0.58,0.378	-0.249
Slc22a17	chr14	n	n	-	54908822	54908988	54908501	54908647	54909670	54909825	61104	71,35,59	22,10,19	30,32,33	32,16,27	266	100	0.000307109	0.0126365	0.548,0.568,0.539	0.261,0.429,0.315	0.217
Gm49527	chr15	n	n	+	76889335	76889486	76888230	76888347	76890006	76890192	13462	17,6,18	83,47,49	50,41,63	44,49,59	251	100	1.27e-12	1.56e-10	0.075,0.048,0.128	0.312,0.25,0.298	-0.203
Arhgap39	chr15	n	n	-	76730363	76730456	76727402	76727476	76734876	76735438	57239	120116102	0,4,0	67,52,81	8,7,16	193	100	5.78e-11	6.33e-09	1.0,0.938,1.0	0.813,0.794,0.724	0.202
Hdac10	chr15	n	n	-	89126629	89126706	89126377	89126437	89126868	89126995	53197	70,46,80	0,0,1	54,26,38	9,10,4	177	100	2.99e-10	3.07e-08	1.0,1.0,0.978	0.772,0.595,0.843	0.256
Mroh1	chr15	n	n	+	76432371	76432398	76432148	76432295	76433273	76433396	51882	69,36,46	2,1,5	46,56,49	12,16,19	127	100	9.33e-08	7.82e-06	0.964,0.966,0.879	0.751,0.734,0.67	0.218
Golgb1	chr16	n	n	+	36893315	36893438	36891366	36891492	36894830	36894944	33917	45,36,48	19,20,5	9,20,14	31,31,35	223	100	2.08e-07	1.65e-05	0.515,0.447,0.811	0.115,0.224,0.152	0.427
Arvcf	chr16	n	n	+	18405101	18405221	18404459	18404545	18405606	18406747	37206	22,23,28	7,11,5	77,44,54	4,3,0	220	100	1.32e-06	9.21e-05	0.588,0.487,0.718	0.897,0.87,1.0	-0.325
Afdn	chr17	n	n	+	13848354	13848375	13846433	13846639	13849107	13849253	28373	37,24,53	3,8,6	10,6,3	35,35,49	121	100	0	0	0.911,0.713,0.88	0.191,0.124,0.048	0.714
Rab11fip3	chr17	n	n	-	26011996	26012131	26008854	26008890	26013773	26013917	47933	125,93,107	64,56,64	327244295	13,14,14	235	100	0	0	0.454,0.414,0.416	0.915,0.881,0.9	-0.471
Atat1	chr17	n	n	-	35898256	35898299	35897594	35897915	35898387	35898467	58626	40,30,33	0,1,0	9,7,2	12,7,6	143	100	0	0	1.0,0.955,1.0	0.344,0.412,0.189	0.67
Synj2	chr17	n	n	+	6036356	6036505	6035410	6035559	6037383	6037462	41317	6,15,14	9,21,14	97,60,74	14,8,15	249	100	8.13e-13	1.01e-10	0.211,0.223,0.287	0.736,0.751,0.665	-0.477
Tbc1d24	chr17	n	n	-	24184380	24184398	24183693	24183848	24185203	24186201	52140	0,3,1	2,2,3	4,2,2	0,0,1	118	100	1.89e-06	0.000128991	0.0,0.56,0.22	1.0,1.0,0.629	-0.616
Tbc1d24	chr17	n	n	-	24184380	24184398	24183693	24183852	24185203	24186201	52141	3,16,5	27,38,45	15,10,33	27,13,32	118	100	4.56e-05	0.00236521	0.086,0.263,0.086	0.32,0.395,0.466	-0.249
Bin1	chr18	n	n	+	32414944	32415037	32414182	32414290	32419842	32419928	22890	110,67,68	228216322087	127410711279	173615031764	193	100	0	0	0.024,0.021,0.017	0.275,0.27,0.273	-0.252
Svil	chr18	n	n	+	5054017	5054098	5048884	5049494	5057274	5057439	14108	2,5,7	1,1,0	0,0,0	7,2,1	181	100	3.89e-13	4.9e-11	0.525,0.734,1.0	0.0,0.0,0.0	0.753
Svil	chr18	n	n	+	5055979	5056849	5048884	5049494	5057274	5057439	14110	46,17,29	1,1,0	6,6,12	7,2,1	970	100	7.12e-07	5.21e-05	0.826,0.637,1.0	0.081,0.236,0.553	0.531
Svil	chr18	n	n	+	5055979	5056849	5054017	5054098	5058124	5058159	14113	39,16,25	3,0,4	4,5,11	0,0,0	970	100	3.48e-06	0.000226674	0.573,1.0,0.392	1.0,1.0,1.0	-0.345
Rnf14	chr18	n	n	+	38297499	38297575	38296804	38297205	38299753	38299926	62894	6,9,11	0,0,2	4,10,6	2,0,4	176	100	0.001022	0.0353083	1.0,1.0,0.758	0.532,1.0,0.46	0.255
Incenp	chr19	n	n	-	9883191	9883203	9878318	9878428	9883698	9883833	20693	391278399	580471531	29,26,24	10278231004	112	100	0	0	0.376,0.345,0.402	0.025,0.027,0.021	0.35
Mark2	chr19	n	n	-	7281797	7281959	7280997	7281255	7282725	7282818	31901	190161153	229163180	630492576	72,57,58	262	100	0	0	0.241,0.274,0.245	0.77,0.767,0.791	-0.523
Gpr137	chr19	n	n	-	6939528	6939754	6939260	6939410	6940351	6940401	45704	262149171	35,26,23	97,84,117	62,51,48	326	100	1.83e-13	2.33e-11	0.697,0.637,0.695	0.324,0.336,0.428	0.314
Gpr137	chr19	n	n	-	6939528	6939686	6939260	6939410	6940351	6940401	45703	147,70,82	35,26,23	41,46,53	62,51,48	258	100	1.25e-12	1.53e-10	0.619,0.511,0.58	0.204,0.259,0.3	0.316
Prune2	chr19	n	n	+	17216325	17216373	17211677	17211713	17220783	17221809	62175	5,2,1	5,6,20	15,9,9	0,2,4	148	100	4.84e-07	3.64e-05	0.403,0.184,0.033	1.0,0.753,0.603	-0.579
Tcf7l2	chr19	n	n	+	55924529	55924580	55923895	55923944	55926683	55926756	11758	23,23,38	6,3,1	20,19,14	12,11,32	151	100	3.18e-06	0.000209126	0.717,0.835,0.962	0.525,0.534,0.225	0.41
Mfsd13a	chr19	n	n	+	46371935	46372107	46369236	46369333	46372181	46372375	4149	22,8,17	0,1,0	11,11,6	1,3,6	272	100	3.71e-06	0.000240323	1.0,0.746,1.0	0.802,0.574,0.269	0.367
Tcf7l2	chr19	n	n	+	55925976	55926049	55923895	55923944	55926683	55926756	11760	37,40,41	6,3,1	45,26,39	12,11,32	173	100	7.58e-06	0.000463907	0.781,0.885,0.96	0.684,0.577,0.413	0.317
Tmem179b	chr19	n	n	-	8773504	8773622	8773027	8773106	8774334	8774467	64337	81,55,83	8,9,7	70,62,88	22,36,25	218	100	1.06e-05	0.00062888	0.823,0.737,0.845	0.593,0.441,0.618	0.251
Prune2	chr19	n	n	+	17212291	17212330	17208230	17208329	17216325	17216373	62170	4,2,2	0,0,0	18,9,13	1,2,5	139	100	2.51e-05	0.00138541	1.0,1.0,1.0	0.928,0.764,0.652	0.219
Prune2	chr19	n	n	+	17212291	17212330	17211677	17211713	17220783	17221809	62173	9,1,6	5,6,20	8,6,14	0,2,4	139	100	0.000181821	0.00796119	0.564,0.107,0.178	1.0,0.683,0.716	-0.517
Tcf7l2	chr19	n	n	+	55924529	55924580	55923895	55923944	55931433	55933253	11759	29,39,53	28,7,11	33,28,25	47,31,41	151	100	0.00033672	0.0136565	0.407,0.787,0.761	0.317,0.374,0.288	0.325
Sh3glb2	chr2	n	n	-	30348554	30348617	30347080	30347104	30350287	30350380	4417	338251303	10,1,4	193166151	95,62,94	163	100	0	0	0.954,0.994,0.979	0.555,0.622,0.496	0.418
Ndrg3	chr2	n	n	-	156929931	156929970	156927344	156928881	156931215	156931267	16559	25,13,21	196157207	66,72,84	158106146	139	100	0	0	0.084,0.056,0.068	0.231,0.328,0.293	-0.215
Epb41l1	chr2	n	n	+	156524880	156525288	156514027	156514210	156526888	156526993	17724	883617730	107,89,110	156013411331	90,42,61	508	100	0	0	0.619,0.577,0.566	0.773,0.863,0.811	-0.228
Neb	chr2	n	n	-	52151363	52151456	52149589	52149697	52159476	52159569	21429	40,19,21	8,0,1	1,2,1	101,57,99	193	100	0	0	0.722,1.0,0.916	0.005,0.018,0.005	0.87
Neb	chr2	n	n	-	52157831	52157924	52149589	52149697	52159476	52159569	21457	68,24,58	8,0,1	2,1,0	101,57,99	193	100	0	0	0.815,1.0,0.968	0.01,0.009,0.0	0.921
Itga6	chr2	n	n	+	71853533	71853663	71849380	71849506	71855853	71856758	21680	419162407	13,11,9	234240200	121,93,105	230	100	0	0	0.933,0.865,0.952	0.457,0.529,0.453	0.437
Frmd4a	chr2	n	n	+	4607998	4608070	4605969	4606066	4610966	4614041	37189	72,57,54	182209202	228156208	227153227	172	100	0	0	0.187,0.137,0.135	0.369,0.372,0.348	-0.21
Ctnnd1	chr2	n	n	-	84603187	84603274	84600070	84602903	84603648	84603752	42621	1,2,4	509415560	215178227	381374465	187	100	0	0	0.001,0.003,0.004	0.232,0.203,0.207	-0.211
Ctnnd1	chr2	n	n	-	84603187	84603274	84602628	84602900	84603648	84603752	42622	1,2,5	59,47,74	145111148	37,47,41	187	100	0	0	0.009,0.022,0.035	0.677,0.558,0.659	-0.609
Ctnnd1	chr2	n	n	-	84612531	84612549	84612023	84612092	84612935	84613089	42626	638487700	84,96,74	420344435	318254327	118	100	0	0	0.866,0.811,0.889	0.528,0.534,0.53	0.325
Fnbp1	chr2	n	n	-	31052984	31053080	31040404	31040514	31054023	31054218	46038	106,121,99	1,1,0	48,47,60	68,69,83	196	100	0	0	0.982,0.984,1.0	0.265,0.258,0.269	0.725
Fnbp1	chr2	n	n	-	31052984	31053137	31040404	31040514	31054023	31054218	46040	202225189	1,1,0	79,66,83	68,69,83	253	100	0	0	0.988,0.989,1.0	0.315,0.274,0.283	0.702
Fnbp1	chr2	n	n	-	31052984	31053167	31040404	31040514	31054023	31054218	46041	262338257	1,1,0	109,94,105	68,69,83	283	100	0	0	0.989,0.992,1.0	0.362,0.325,0.309	0.662
Neb	chr2	n	n	-	52163936	52164050	52162904	52163009	52164591	52164702	21465	234104211	13,12,19	147,89,149	56,48,42	214	100	1e-12	1.24e-10	0.894,0.802,0.838	0.551,0.464,0.624	0.298
Neb	chr2	n	n	-	52153055	52153148	52151363	52151456	52159476	52159569	21438	38,13,18	37,19,19	0,1,0	1,2,1	193	100	4.49e-05	0.00233335	0.347,0.262,0.329	0.0,0.206,0.0	0.244
Gsn	chr2	n	n	+	35282650	35282721	35256383	35256473	35283904	35284109	2088	4,17,17	13,12,3	2,4,1	17,20,13	171	100	8.92e-05	0.00422206	0.152,0.453,0.768	0.064,0.105,0.043	0.387
Fnbp1	chr2	n	n	-	31052984	31053080	31044881	31044896	31054023	31054218	46039	12,18,8	0,0,0	3,1,11	1,1,3	196	100	0.00103114	0.0355372	1.0,1.0,1.0	0.605,0.338,0.652	0.468
Rapgef2	chr3	n	n	-	79082623	79082647	79081061	79081285	79083198	79083322	13839	66,75,91	4,4,0	23,14,37	41,31,47	124	100	0	0	0.93,0.938,1.0	0.311,0.267,0.388	0.634
Arfip1	chr3	n	n	-	84529169	84529265	84527685	84527798	84534586	84534695	25478	87,51,77	180174214	209184237	117,96,120	196	100	0	0	0.198,0.13,0.155	0.477,0.494,0.502	-0.33
Arfip1	chr3	n	n	-	84529190	84529265	84527685	84527798	84534586	84534695	25479	30,26,29	180174214	69,65,101	117,96,120	175	100	0	0	0.087,0.079,0.072	0.252,0.279,0.325	-0.206
Arhgef11	chr3	n	n	+	87695397	87695517	87688778	87688850	87697344	87697390	49567	36,25,47	98,95,96	185124181	50,49,44	220	100	0	0	0.143,0.107,0.182	0.627,0.535,0.652	-0.461
Mef2d	chr3	n	n	+	88161780	88161801	88161190	88161381	88162957	88163087	52838	49,25,44	325353280	311218255	160133209	121	100	0	0	0.111,0.055,0.115	0.616,0.575,0.502	-0.471
Sema6c	chr3	n	n	+	95171790	95171886	95171557	95171602	95172254	95173653	14797	23,12,27	10,5,12	19,11,17	21,19,18	196	100	0.000589278	0.022229	0.54,0.55,0.534	0.316,0.228,0.325	0.252
Necap2	chr4	n	n	-	141071580	141071695	141070081	141070233	141072528	141072637	23169	36,36,29	373336377	41,42,60	62,44,50	215	100	0	0	0.043,0.047,0.035	0.235,0.307,0.358	-0.258
Necap2	chr4	n	n	-	141071580	141071717	141070055	141070233	141072528	141072637	23170	31,29,28	373336377	45,39,57	62,44,50	237	100	0	0	0.034,0.035,0.03	0.234,0.272,0.325	-0.244
Epb41	chr4	n	n	-	131962923	131962986	131957619	131957819	131967787	131967975	37594	77,41,46	73,67,53	144,93,148	17,15,16	163	100	0	0	0.393,0.273,0.347	0.839,0.792,0.85	-0.489
Arhgef10l	chr4	n	n	-	140568755	140568770	140568338	140568520	140570256	140570402	38578	9,1,13	77,45,60	80,74,91	40,29,42	115	100	0	0	0.092,0.019,0.159	0.635,0.689,0.653	-0.569
Sync	chr4	n	n	+	129306627	129306704	129306341	129306466	129308041	129308559	49742	436324425	33,29,43	121113135	166126169	177	100	0	0	0.882,0.863,0.848	0.292,0.336,0.311	0.551
Dennd4c	chr4	n	n	+	86813781	86813928	86813392	86813537	86819861	86819981	59560	123,132,91	62,53,66	276205256	0,2,2	247	100	0	0	0.445,0.502,0.358	1.0,0.976,0.981	-0.551
Map7d1	chr4	n	n	-	126238521	126238632	126236895	126237278	126240031	126240137	126	231228242	105,106,97	517474500	66,76,100	211	100	8.33e-15	1.17e-12	0.51,0.505,0.542	0.788,0.747,0.703	-0.227
Tmem234	chr4	n	n	+	129601406	129601625	129600982	129601134	129601869	129601930	15246	161138177	59,40,47	243197237	27,18,23	319	100	1.29e-10	1.37e-08	0.461,0.52,0.541	0.738,0.774,0.764	-0.251
Tmem234	chr4	n	n	+	129601406	129601625	129600982	129601243	129601869	129601930	15250	182175197	59,30,47	280218269	22,29,20	319	100	4.81e-06	0.000307661	0.492,0.646,0.568	0.8,0.702,0.808	-0.201
Col16a1	chr4	n	n	+	130073068	130073116	130072825	130072885	130073239	130073293	35463	30,44,18	11,7,5	27,23,29	26,27,13	148	100	0.000582389	0.0220278	0.648,0.809,0.709	0.412,0.365,0.601	0.263
Afap1	chr5	n	n	+	35987054	35987321	35984187	35984306	35989553	35989668	6072	2,0,2	119,70,101	253183260	69,43,57	367	100	0	0	0.005,0.0,0.005	0.5,0.537,0.554	-0.527
Map11	chr5	n	n	-	138261552	138261716	138260834	138260989	138261801	138261884	8275	366323335	84,55,75	714511676	29,20,20	264	100	0	0	0.623,0.69,0.629	0.903,0.906,0.928	-0.265
Akap9	chr5	n	n	+	3954396	3954450	3951689	3951734	3954791	3954962	15474	62,54,44	0,0,1	1,1,1	35,32,38	154	100	0	0	1.0,1.0,0.966	0.018,0.02,0.017	0.97
Ncor2	chr5	n	n	-	125019818	125020046	125018810	125018990	125022870	125022924	32105	994820862	409334361	177112871745	351211283	328	100	0	0	0.426,0.428,0.421	0.606,0.65,0.653	-0.211
Fryl	chr5	n	n	-	73115255	73115300	73112748	73112852	73118483	73118585	35515	0,0,0	43,21,37	19,22,34	1,1,1	145	100	0	0	0.0,0.0,0.0	0.929,0.938,0.959	-0.942
Camkk2	chr5	n	n	-	122736987	122737030	122731169	122734245	122737432	122737533	40697	20,16,24	99,92,80	282192213	23,25,21	143	100	0	0	0.124,0.108,0.173	0.896,0.843,0.876	-0.737
Cit	chr5	n	n	+	115987687	115987732	115986893	115987063	115988155	115988236	51147	202151192	20,28,12	75,47,84	151,112,94	145	100	0	0	0.874,0.788,0.917	0.255,0.224,0.381	0.573
Dmtf1	chr5	n	n	-	9126539	9126749	9124441	9124527	9127956	9128108	10868	320294338	101115111	473376390	74,45,61	310	100	2.18e-11	2.46e-09	0.505,0.452,0.496	0.673,0.729,0.673	-0.207
Pitpnm2	chr5	n	n	-	124124797	124124959	124123938	124124087	124125298	124125463	7166	135153140	19,20,19	119,97,118	56,37,58	262	100	3.28e-11	3.65e-09	0.731,0.745,0.738	0.448,0.5,0.437	0.276
Dmtf1	chr5	n	n	-	9126539	9126802	9124441	9124527	9127956	9128108	10869	280255284	101115111	399307331	74,45,61	363	100	1.45e-10	1.54e-08	0.433,0.379,0.413	0.598,0.653,0.599	-0.208
Dmtf1	chr5	n	n	-	9126539	9126643	9124441	9124527	9127956	9128108	10867	147106136	101115111	191172151	74,45,61	204	100	4.34e-08	3.73e-06	0.416,0.311,0.375	0.559,0.652,0.548	-0.219
Fgfr1op2	chr6	n	n	+	146592633	146592747	146589893	146590036	146595175	146595289	33006	916763897	117,80,142	114101165	532350477	214	100	0	0	0.785,0.817,0.747	0.091,0.119,0.139	0.667
Mical3	chr6	n	n	-	120953633	120953684	120952374	120952485	120957698	120957793	38266	70,51,82	23,21,23	30,11,16	58,36,50	151	100	0	0	0.668,0.617,0.702	0.255,0.168,0.175	0.463
Adcyap1r1	chr6	n	n	+	55491229	55491310	55484941	55485033	55494076	55494206	13211	224254248	129118125	343245326	60,53,64	181	100	8.37e-14	1.09e-11	0.49,0.543,0.523	0.76,0.719,0.738	-0.22
Mical3	chr6	n	n	-	120966053	120966116	120962754	120962865	120973402	120973647	38270	34,22,28	36,28,23	8,11,12	64,54,36	163	100	9.74e-10	9.67e-08	0.367,0.325,0.428	0.071,0.111,0.17	0.256
Tnnt3	chr7	n	n	+	142507749	142507788	142504022	142504065	142508334	142508353	23540	145,84,124	26,14,22	40,44,42	58,69,46	139	100	0	0	0.8,0.812,0.802	0.332,0.314,0.396	0.457
Tnnt3	chr7	n	n	+	142507749	142507788	142505287	142505299	142508334	142508353	23543	87,42,84	0,0,2	38,24,42	42,33,37	139	100	0	0	1.0,1.0,0.968	0.394,0.343,0.45	0.594
Tnnt3	chr7	n	n	+	142507749	142507788	142505515	142505530	142508334	142508353	23545	180,65,166	5,1,4	42,33,41	14,17,13	139	100	0	0	0.963,0.979,0.968	0.683,0.583,0.694	0.317
Myo7a	chr7	n	n	-	98099473	98099491	98098186	98098371	98102549	98102702	24352	0,1,1	21,12,21	22,11,10	4,2,6	118	100	0	0	0.0,0.066,0.039	0.823,0.823,0.585	-0.709
Ano1	chr7	n	n	-	144648574	144648640	144648023	144648079	144650502	144650554	44695	105,65,103	78,64,113	46,34,44	205154198	166	100	0	0	0.448,0.38,0.354	0.119,0.117,0.118	0.276
Axl	chr7	n	n	-	25773098	25773125	25770632	25770765	25773342	25773493	45545	299625992843	224177159	215215712036	801599752	127	100	0	0	0.913,0.92,0.934	0.679,0.674,0.681	0.244
Tnfrsf22	chr7	n	n	-	143639244	143639289	143636724	143638436	143639901	143639975	54721	37,29,30	41,47,37	45,59,68	2,7,12	145	100	0	0	0.384,0.299,0.359	0.939,0.853,0.796	-0.515
Sytl2	chr7	n	n	+	90395162	90395282	90392358	90392453	90396473	90396643	59414	810584812	433311419	208315111956	34,51,28	220	100	0	0	0.46,0.46,0.468	0.965,0.931,0.969	-0.492
Stim1	chr7	n	n	+	102428773	102428866	102427081	102427317	102430884	102430928	61250	25,17,19	38,17,28	0,0,0	45,39,36	193	100	0	0	0.254,0.341,0.26	0.0,0.0,0.0	0.285
Emsy	chr7	n	n	-	98645166	98645208	98641492	98641668	98646448	98646523	14881	76,72,88	17,19,24	60,44,54	44,38,55	142	100	4.09e-10	4.13e-08	0.759,0.727,0.721	0.49,0.449,0.409	0.286
Ppfia3	chr7	n	n	-	45343552	45343579	45342325	45342501	45343740	45343803	65091	0,0,0	5,2,1	4,5,4	2,4,3	127	100	5.23e-09	4.9e-07	0.0,0.0,0.0	0.612,0.496,0.512	-0.54
Meis3	chr7	n	n	+	16178744	16178795	16175274	16175567	16182040	16182152	44711	1,1,1	0,0,0	0,1,0	2,1,1	151	100	2.27e-08	2.02e-06	1.0,1.0,1.0	0.0,0.398,0.0	0.867
Usp29	chr7	n	n	+	6737564	6737634	6730582	6731302	6738806	6738945	4999	5,5,11	3,2,8	2,1,1	15,12,11	170	100	5.8e-08	4.94e-06	0.495,0.595,0.447	0.073,0.047,0.051	0.455
Tead1	chr7	n	n	+	112841887	112841950	112839415	112839480	112856797	112856932	55640	35,32,41	3,2,0	25,17,33	8,14,11	163	100	1.12e-07	9.25e-06	0.877,0.908,1.0	0.657,0.427,0.648	0.351
Nav2	chr7	n	n	+	49551596	49552049	49547838	49548541	49556909	49556996	31270	206133153	38,11,22	328249374	18,4,11	553	100	4.33e-07	3.29e-05	0.495,0.686,0.557	0.767,0.918,0.86	-0.269
Tead1	chr7	n	n	+	112841887	112841950	112839415	112839480	112856052	112856064	55639	48,37,53	1,3,0	38,25,48	11,6,8	163	100	6.64e-07	4.89e-05	0.967,0.883,1.0	0.679,0.719,0.786	0.222
Usp29	chr7	n	n	+	6737564	6737634	6730582	6731302	6738792	6738945	4998	3,3,4	0,0,0	1,1,3	5,3,0	170	100	8.96e-07	6.44e-05	1.0,1.0,1.0	0.105,0.164,1.0	0.577
Usp29	chr7	n	n	+	6737564	6737634	6730582	6731302	6738855	6738945	5000	7,3,11	3,3,0	1,3,1	16,5,3	170	100	3.66e-05	0.00194524	0.579,0.37,1.0	0.035,0.261,0.164	0.496
Tnnt3	chr7	n	n	+	142505515	142505530	142504022	142504065	142508334	142508353	23533	22,8,17	26,14,22	14,18,12	58,69,46	115	100	6.55e-05	0.00324253	0.424,0.332,0.402	0.173,0.185,0.185	0.205
Nav2	chr7	n	n	+	49554214	49554259	49547838	49548541	49556909	49557070	31275	22,11,15	38,11,22	34,31,19	18,4,11	145	100	0.000239344	0.010227	0.285,0.408,0.32	0.566,0.842,0.544	-0.313
Nav2	chr7	n	n	+	49554214	49554259	49551596	49552049	49556909	49557070	31276	20,13,17	5,7,1	30,29,18	1,1,1	145	100	0.000276975	0.0115731	0.734,0.562,0.921	0.954,0.952,0.925	-0.205
Trim68	chr7	n	n	-	102679673	102679696	102679035	102679136	102680136	102680397	17577	25,23,27	6,8,7	25,13,27	23,15,16	123	100	0.000503254	0.0193445	0.772,0.7,0.758	0.469,0.413,0.578	0.257
Plekha7	chr7	n	n	-	116156855	116156975	116154632	116154686	116157481	116157568	33352	0,0,4	16,8,4	2,6,5	6,2,1	220	100	0.000583543	0.022042	0.0,0.0,0.313	0.132,0.577,0.694	-0.363
Kcnc3	chr7	n	n	+	44598805	44598933	44598383	44598575	44600673	44601080	17034	13,20,25	1,1,1	19,8,16	1,7,8	228	100	0.000649187	0.0241354	0.851,0.898,0.916	0.893,0.334,0.467	0.324
Tnnt3	chr7	n	n	+	142505515	142505530	142505287	142505299	142507749	142507788	23536	30,10,23	5,4,10	15,17,19	16,11,26	115	100	0.000713207	0.0260203	0.839,0.685,0.667	0.449,0.573,0.389	0.26
Nfix	chr8	n	n	-	84723727	84723850	84721642	84721818	84726468	84726605	9437	11089801011	101,75,80	980729844	230199202	223	100	0	0	0.831,0.854,0.85	0.656,0.622,0.652	0.202
Ndrg4	chr8	n	n	+	95712324	95712363	95711092	95711144	95713177	95713918	21609	11,1,4	23,26,25	29,29,32	16,22,24	139	100	6.48e-09	5.98e-07	0.256,0.027,0.103	0.566,0.487,0.49	-0.386
Phldb1	chr9	n	n	-	44698826	44698871	44697925	44698220	44699346	44699449	5380	33,18,34	472410477	340265340	421284352	145	100	0	0	0.046,0.029,0.047	0.358,0.392,0.4	-0.343
Dnm2	chr9	n	n	+	21490657	21490669	21489742	21489794	21494503	21494617	7157	199189215	323241307	342251290	138107117	112	100	0	0	0.355,0.412,0.385	0.689,0.677,0.689	-0.301
Slc25a38	chr9	n	n	+	120119882	120119955	120117452	120117537	120120256	120120280	26697	43,46,33	77,54,53	14,4,11	178127139	173	100	0	0	0.244,0.33,0.265	0.043,0.018,0.044	0.245
Slc44a2	chr9	n	n	+	21353000	21353128	21352466	21352551	21353681	21353851	49314	479326413	301220083133	207315341765	233318412139	228	100	0	0	0.065,0.066,0.055	0.28,0.268,0.266	-0.209
Slc44a2	chr9	n	n	+	21353000	21353172	21352466	21352551	21353681	21353978	49315	717501699	301220083133	328225712898	233318412139	272	100	0	0	0.08,0.084,0.076	0.341,0.339,0.332	-0.257
Scn5a	chr9	n	n	-	119543323	119543415	119543098	119543190	119550605	119550734	50012	159171167	452296390	321225345	212153174	192	100	0	0	0.155,0.231,0.182	0.441,0.434,0.508	-0.272
Nme6	chr9	n	n	+	109841475	109841515	109839607	109839710	109841926	109842038	52527	418318340	9,5,5	236165262	74,49,61	140	100	0	0	0.971,0.978,0.98	0.695,0.706,0.754	0.258
Tpm1	chr9	n	n	-	67031950	67032026	67031451	67031514	67032465	67032541	64667	467833424060	129310691044	176115301770	446635504642	176	100	0	0	0.673,0.64,0.688	0.183,0.197,0.178	0.481
Tpm1	chr9	n	n	-	67032465	67032541	67031950	67032026	67032793	67032864	64671	11788731015	561137064798	390628943843	195017081907	176	100	0	0	0.107,0.118,0.107	0.532,0.491,0.534	-0.408
Yipf2	chr9	n	n	-	21592527	21592588	21592060	21592218	21592726	21592810	36769	39,39,33	3,1,2	28,30,34	12,14,16	161	100	3.21e-09	3.06e-07	0.89,0.96,0.911	0.592,0.571,0.569	0.343
Dock6	chr9	n	n	-	21825782	21825875	21825434	21825530	21829473	21829578	56245	58,54,43	49,26,37	67,52,62	11,7,11	193	100	3.4e-09	3.22e-07	0.38,0.518,0.376	0.759,0.794,0.745	-0.341
Arhgap32	chr9	n	n	+	32152667	32152709	32151921	32152013	32153039	32153124	46511	4,5,1	16,22,18	10,8,17	5,7,13	142	100	2.29e-07	1.81e-05	0.15,0.138,0.038	0.585,0.446,0.479	-0.395
Dock6	chr9	n	n	-	21829473	21829578	21825782	21825875	21830213	21830377	56249	80,51,58	14,20,17	45,31,36	40,16,44	205	100	5.67e-05	0.00288063	0.736,0.554,0.625	0.354,0.486,0.285	0.263
Gpm6b	chrX	n	n	+	166385390	166385481	166383934	166384000	166386951	166388988	44020	36,28,35	3,2,5	3,8,1	21,30,27	191	100	0	0	0.863,0.88,0.786	0.07,0.123,0.019	0.772
Zfp275	chrX	n	n	+	73351268	73351360	73344836	73344912	73351808	73351923	13815	180122128	71,66,62	247241334	46,31,49	192	100	1.7e-13	2.17e-11	0.569,0.491,0.518	0.737,0.802,0.78	-0.247
Slc9a7	chrX	n	n	-	20138912	20138972	20131770	20131834	20158814	20158968	11596	36,30,48	1,1,6	37,28,34	16,5,11	160	100	6.74e-05	0.00331737	0.957,0.949,0.833	0.591,0.778,0.659	0.237

## Sheet: Microexon overlap Lee et al
Fmnl2
Inpp4a
Macf1
Incenp
Spag9
Cd47
Cacnb1
Vps29
Immt
Fryl
Atp9b
Exoc1
Atp5c1
Rbfox1
Trappc13
Ocrl
Osbpl8
Arhgap32
Nme6
Eml4
Clstn1
Clip1
Synrg
Rps24
Trim26
Abi1
Med23
Atat1
Rapgef2
Dst
Mark3
Diaph1
Cask
Ralgapa1
Bnip2
Mia2
Afdn
Clasp2
